# Supplementary material
Source: publisher figshare collection journal article supplement (https://gsajournals.figshare.com/ndownloader/files/17872349)
Supplement: Supplementary file 1 [file 17872349]

	Length	IBT_Glu_1	IBT_Glu_2	IBT_Glu_3	IBT_Gly_1	IBT_Gly_2	IBT_Gly_3	IBT_GlyGlu_1	IBT_GlyGlu_2	IBT_GlyGlu_3	W29_Glu_1	W29_Glu_2	W29_Glu_3	W29_Gly_1	W29_Gly_2	W29_Gly_3	W29_GlyGlu_1	W29_GlyGlu_2	W29_GlyGlu_3
YALI1_A00014g	354	163	147	103	66	79	61	52	119	226	97	113	17	161	193	175	388	214	367
YALI1_A00019g	321	265	241	142	95	124	92	77	129	283	98	144	12	178	196	188	493	283	424
YALI1_A00032g	636	8	16	6	2	3	2	0	2	21	17	19	1	25	24	12	63	45	85
YALI1_A00058g	2664	181	219	76	88	86	75	175	68	231	35565	46366	5561	48182	52994	49448	115000	67828	115313
YALI1_A00102g	1836	157716	190593	107078	75452	75282	55184	300437	105760	157984	25313	36147	6269	50900	75816	40738	120543	82401	106540
YALI1_A00135g	336	37	17	8	14	7	10	17	17	27	8	9	6	11	25	13	52	14	46
YALI1_A00148g	1095	163	295	114	96	97	54	172	146	166	135	205	24	303	375	197	530	666	513
YALI1_A00204g	498	62	45	42	34	23	34	20	47	79	288	255	73	174	174	183	495	253	436
YALI1_A00241g	771	275	166	148	118	105	99	119	125	367	12	9	2	12	20	14	32	17	29
YALI1_A00252g	1239	2260	2217	1154	749	918	737	771	1300	2837	716	726	112	804	1018	1022	2150	1401	2385
YALI1_A00271r	85	2	8	0	3	0	0	0	0	1	2	2	0	0	3	0	5	1	1
YALI1_A00309g	3243	50158	59499	32133	25939	26208	20210	79738	31069	62316	11103	15968	2076	21109	34513	22075	54284	35865	48572
YALI1_A00325g	1107	21692	24161	11949	8882	9337	6935	38525	13125	20862	4964	5517	720	6625	10891	6227	15907	12226	15960
YALI1_A00375g	651	1276	1585	749	537	566	447	1283	730	1450	511	530	50	596	903	753	1895	1221	1939
YALI1_A00406g	2529	228349	237148	141996	107651	106514	82519	374609	143002	231346	31004	45463	7461	66978	102904	62304	150199	109484	131837
YALI1_A00447g	795	427	214	166	161	153	161	64	150	562	172	137	26	125	217	271	424	264	415
YALI1_A00468g	531	248	167	151	110	118	73	98	142	267	314	489	70	88	68	152	305	193	250
YALI1_A00504g	1518	13654	8837	5972	6005	5682	4730	3620	6569	17116	3729	4452	509	4994	8268	6501	15468	8925	13869
YALI1_A00538g	1620	3191	2872	1675	1340	1321	1102	1291	1778	3751	387	419	28	358	646	526	1003	790	1099
YALI1_A00558g	525	6373	5432	3169	2898	2558	2499	3558	3423	8011	1656	2103	201	1852	3466	2135	6734	3864	5307
YALI1_A00574g	384	278	253	174	123	140	117	204	229	328	80	85	11	91	157	90	270	147	243
YALI1_A00579r	81	1	2	0	0	1	0	2	3	2	0	0	0	0	0	0	0	0	2
YALI1_A00601g	2826	11190	9033	5056	4152	4252	4207	6787	4542	13239	2074	2862	394	3635	5010	5133	9955	6684	9655
YALI1_A00661g	1590	24	11	14	14	7	9	4	4	22	0	6	0	0	2	4	8	2	2
YALI1_A00683g	1596	518	338	174	187	203	142	264	178	509	61	91	10	87	113	118	270	145	222
YALI1_A00715g	1404	322	237	185	101	143	169	151	184	362	71	58	5	29	50	57	153	78	209
YALI1_A00746g	1290	17416	25952	12615	9737	10783	7430	50217	12509	20705	2883	4078	612	5045	7964	3664	13622	8914	10809
YALI1_A00789g	3570	3807	7120	3939	1918	1858	1647	3999	2377	5392	2033	2438	300	3457	5935	3603	8318	5725	7552
YALI1_A00801g	672	2013	2350	1164	703	890	589	2002	956	2082	613	680	112	647	1149	600	2087	1312	1824
YALI1_A00829g	681	3409	2991	1840	2019	1838	1558	534	1815	4686	1014	1024	147	1378	1991	2201	3213	2152	3153
YALI1_A00867g	2355	3750	1926	1768	1529	1457	1498	1707	1943	3641	267	220	12	349	501	775	418	648	495
YALI1_A00905g	294	31	42	17	16	23	27	32	28	69	17	1	0	18	43	21	44	57	30
YALI1_A00911g	252	146	125	66	88	60	91	63	68	237	13	10	0	13	20	27	16	21	15
YALI1_A00921r	82	1	0	0	0	0	0	0	0	2	0	0	0	0	0	0	0	0	0
YALI1_A00947g	2706	3291	3203	2023	1681	1763	1393	3590	1902	4321	986	1380	157	1474	2638	2022	4325	2833	4208
YALI1_A00983g	594	1603	1656	1010	572	620	562	988	873	1928	584	637	88	749	1142	720	2056	1345	1824
YALI1_A01061g	3141	28085	30129	18898	13201	13175	11066	46495	17860	32541	5835	7822	914	9950	17107	10631	24282	18084	22260
YALI1_A01074g	507	382	295	176	141	199	131	255	266	390	40	85	5	71	55	81	100	102	134
YALI1_A01093g	1398	1323	2037	911	692	703	599	1026	869	1935	532	699	70	863	1239	920	2370	1350	2160
YALI1_A01122g	1044	17720	11423	6832	4919	4401	3880	8565	7103	23142	3550	3849	326	2714	5662	3702	15464	10406	15566
YALI1_A01143g	1554	427	285	199	215	224	168	54	219	602	53	89	17	73	86	136	285	164	296
YALI1_A01173g	1386	20374	18318	11326	10409	9714	8439	14499	11260	26626	5872	7522	932	10236	14469	11103	24537	15285	23000
YALI1_A01198g	2259	9430	12517	6458	4041	4086	3269	5487	4926	10489	3651	4564	641	5238	7543	5050	14793	8193	13280
YALI1_A01230g	321	68	80	16	17	27	11	34	43	70	28	35	7	24	26	39	72	52	117
YALI1_A01240g	519	120	121	69	67	55	53	69	122	155	49	66	14	54	78	78	130	99	186
YALI1_A01241g	204	178	125	89	97	85	48	98	101	218	123	98	9	86	139	116	231	172	250
YALI1_A01249g	453	521	369	205	230	250	208	315	262	592	247	276	32	263	446	383	908	534	843
YALI1_A01260g	312	28	32	18	21	21	19	47	22	46	23	10	2	22	28	8	39	30	52
YALI1_A01267g	1449	4941	4440	2875	2673	2730	2298	5037	3710	6197	1512	1813	229	2347	3608	2868	5562	4128	5440
YALI1_A01298g	1083	2401	2345	1534	1247	1183	994	2255	1701	3028	786	873	141	1083	1589	1135	3152	2091	2913
YALI1_A01394g	3237	25802	21173	15872	13359	13167	12745	113288	23887	24767	7301	9185	1202	13905	20544	19817	30437	21398	31479
YALI1_A01430g	285	14	7	4	3	10	6	20	10	16	5	2	0	4	8	6	28	2	3
YALI1_A01434g	249	34	12	14	8	12	17	14	30	38	3	2	0	11	7	6	34	11	16
YALI1_A01468g	1116	4809	4498	2838	2565	2472	2006	4975	2965	6161	1254	1449	225	1769	2980	1844	5610	3116	4914
YALI1_A01505g	462	4974	4129	3022	2037	2327	2209	3813	2918	7307	2120	2032	280	2882	3458	3225	6654	4288	6610
YALI1_A01537g	1563	400	229	438	388	474	546	643	352	1397	1435	1483	79	297	1053	2240	6330	5310	1498
YALI1_A01577g	528	1201	1039	677	570	539	451	644	721	1475	367	451	48	329	629	494	1282	848	1208
YALI1_A01602g	1641	717	5946	3250	2036	2479	1532	8221	1880	3961	1087	1317	142	1600	2213	1371	4571	3404	5203
YALI1_A01618g	318	1081	1188	425	580	554	497	69	514	2457	849	847	80	611	1108	1045	2387	1376	2750
YALI1_A01628g	1227	6712	5077	2969	3529	3333	2724	2178	3444	11227	2881	3131	267	3219	5953	4152	11952	7480	10993
YALI1_A01642r	97	19	26	16	8	19	4	1	10	39	3	12	0	2	16	11	17	13	18
YALI1_A01654r	100	8	2	2	0	2	4	1	0	1	0	0	0	0	1	0	2	1	2
YALI1_A01670g	1497	14	10	15	3	10	8	11	20	38	2	0	0	8	6	5	18	8	14
YALI1_A01689r	99	0	0	2	2	0	0	0	0	5	0	0	0	0	0	0	0	0	0
YALI1_A01717g	1194	3264	4893	2270	1627	1427	1193	2999	1922	4186	1301	1754	208	1887	3323	2127	5601	3096	4688
YALI1_A01732g	273	221	353	183	103	120	82	147	125	290	74	81	10	98	160	106	261	109	241
YALI1_A01736g	309	120	253	95	81	65	49	104	92	195	59	64	4	59	143	56	238	121	144
YALI1_A01766g	2235	2184	5988	2722	1248	1354	1032	4621	1777	2453	1171	1483	165	1962	2984	1952	4768	3037	4384
YALI1_A01777g	798	2634	5874	2492	1154	1401	991	4438	1671	3001	1304	1425	170	1933	2539	1603	5236	2941	4517
YALI1_A01786r	44	124	80	46	52	64	28	77	45	106	35	29	2	31	118	39	135	80	123
YALI1_A01794g	2820	3494	4300	2563	1957	2060	1634	2419	2394	5322	1530	2086	222	2375	3673	2674	5783	3976	5948
YALI1_A01824g	375	9122	9107	5494	4049	4237	3388	8090	5892	10012	2896	3828	505	4237	5409	3505	12715	6136	10692
YALI1_A01842g	1065	1090	587	387	453	486	346	82	383	2051	554	622	83	576	1044	757	1962	1175	2040
YALI1_A01854g	237	99	58	44	39	21	34	17	44	178	66	52	7	51	128	68	224	109	179
YALI1_A01864g	309	7295	5901	4129	3087	2780	2551	3174	3905	6666	2693	2708	320	3298	3880	3681	7491	4246	7625
YALI1_A01868g	276	380	272	182	120	131	135	183	228	385	134	136	15	143	186	156	252	227	317
YALI1_A01888g	1425	2107	2077	1088	901	930	762	663	1056	2553	635	765	92	844	1347	900	2096	1430	2078
YALI1_A01905g	1086	2590	2402	1412	1165	1208	976	2811	1484	2951	180	202	24	259	406	238	837	435	632
YALI1_A02022g	240	133	275	129	65	62	43	75	55	172	80	61	2	67	126	62	196	98	150
YALI1_A02037g	1074	958	1844	890	295	380	225	653	398	982	283	373	56	378	542	421	924	552	933
YALI1_A02057r	96	0	0	0	0	0	0	2	0	0	0	0	0	2	0	0	0	0	0
YALI1_A02075g	1572	904	678	441	277	294	261	31	308	1237	213	215	18	209	291	306	603	348	810
YALI1_A02083g	393	5462	5537	2784	1999	2158	1753	3281	2930	5921	1449	1681	114	1580	2332	1754	5082	2521	4591
YALI1_A02096g	1281	1032	1081	581	426	515	416	1131	688	1242	201	345	41	325	515	463	835	631	883
YALI1_A02113g	375	513	513	277	233	230	135	452	283	453	146	148	9	142	240	167	458	334	425
YALI1_A02131g	1146	2846	2411	1500	1231	1208	1051	3030	1643	3195	499	552	62	586	925	682	1328	1001	1451
YALI1_A02138r	74	0	0	0	0	0	0	0	0	0	0	0	0	0	0	0	0	2	0
YALI1_A02150g	1842	2491	3945	2099	1040	1137	940	2171	1537	2575	1350	1451	193	2036	2845	1825	4708	2904	4439
YALI1_A02190g	987	674	478	324	174	207	172	150	267	630	102	154	16	117	223	141	321	178	296
YALI1_A02198g	960	97	38	25	19	30	36	23	34	100	0	0	0	0	0	3	10	8	10
YALI1_A02263g	2277	17009	12432	8289	8989	8548	7697	14300	10534	21182	4919	5872	948	9356	13540	14760	18610	14391	20671
YALI1_A02301g	315	79	56	33	36	38	31	40	50	93	5	20	3	40	41	40	98	41	96
YALI1_A02318r	85	0	0	0	0	0	0	0	0	0	0	0	0	0	0	0	0	0	0
YALI1_A02335g	1602	24	69	8	13	10	11	8	6	25	8	34	2	0	4	2	18	0	8
YALI1_A02365g	1557	250	131	92	87	106	91	31	108	339	40	50	2	26	52	73	108	82	98
YALI1_A02394g	1380	181	156	98	104	105	95	80	106	235	37	67	17	49	102	61	260	124	154
YALI1_A02426g	1791	477	348	326	199	251	232	256	270	625	173	187	16	153	262	242	557	272	458
YALI1_A02443g	975	2069	1800	984	848	923	661	53	865	3167	733	961	104	909	1443	1049	3086	1622	2883
YALI1_A02461g	1077	1345	2300	1238	729	691	557	1143	866	1682	621	789	107	935	1587	928	2633	1818	2149
YALI1_A02470g	1923	1821	2330	1296	1213	1296	861	2275	1419	2696	816	1105	153	1355	1811	1316	2957	2108	3236
YALI1_A02499g	375	2308	2373	1252	1192	1091	939	1679	1520	3134	758	1009	85	998	1519	944	3218	1870	2566
YALI1_A02546g	4209	10853	9362	5251	4213	4461	3675	8032	5647	12942	2720	3199	361	3379	5549	4569	9847	6311	9904
YALI1_A02552g	396	1130	1104	633	446	414	416	1149	673	1108	350	458	50	408	689	350	1265	906	1093
YALI1_A02561g	438	1981	2108	1241	727	782	597	1946	1183	2002	527	510	63	639	896	540	1662	1148	1634
YALI1_A02568g	2268	4473	4180	2418	1833	1860	1472	2216	2514	5390	1350	1469	156	1312	2461	1976	4043	2683	4098
YALI1_A02615g	2253	10716	9854	6541	6011	5943	5135	6432	6762	16222	4209	5586	709	6918	11168	8202	18447	11731	17215
YALI1_A02653g	1722	1229	1090	648	656	669	562	277	810	1851	368	441	39	549	806	671	1467	952	1534
YALI1_A02682g	3162	2629	5794	2995	1346	1352	1058	3347	1842	3003	886	1286	188	1857	2537	1707	3926	2656	3562
YALI1_A02728g	2490	4592	2910	2119	1804	1681	1518	2210	1830	4772	1664	2138	203	2427	3490	3925	6152	4464	6590
YALI1_A02775g	1491	47554	46285	26072	23411	21800	17362	34264	24166	62795	16547	19956	2641	23138	35332	27628	63122	39045	57946
YALI1_A02813g	1476	1772	1602	938	713	724	596	1508	1237	1950	461	579	100	523	797	731	1432	1168	1718
YALI1_A02819g	309	46	11	16	11	16	11	14	13	43	25	30	4	29	62	35	122	74	104
YALI1_A02833g	1485	13924	10073	7359	7035	6540	5822	10277	8900	16583	3926	4434	610	5849	8883	7458	14748	10210	14628
YALI1_A02875g	654	139	85	54	59	52	73	45	67	189	16	33	8	24	45	36	92	47	72
YALI1_A02895g	957	820	1303	658	310	329	276	568	575	1073	397	487	51	477	792	491	1207	754	1138
YALI1_A02947g	1059	855	794	501	397	372	344	442	503	1155	295	259	16	227	450	383	898	584	915
YALI1_A02974g	2289	3034	2012	1663	1285	1299	1095	1248	1602	3902	686	937	96	895	1285	1301	2420	1562	2542
YALI1_A02977g	216	29	55	12	14	12	10	25	16	36	13	11	0	24	12	8	36	10	22
YALI1_A02998g	546	29	79	45	31	23	13	17	12	43	10	16	8	22	41	25	40	38	43
YALI1_A03017g	618	15	37	30	20	19	19	22	24	39	23	23	2	22	44	14	106	40	84
YALI1_A03029g	834	44380	49548	19150	18033	20803	14280	22374	18895	60162	18374	18316	2583	31948	37587	35921	65633	39649	75089
YALI1_A03069g	2280	3522	3232	2056	1683	1720	1286	3671	2271	4706	967	1325	168	1337	2104	1426	3590	2437	3231
YALI1_A03081g	561	1446	1466	808	648	750	596	1500	1001	1626	440	533	71	556	779	472	1652	843	1357
YALI1_A03091g	1023	1230	1477	793	619	670	475	949	811	1730	554	586	74	737	1043	747	1889	1274	1800
YALI1_A03116g	1287	1049	677	308	599	669	490	384	423	2116	562	820	60	399	833	611	2213	1016	1939
YALI1_A03137g	351	484	433	270	265	305	262	49	306	897	198	223	17	179	386	266	599	425	622
YALI1_A03153g	549	26953	21956	10082	8215	8934	7172	14375	11440	20983	6324	7746	1229	7424	9305	7103	24139	12858	20696
YALI1_A03170g	786	8844	6331	3352	3706	3513	2848	3285	3770	12878	3605	4027	416	3546	6579	4069	11364	7061	11505
YALI1_A03183g	1014	12690	15529	8387	6049	5830	4785	24397	8399	13473	2805	3792	529	4954	7759	3921	12487	8295	10312
YALI1_A03210g	960	1371	1416	800	680	697	548	850	794	1789	771	816	144	925	1382	1007	2660	1663	2436
YALI1_A03242r	90	0	0	0	0	0	0	0	0	0	0	0	0	0	0	0	0	0	2
YALI1_A03258g	540	2	4	2	2	0	0	2	2	3	6	34	0	0	2	10	6	20	4
YALI1_A03278g	426	5027	5869	2951	1829	1866	1487	7963	2786	4316	1068	1384	171	1464	2518	930	4333	2863	3678
YALI1_A03289g	222	1113	991	637	490	538	409	869	755	1494	329	360	37	278	574	392	991	714	956
YALI1_A03300g	1620	231	183	114	80	105	79	149	94	278	99	135	12	165	218	190	457	289	363
YALI1_A03322g	678	59334	60364	32085	25223	24449	19584	69908	33837	57219	15017	20073	2886	23080	30300	22473	62018	32206	53383
YALI1_A03351g	648	2736	3320	1896	1089	1169	942	1920	1531	3086	981	1183	175	1257	1861	1327	3746	2016	3132
YALI1_A03356g	2205	3577	3189	1973	1604	1506	1255	2150	2097	4303	967	1257	170	1250	2037	1571	3363	2407	3470
YALI1_A03396g	1074	19985	17280	9742	8033	8512	6303	21899	10132	21312	4755	6448	972	7849	11287	8321	23712	13807	21354
YALI1_A03402g	510	4323	5633	2940	2404	2264	1580	8063	3355	4770	1125	1570	226	1890	2708	1388	5258	3409	4352
YALI1_A03422g	969	9593	7667	5103	5119	4945	4042	4832	5365	14033	3241	3753	491	4304	7233	4664	13110	7320	10999
YALI1_A03437r	73	0	0	0	0	0	0	0	0	0	0	0	0	0	0	0	0	0	0
YALI1_A03442g	546	0	0	0	0	0	0	0	0	1	0	0	0	0	0	0	0	0	0
YALI1_A03450g	1506	59	17	6	24	38	35	2	26	187	17	0	0	10	17	8	91	21	60
YALI1_A03487g	348	3741	4623	2174	1767	1637	1524	2422	2243	5973	1563	1811	120	1713	2808	1556	5924	3074	5413
YALI1_A03507g	240	23	18	19	12	20	29	13	23	62	2	3	0	2	10	6	13	4	4
YALI1_A03512g	1635	561	357	330	329	280	304	411	312	591	38	54	10	59	100	101	159	99	132
YALI1_A03529r	82	0	0	0	0	0	0	0	0	0	0	0	0	0	0	0	0	0	0
YALI1_A03549g	669	0	0	0	2	0	0	2	0	12	0	0	0	0	0	0	0	0	0
YALI1_A03567g	1143	86	56	58	39	23	24	39	62	93	3	24	0	9	21	9	19	22	31
YALI1_A03579g	438	142	156	68	74	72	66	57	69	177	57	52	4	63	62	76	153	94	187
YALI1_A03599g	243	168	153	72	55	68	76	99	93	164	50	58	9	71	105	136	156	93	168
YALI1_A03624g	1650	2555	2177	1355	1244	1296	1214	1747	1513	3246	958	1011	117	1398	1903	1602	3511	2149	3287
YALI1_A03627r	93	1	0	1	6	0	2	1	1	3	0	0	0	0	0	1	4	0	0
YALI1_A03632r	84	17	26	7	15	14	13	32	17	31	2	0	0	11	15	4	37	18	50
YALI1_A03643r	100	1	2	0	0	0	0	0	0	2	0	0	0	0	0	0	0	1	0
YALI1_A03669g	2076	2618	4923	2713	1334	1381	1072	2450	1592	3877	1749	2351	296	2287	4237	2741	7263	4649	6438
YALI1_A03688g	519	71	31	55	34	35	44	33	54	76	38	56	1	33	48	87	92	114	81
YALI1_A03721g	1818	5699	4728	3088	2697	2717	2352	2815	3242	7773	1858	2319	321	2588	4196	3202	7965	4791	7099
YALI1_A03732r	99	2	3	0	0	0	0	7	0	6	0	0	0	1	0	0	2	4	4
YALI1_A03757g	2106	11329	14660	7790	4377	5061	3685	41963	7377	8718	1703	1963	325	2870	3689	1885	6667	5128	6211
YALI1_A03763g	1269	718	950	452	298	284	300	638	381	858	285	356	23	337	456	431	946	572	1006
YALI1_A03803g	2523	6019	5023	3161	2689	2817	2586	2133	3242	8416	1860	2475	240	2310	4015	3207	6969	4385	6680
YALI1_A03809g	318	1521	1147	822	511	455	463	732	838	1482	450	592	63	477	776	642	1682	1007	1741
YALI1_A03815g	309	629	518	326	362	298	267	322	348	1038	267	399	37	263	691	376	1042	676	912
YALI1_A03837g	1479	37407	32914	18994	18175	17227	14881	17961	17916	46407	15566	20808	2921	26021	37015	29269	73657	38364	61536
YALI1_A03842g	357	117	81	65	56	32	52	33	56	133	26	35	3	22	34	37	118	83	83
YALI1_A03857g	1029	1556	1800	1002	702	868	655	1520	1144	2054	491	603	91	641	976	789	1842	1265	2067
YALI1_A03883g	1032	1289	1287	835	766	701	550	799	880	1877	485	465	86	630	826	816	1469	986	1766
YALI1_A03900g	453	884	614	417	296	336	231	520	395	902	191	222	25	186	389	300	566	395	649
YALI1_A03907g	552	1044	893	570	364	435	355	695	730	1093	228	319	28	357	514	407	859	489	901
YALI1_A03933r	87	0	0	0	0	0	0	0	0	2	0	0	0	0	0	0	0	0	0
YALI1_A03937g	1545	2584	2284	1434	1160	1188	1008	2310	1611	3216	724	790	83	834	1306	918	2371	1535	2388
YALI1_A03964g	993	5219	6504	3521	1720	2057	1628	15258	3237	4355	842	1013	159	1253	1956	867	3346	2751	3175
YALI1_A04006g	633	4827	8729	4033	2149	3429	2653	36263	6692	5764	177	236	30	222	293	242	594	437	522
YALI1_A04022g	1602	20159	23726	14036	8893	9487	7444	42948	13086	19959	4323	5823	752	7127	11057	6144	18602	12396	16990
YALI1_A04044g	270	10	1	3	6	3	2	6	4	6	0	12	0	2	0	8	2	10	4
YALI1_A04071g	1902	1563	1928	926	715	805	622	1047	1003	2239	781	918	131	994	1460	1228	2988	1930	2864
YALI1_A04109g	3375	9306	8449	4734	4575	4381	3660	9537	5089	12529	2568	3241	325	3494	5892	4532	9564	6574	9882
YALI1_A04119g	966	5807	7619	4100	2702	2888	2135	21527	4141	5275	1022	1187	120	1526	2513	1155	3575	2903	3092
YALI1_A04155r	119	0	3	0	0	2	0	0	0	0	0	1	0	0	0	0	0	0	0
YALI1_A04164g	315	92	75	43	29	28	36	68	64	95	85	123	6	46	99	55	215	80	158
YALI1_A04178g	2310	2173	2527	1463	890	1011	784	1633	1280	2597	1129	1218	157	1280	2094	1615	3440	2347	3432
YALI1_A04261g	2712	363	218	156	210	177	178	172	259	479	61	110	10	66	122	111	204	221	218
YALI1_A04309g	1701	1293	877	679	504	515	457	686	654	1217	192	208	27	195	257	275	525	351	584
YALI1_A04332g	561	249	163	116	78	81	72	112	111	278	26	47	6	36	46	26	79	51	56
YALI1_A04338r	87	2	2	0	4	2	0	4	0	4	0	0	0	0	0	0	4	0	0
YALI1_A04341g	1650	812	915	569	355	288	291	774	595	1032	179	170	35	188	410	241	495	291	493
YALI1_A04359r	81	99	122	67	34	25	31	102	71	78	17	21	5	23	31	23	60	45	54
YALI1_A04385g	1161	802	879	354	279	390	223	726	548	757	108	188	14	174	224	177	498	390	592
YALI1_A04398r	96	134	155	76	57	100	42	235	117	174	38	45	1	48	56	39	91	71	130
YALI1_A04415g	1167	3755	3176	1893	1638	1888	1648	3802	3142	4909	648	928	70	927	1498	1267	2370	1787	2775
YALI1_A04438r	119	0	0	0	0	0	0	0	0	0	0	0	0	0	0	0	0	0	0
YALI1_A04439r	71	0	0	0	0	0	0	0	0	0	0	0	0	0	0	0	0	0	0
YALI1_A04446r	92	6	12	4	0	5	0	6	1	8	2	4	0	8	5	6	9	11	6
YALI1_A04462g	2157	4	6	0	2	4	4	6	0	11	8	4	0	4	0	2	2	2	6
YALI1_A04495g	849	182	170	128	143	160	151	103	164	415	144	177	10	112	228	166	389	287	430
YALI1_A04533g	849	333	407	223	176	165	138	169	241	562	120	184	20	155	251	221	539	292	506
YALI1_A04561g	1062	5337	5108	2861	2614	2453	2039	4389	2831	7024	1693	2240	294	2518	3937	2525	7542	4250	6540
YALI1_A04576g	630	1659	1902	1060	870	816	682	608	945	2396	923	1108	104	1068	1725	1252	3451	2111	3104
YALI1_A04602r	92	0	0	0	0	0	0	0	0	0	0	0	0	0	0	0	0	0	0
YALI1_A04611r	72	0	0	0	0	0	0	0	0	0	2	0	0	0	0	0	0	0	0
YALI1_A04620g	609	417	352	207	204	203	171	251	276	534	136	152	24	133	229	133	440	220	442
YALI1_A04645r	74	0	0	0	0	0	0	2	0	1	0	4	0	0	0	0	0	0	1
YALI1_A04653g	324	2	0	0	4	4	0	0	2	4	0	0	0	0	0	0	2	0	0
YALI1_A04661g	300	0	0	0	0	0	0	0	0	0	0	0	0	0	0	4	0	0	0
YALI1_A04676g	732	0	2	0	0	0	0	0	2	4	2	0	0	0	0	2	4	0	4
YALI1_A04699r	74	0	0	0	0	0	0	0	0	0	0	0	0	0	0	0	0	0	0
YALI1_A04709r	71	0	0	0	0	0	0	0	0	3	0	1	0	3	0	0	0	1	1
YALI1_A04710r	119	4	1	0	0	0	0	2	0	4	1	1	1	0	0	1	1	0	0
YALI1_A04715g	459	2648	2470	1325	836	808	742	1807	1480	2582	1059	1212	151	945	1612	1005	3390	1692	2815
YALI1_A04742g	3648	5925	8006	4308	3138	3399	2677	6747	3739	9089	2751	3902	451	5034	6733	5636	11679	8394	13294
YALI1_A04781g	213	268	168	100	71	82	79	17	112	346	62	57	1	38	50	54	150	63	165
YALI1_A04795g	1005	537	295	235	147	153	171	21	232	630	84	107	5	76	136	120	231	158	264
YALI1_A04815g	1527	2604	2329	1285	1043	1087	1009	1890	1441	3607	642	766	59	733	1201	875	2156	1448	2195
YALI1_A04817g	540	1791	1928	966	616	646	583	1344	983	1894	481	543	51	489	962	561	1502	951	1334
YALI1_A04848g	2358	8866	7130	4859	4124	4008	3584	5551	4609	10707	2096	2585	336	3072	4434	4407	7613	5034	7677
YALI1_A04859g	471	53	52	22	13	14	21	17	31	51	5	3	3	16	14	15	20	25	23
YALI1_A04864g	582	465	377	227	164	168	140	152	259	449	83	80	13	101	194	151	232	167	243
YALI1_A04884g	258	6	3	5	8	4	2	6	5	24	4	5	0	4	14	7	20	6	23
YALI1_A04893g	1989	798	1006	539	355	355	297	385	441	1005	343	403	33	431	575	595	1144	692	1164
YALI1_A04916r	74	2	2	0	0	0	0	2	5	0	0	0	0	0	2	2	2	0	4
YALI1_A04927g	933	768	487	377	320	311	312	402	433	802	194	209	32	252	354	342	633	417	594
YALI1_A04958r	92	8	2	0	2	0	0	2	2	2	0	4	0	2	0	2	4	2	2
YALI1_A04976g	1353	6120	4135	3162	3116	2845	2577	799	3317	8777	1578	1313	94	1345	2641	2803	3472	3435	4305
YALI1_A04983g	489	62	51	34	49	29	30	29	42	78	18	22	0	23	33	35	67	38	70
YALI1_A04990g	237	110	74	80	78	77	80	49	95	158	2	9	0	7	22	22	20	16	16
YALI1_A05003g	624	6503	5080	3418	3394	2995	2725	2422	3684	9468	2450	2421	344	2667	4300	3238	8142	5053	7816
YALI1_A05031g	1221	12823	12796	8020	6095	5941	5367	11631	8844	15243	4619	5557	587	6458	10686	6894	16960	12493	16072
YALI1_A05052g	2997	6217	8232	4524	2380	3056	1985	25247	4506	4947	883	998	140	1377	2381	1218	3005	2627	3099
YALI1_A05091g	399	4029	4572	2305	1538	1523	1129	3786	1992	4816	1530	1526	128	1296	2350	1383	4450	2571	3833
YALI1_A05116g	984	14244	12002	7040	6641	6364	5458	10166	7882	16303	4268	5288	708	5994	8225	6612	15562	9802	14803
YALI1_A05143g	1005	48	22	16	18	16	12	8	18	46	4	10	0	4	14	5	11	10	8
YALI1_A05168g	780	4691	4795	2618	2346	2290	2192	5833	2996	5989	1246	1477	170	1803	2447	2142	4054	2937	3954
YALI1_A05186r	83	0	2	0	0	0	0	0	0	0	0	0	0	0	0	0	0	0	0
YALI1_A05189r	72	0	0	0	0	0	0	0	0	0	0	0	0	0	0	0	0	0	0
YALI1_A05210g	885	465	701	401	241	240	261	908	411	640	127	220	22	210	293	223	518	386	477
YALI1_A05220g	321	1416	1444	967	803	771	749	1896	1195	1818	502	727	49	774	1147	690	2336	1297	1874
YALI1_A05229g	858	595	610	429	255	321	207	742	441	719	232	245	34	296	425	216	812	491	809
YALI1_A05254g	1395	4240	6174	3215	1680	2066	1324	20243	2951	3470	580	710	104	889	1481	653	2062	1785	1964
YALI1_A05259g	2088	153	86	70	51	73	65	161	87	158	42	51	6	54	112	105	178	120	136
YALI1_A05284g	201	18	18	10	8	4	6	17	14	25	2	6	0	3	4	3	33	10	28
YALI1_A05335g	4233	8012	6613	4225	3499	3291	2937	3533	4198	9933	2094	2626	277	2732	4857	4310	8167	5388	8534
YALI1_A05355g	756	475	271	190	171	165	132	223	233	411	97	120	3	111	230	168	353	255	307
YALI1_A05366g	2526	1423	941	602	486	441	414	598	699	1204	330	379	40	393	554	480	1022	684	922
YALI1_A05407g	969	2103	2249	1089	1060	1105	890	904	1246	3078	711	1114	147	1183	1646	1468	3212	2131	3080
YALI1_A05459g	2694	5414	5889	3183	2638	2835	2167	7657	3827	5979	3492	4239	556	5028	7843	5391	12226	8218	11882
YALI1_A05473g	492	1454	2048	1122	724	699	539	1479	1039	1657	700	960	127	1186	1533	1065	2963	1590	2661
YALI1_A05491g	312	1993	2331	1280	974	1027	726	2121	1257	2422	675	826	91	1001	1223	776	3271	1703	2712
YALI1_A05500r	90	0	0	0	0	0	0	0	0	0	0	0	0	0	0	0	0	0	0
YALI1_A05505r	92	1	2	0	0	0	0	4	0	4	0	0	0	0	0	1	2	0	4
YALI1_A05527g	3039	2960	4877	2316	1340	1412	1090	852	1222	4319	613	716	83	706	1251	905	2306	1262	1887
YALI1_A05571g	1098	2192	3392	1498	1116	1235	783	9291	1777	2255	459	471	70	693	1051	467	1594	1288	1397
YALI1_A05583g	360	411	412	195	154	138	119	154	285	492	139	156	17	191	266	289	510	271	517
YALI1_A05592g	495	683	475	330	152	210	206	167	394	646	140	143	20	156	247	268	393	327	434
YALI1_A05605g	2925	13307	11162	7466	6565	6472	5326	6423	7895	16721	4511	5315	695	6639	9877	9361	16593	11354	17636
YALI1_A05637r	72	0	2	2	0	0	0	0	0	0	0	0	0	0	0	0	0	0	0
YALI1_A05639r	83	3	3	0	0	2	3	2	0	2	0	0	1	0	2	0	0	0	0
YALI1_A05662g	1494	65	46	39	15	30	15	57	59	55	10	32	2	9	3	12	16	16	12
YALI1_A05684r	93	0	1	0	4	0	1	0	2	0	0	0	0	0	0	0	0	0	0
YALI1_A05694r	81	0	2	0	0	0	0	0	0	0	1	0	0	0	0	0	2	1	0
YALI1_A05701g	345	454	501	318	268	281	238	529	375	659	211	300	60	291	380	337	755	460	697
YALI1_A05718r	91	10	6	3	4	4	11	7	4	12	0	0	0	0	0	0	6	0	4
YALI1_A05723r	74	2	0	3	2	0	2	0	6	9	0	2	0	0	0	0	3	0	0
YALI1_A05737g	1152	181	106	85	119	111	77	140	93	216	78	124	4	57	71	68	216	129	184
YALI1_A05745r	74	0	2	0	0	0	0	0	0	0	0	0	0	0	0	0	0	0	2
YALI1_A05774g	2088	4537	4209	2519	1970	2025	1738	3260	2810	5782	1515	1746	153	1668	3052	2195	4572	3113	4659
YALI1_A05795g	1344	265	247	144	133	139	161	286	200	401	287	306	32	147	229	187	401	330	416
YALI1_A05798g	222	63	36	22	18	28	27	39	42	38	19	22	5	34	55	29	60	52	67
YALI1_A05813g	369	212	222	101	75	62	58	74	127	342	115	128	16	130	182	191	324	272	475
YALI1_A05821g	858	4079	3873	2289	1489	1588	1335	4934	2037	3956	1057	1154	163	1077	1787	1058	3316	2239	2987
YALI1_A05836g	489	14	19	7	8	9	8	9	15	27	6	9	0	6	12	3	21	17	17
YALI1_A05844g	495	2	9	5	6	9	2	2	2	12	0	3	0	1	5	8	5	2	10
YALI1_A05869g	213	97	212	70	46	54	30	50	56	129	58	78	12	97	175	76	248	144	254
YALI1_A05884g	1311	1213	2015	965	472	524	379	854	635	1341	948	1112	168	1315	1960	1458	3143	1866	2935
YALI1_A05904g	396	0	0	0	0	0	0	0	0	0	0	0	0	0	0	0	0	4	2
YALI1_A05927g	702	0	3	0	0	12	2	2	2	2	0	0	0	0	0	0	0	0	2
YALI1_A05933r	96	5	2	0	0	0	0	2	0	2	0	0	0	2	0	0	0	2	0
YALI1_A05947g	1188	3	2	2	7	4	6	10	0	10	3	2	2	6	8	2	16	2	5
YALI1_A05953r	72	0	0	0	0	0	0	0	0	0	0	0	0	0	0	0	0	0	0
YALI1_A05987g	1323	40	13	15	8	16	21	17	22	58	12	18	6	14	14	20	52	30	56
YALI1_A06019r	119	0	0	0	0	1	0	0	0	2	0	0	0	0	0	0	0	0	0
YALI1_A06020r	71	0	0	0	0	0	0	0	0	0	0	0	0	0	0	0	0	2	0
YALI1_A06024r	90	0	0	0	0	1	0	0	0	0	0	0	0	0	0	0	0	0	0
YALI1_A06032r	89	32	37	15	14	8	19	12	27	52	0	1	0	0	0	0	0	0	2
YALI1_A06052g	933	1303	1034	693	607	601	520	648	847	1740	507	451	69	401	747	727	1398	903	1217
YALI1_A06073g	996	3723	3205	1827	1928	1817	1444	2116	2007	4734	1201	1472	201	1670	2291	1974	4516	3078	4682
YALI1_A06081r	84	2	0	0	0	0	0	0	0	0	2	2	0	0	0	0	10	2	0
YALI1_A06099g	1416	71237	52623	33330	26184	21895	19621	31141	34755	58939	6822	6763	677	8126	17554	13241	17526	18997	20565
YALI1_A06102g	285	18	15	14	8	1	2	10	6	10	7	16	1	20	22	30	29	28	48
YALI1_A06104g	237	40	42	26	26	9	15	36	23	40	51	53	8	67	131	120	151	107	194
YALI1_A06116g	471	158	119	84	71	60	48	86	53	114	10	7	4	12	21	34	39	25	44
YALI1_A06128g	1545	3412	4152	2303	1579	1709	1315	11666	2699	3150	505	676	88	927	1431	726	2280	1753	2040
YALI1_A06149g	564	2037	2398	1499	1105	1133	818	3922	1548	2110	504	683	108	956	1470	524	2612	1571	2055
YALI1_A06169g	1110	2811	2691	1475	1273	1209	935	3638	1750	3067	712	927	82	981	1750	935	2916	1913	2568
YALI1_A06174g	312	800	666	335	344	389	286	575	519	852	288	265	37	269	395	361	729	574	867
YALI1_A06190r	83	6	6	2	0	0	1	0	1	1	6	10	0	6	4	4	9	2	14
YALI1_A06196g	297	103	77	45	32	49	16	42	61	124	28	23	6	28	42	37	75	44	79
YALI1_A06207g	474	73	61	32	49	18	26	70	59	89	37	41	0	44	41	28	95	66	86
YALI1_A06220g	588	43	36	19	30	36	14	27	44	40	0	23	0	18	26	18	42	18	34
YALI1_A06229g	1512	568	684	289	231	312	191	207	390	873	590	603	74	501	613	588	1458	898	1523
YALI1_A06287g	2322	2315	2696	1614	1075	1247	1023	5097	1998	2407	555	657	76	827	1139	850	1694	1667	2078
YALI1_A06311g	627	4924	5310	3351	4591	4339	2974	6961	5298	8481	690	1323	226	555	612	744	1806	990	1734
YALI1_A06327r	119	0	10	0	1	0	0	0	0	0	2	0	0	0	0	0	0	0	4
YALI1_A06361g	2793	18241	15997	9664	8690	8452	7424	2349	9311	26089	6986	7763	893	8700	13771	11226	24514	16877	24433
YALI1_A06381g	1092	1244	890	684	602	559	493	181	757	1663	316	375	53	343	665	581	985	710	1060
YALI1_A06384g	333	92	76	66	67	30	43	20	62	95	31	17	0	8	24	38	34	28	54
YALI1_A06396g	501	203	166	138	100	122	117	90	152	308	159	188	24	253	356	382	380	312	373
YALI1_A06402g	480	233	129	75	80	50	71	63	73	235	39	62	4	35	82	91	174	95	146
YALI1_A06416g	687	3173	3258	2525	3050	2146	1992	833	2495	7362	1412	2176	164	1998	3767	2367	6794	4199	5925
YALI1_A06423r	119	8	1	4	0	0	0	0	2	1	4	0	0	0	1	0	0	2	0
YALI1_A06434g	798	19141	17248	10977	8130	7777	6129	26113	10371	17553	3241	3824	512	3911	6375	4012	11199	7799	10136
YALI1_A06453g	1305	10626	7728	5049	4924	4614	4095	8742	6883	11951	1996	2393	276	3201	4711	3842	8725	5304	8132
YALI1_A06473g	384	3800	3167	2261	1803	1845	1485	3165	2564	4183	680	784	82	937	1542	913	2638	1941	2562
YALI1_A06488g	888	2698	2905	1703	1196	1222	1082	2804	1886	3306	906	1052	122	1196	1696	1240	3377	1998	3130
YALI1_A06530g	3429	73659	66528	27387	21133	21290	13915	27603	17764	84271	90150	99677	9875	129851	182375	203607	349773	164915	283378
YALI1_A06591g	1146	4058	4432	2048	1985	1957	1488	1035	2124	5667	1540	1781	267	2237	3101	2434	6052	4035	6291
YALI1_A06594g	510	3728	3482	1753	1485	1703	1214	653	1695	5864	1817	2035	232	2266	3986	2605	6375	4246	6089
YALI1_A06612g	972	1258	1064	463	406	511	355	63	483	1505	351	459	60	542	696	635	1631	880	1371
YALI1_A06615g	240	158	164	78	74	76	58	9	106	209	61	113	11	113	103	100	319	138	268
YALI1_A06625g	303	165	110	54	41	52	28	83	40	172	27	23	8	30	23	33	71	65	76
YALI1_A06634g	798	210	164	89	73	85	69	112	77	247	62	35	2	44	52	52	122	51	81
YALI1_A06640g	1119	1173	717	772	525	550	482	348	594	1794	350	355	32	293	456	725	1263	629	945
YALI1_A06666g	1101	1525	1446	936	665	722	631	1702	934	1983	441	432	53	524	774	472	1273	932	1348
YALI1_A06672g	3465	13572	9835	8036	7835	7003	6158	9488	8774	19921	3273	4307	454	5514	8728	8172	13869	10080	14032
YALI1_A06710r	72	0	0	0	0	2	0	1	2	3	0	0	0	0	0	0	0	0	0
YALI1_A06721g	972	3560	3918	2191	1730	1527	1354	3669	2190	4523	1180	1526	182	1639	2551	1621	4541	2559	4020
YALI1_A06735g	282	264	287	154	133	143	79	164	171	335	68	106	5	114	171	122	307	160	360
YALI1_A06743g	495	7908	8141	4544	3775	4157	2987	10715	5343	8666	1870	2331	324	3005	3963	2430	8497	5060	7182
YALI1_A06751g	606	1529	1081	798	662	837	544	632	915	1717	466	454	51	559	658	843	1084	1019	1410
YALI1_A06761g	483	659	362	282	264	221	201	205	343	600	117	107	23	126	168	169	240	199	354
YALI1_A06778g	2634	7417	6636	4018	2852	2913	2662	1561	3754	9144	2002	2301	313	2590	3582	3579	6184	5047	6925
YALI1_A06815g	456	278	248	132	137	164	140	47	131	577	179	245	13	185	298	330	735	423	741
YALI1_A06818g	246	202	227	110	80	101	73	49	86	348	145	165	28	122	235	182	467	256	458
YALI1_A06823g	1662	386	302	169	222	224	222	134	231	651	191	304	35	231	402	357	733	574	820
YALI1_A06873g	2283	32	13	14	14	21	21	14	25	35	0	4	0	2	4	6	2	4	8
YALI1_A06883r	100	8	16	6	1	7	7	14	16	11	0	0	0	2	2	0	0	0	0
YALI1_A06888r	89	0	0	0	0	0	0	2	1	2	0	0	0	0	0	0	0	0	0
YALI1_A06928r	119	0	0	0	0	0	0	0	0	0	0	0	0	0	0	0	0	0	0
YALI1_A06929r	71	0	0	0	0	0	0	0	0	0	0	0	0	0	0	0	0	1	0
YALI1_A06936r	72	0	0	0	0	0	0	0	0	0	0	0	0	0	0	0	0	0	2
YALI1_A06939r	82	0	0	0	0	0	0	2	0	0	2	0	0	0	0	0	0	0	2
YALI1_A06957r	86	0	2	0	0	0	0	0	3	0	0	0	0	2	0	0	0	0	0
YALI1_A06958g	828	4334	5911	3579	2567	2422	1851	4482	2816	6539	2896	3383	343	3065	5947	3196	9812	5830	8346
YALI1_A06989g	1875	228	157	156	120	92	107	50	144	255	87	96	11	44	100	87	199	119	183
YALI1_A07014g	1791	454	405	174	275	281	204	139	290	626	157	226	32	223	352	318	609	344	603
YALI1_A07038r	83	4	0	4	0	0	0	5	2	5	6	0	0	2	12	1	14	12	16
YALI1_A07044r	88	0	0	0	0	0	0	0	0	0	0	0	0	0	0	0	0	0	0
YALI1_A07051g	1959	443	394	230	130	155	110	226	252	545	529	466	77	538	870	724	1394	900	1609
YALI1_A07103g	1584	0	0	0	0	0	0	0	0	0	0	0	0	0	0	0	2	0	0
YALI1_A07137g	2157	708	709	455	306	299	296	437	455	780	339	409	61	610	809	808	1363	945	1370
YALI1_A07161g	426	62	58	49	24	23	25	37	29	57	65	71	5	81	81	83	144	130	179
YALI1_A07171g	420	63	48	35	41	33	36	42	29	47	42	30	3	88	98	117	206	137	197
YALI1_A07201g	1395	708	764	339	343	422	268	306	546	890	272	281	46	268	390	575	785	529	911
YALI1_A07226g	552	34	29	18	21	20	13	7	24	36	11	6	0	4	14	10	33	13	44
YALI1_A07241g	1038	249	194	129	112	146	119	85	141	325	81	107	11	105	103	102	305	178	276
YALI1_A07267g	2307	8877	7434	4677	3752	3822	3207	2504	4557	11674	2711	3223	396	3558	5529	4363	9701	6219	9180
YALI1_A07277g	216	4	0	0	0	2	0	0	0	0	0	0	0	0	0	1	0	2	0
YALI1_A07290g	834	11838	8204	4357	4798	4333	3637	3495	4823	14954	4899	5576	672	5131	9438	6978	17118	10197	16494
YALI1_A07309g	756	2985	2191	1554	1138	1173	1209	830	1524	3137	2687	2815	287	2597	4153	2963	7398	4217	7720
YALI1_A07318g	411	311	212	154	124	115	161	54	180	386	116	165	18	112	197	171	332	229	368
YALI1_A07326g	357	4241	5029	2581	1457	1477	1381	3749	2139	4456	1081	1145	120	1057	1791	799	3434	2143	2987
YALI1_A07349g	1452	1337	1955	1076	703	844	583	260	889	1860	1047	1419	193	1681	2001	1608	4137	2381	3643
YALI1_A07357g	522	386	404	292	147	162	174	64	214	544	502	627	84	579	991	857	1573	994	1693
YALI1_A07372g	240	90	81	54	31	23	13	12	47	125	171	196	25	174	265	244	437	236	450
YALI1_A07376g	282	77	95	44	32	30	30	61	56	71	37	45	2	45	45	67	134	101	134
YALI1_A07381g	2058	1420	1010	737	727	729	715	1189	1085	1866	314	550	60	658	1006	803	1402	1203	1635
YALI1_A07405g	459	482	503	275	244	218	198	328	288	542	169	189	25	224	327	251	559	376	638
YALI1_A07418g	801	199	140	171	80	114	99	324	175	188	0	8	0	2	2	10	10	28	6
YALI1_A07421r	89	0	0	0	2	0	0	0	0	0	1	0	0	0	0	0	0	0	2
YALI1_A07425r	82	0	1	0	0	0	0	0	0	0	0	0	0	0	0	0	0	0	0
YALI1_A07472g	4326	16401	11183	8397	7412	6807	5978	811	6770	23856	5952	7136	813	7579	11947	11051	21213	14186	21351
YALI1_A07538g	1410	2206	1464	1016	1045	1130	930	794	1183	3094	1219	1642	177	1565	2524	2328	4580	3305	4384
YALI1_A07557g	375	121	99	70	54	54	36	40	36	179	87	73	12	62	186	130	278	202	262
YALI1_A07575g	1881	2201	1686	1180	1935	2120	1554	10984	2674	3631	2661	2979	344	4708	5767	6640	8332	7599	11136
YALI1_A07608g	201	512	389	296	302	212	203	320	280	691	137	182	14	173	374	176	546	389	607
YALI1_A07624g	1314	5653	4765	3281	2923	2987	2525	4193	3209	6706	1302	1425	172	1989	2504	2620	4632	2987	4676
YALI1_A07632g	450	354	287	140	133	102	113	90	174	402	150	164	8	143	274	233	487	272	337
YALI1_A07635g	519	432	371	214	151	154	145	120	257	379	141	154	12	204	363	289	469	363	414
YALI1_A07649g	984	32538	30531	17391	17841	16430	13250	30870	18622	42824	10169	12662	1471	14246	24103	17193	40293	25460	35614
YALI1_A07668g	1200	4550	3994	2334	1789	1868	1498	2686	2374	5049	1218	1219	182	1457	2112	1840	4287	2544	4064
YALI1_A07681g	492	1069	1134	540	397	363	319	514	556	1046	273	306	49	281	522	389	893	519	882
YALI1_A07712g	927	5442	8701	4683	2975	2844	2362	14273	4057	6590	1036	1240	173	1654	2969	1135	4012	2979	3217
YALI1_A07730g	375	1304	1908	994	656	638	599	5895	1294	1287	226	280	39	513	642	284	1048	783	904
YALI1_A07766g	294	118	79	54	36	35	32	39	56	141	9	23	2	15	35	36	85	77	112
YALI1_A07768g	4344	8018	7583	4737	3473	3566	3222	3660	4302	10115	3291	4182	710	5778	8081	7239	14482	8918	14565
YALI1_A07829g	486	5	8	0	3	1	0	4	2	4	2	14	4	4	0	1	4	7	3
YALI1_A07842r	119	0	0	0	0	0	0	0	0	0	0	0	0	0	0	0	0	0	0
YALI1_A07887g	1050	0	0	0	0	0	2	0	0	4	4	10	0	2	0	4	2	2	2
YALI1_A07937g	1416	4909	5296	3166	2625	2741	2003	4540	3471	6069	2054	2395	485	4074	5310	3471	9385	5658	9076
YALI1_A07977g	4080	9190	7170	5237	4546	4271	4121	5006	5755	11722	2896	3608	492	4845	6595	6650	11361	7921	11853
YALI1_A08027r	86	0	0	1	0	0	0	0	0	0	0	0	0	0	0	0	8	3	2
YALI1_A08047g	354	6	3	4	0	6	1	0	6	0	0	0	0	0	0	0	0	0	0
YALI1_A08049g	219	6	2	0	0	0	0	0	1	6	0	1	0	0	0	0	3	0	0
YALI1_A08065g	627	113	55	26	30	18	22	23	51	73	35	45	6	23	37	17	133	66	123
YALI1_A08073g	1602	209	157	143	136	127	82	33	109	264	433	341	43	279	271	314	774	311	513
YALI1_A08107g	480	644	316	280	212	193	185	211	325	573	110	107	7	81	147	152	175	196	241
YALI1_A08115g	297	763	352	241	137	152	122	217	318	603	132	64	8	78	146	109	186	159	242
YALI1_A08126g	1695	188	109	75	75	42	62	59	114	168	80	49	2	74	110	137	141	213	220
YALI1_A08175g	3219	2914	8056	3968	1436	1632	1265	4300	2020	3495	1467	2016	292	2723	4467	3041	5869	4136	6021
YALI1_A08197g	468	89	90	62	42	35	29	123	62	90	21	42	1	28	32	26	139	72	79
YALI1_A08206g	993	1753	2441	1355	820	965	793	6369	1535	2162	853	970	138	1135	2032	1552	3087	2016	2880
YALI1_A08299g	693	0	0	0	0	0	0	0	0	0	0	0	0	0	0	0	0	0	0
YALI1_A08341t	2145	6	0	2	0	0	0	2	0	8	0	0	0	0	11	0	0	3	1
YALI1_A08362t	3903	5	4	1	4	1	0	1	0	0	1	10	0	0	2	2	6	2	10
YALI1_A08424g	1692	1216	818	592	525	533	480	1953	995	1778	155	174	17	170	277	208	728	481	686
YALI1_A08434r	101	1	0	0	0	0	0	0	0	0	0	0	0	0	0	0	2	0	0
YALI1_A08436g	1845	3162	2853	1918	1950	1962	1546	2158	2342	5239	1098	1533	229	1878	3213	2552	5134	3302	4872
YALI1_A08467g	930	347	366	187	145	125	189	184	253	425	513	643	64	651	1086	605	1926	1051	1710
YALI1_A08468g	1050	1381	2183	1093	603	793	599	2326	977	1657	440	512	58	671	772	630	1609	1097	1533
YALI1_A08483r	74	9	31	13	2	6	0	14	15	21	4	6	1	7	12	14	28	14	21
YALI1_A08486g	399	14	4	4	0	2	6	6	2	8	4	14	0	8	6	4	31	12	14
YALI1_A08502g	1089	6763	6889	3899	2957	3049	2382	4457	3671	8689	2693	2943	328	3236	6151	3830	9439	6137	8295
YALI1_A08512g	933	1285	1278	752	675	712	570	1475	945	1869	462	506	82	508	750	618	1505	955	1461
YALI1_A08532g	309	24	14	12	29	17	24	4	24	84	22	23	7	32	48	49	95	80	114
YALI1_A08542r	86	1	1	0	0	0	1	0	1	0	0	0	0	2	0	0	2	0	1
YALI1_A08546g	1347	8407	7333	3506	3682	3946	3262	1611	3422	14443	3514	4253	494	4322	7537	4527	13504	7849	13034
YALI1_A08573r	43	0	0	0	0	0	0	0	0	0	0	0	0	0	0	0	0	0	0
YALI1_A08574r	86	0	0	0	0	0	0	0	0	0	0	0	0	0	0	0	0	0	0
YALI1_A08614g	1113	8	4	6	8	4	2	0	0	13	6	10	0	12	12	6	6	4	6
YALI1_A08620r	96	0	2	0	0	0	0	0	0	0	0	0	0	0	2	0	1	0	2
YALI1_A08623g	249	21	11	11	16	4	6	17	6	19	12	15	0	12	33	21	35	12	22
YALI1_A08653g	297	2	3	0	0	1	0	6	7	1	0	0	0	0	0	0	0	0	0
YALI1_A08661r	123	0	0	0	2	0	0	2	0	0	0	0	0	0	0	0	0	0	0
YALI1_A08662r	70	0	0	0	0	0	0	0	0	0	0	0	0	0	0	0	0	0	0
YALI1_A08672g	1728	66	39	14	30	13	19	12	28	80	13	10	0	6	4	8	35	21	23
YALI1_A08729g	3870	22245	13427	10295	11875	10913	10299	14044	14867	28328	3412	4133	433	4842	8167	7309	12546	9103	13434
YALI1_A08759g	324	1620	1967	1100	658	773	502	2454	1145	1986	480	402	36	521	859	374	1499	989	1417
YALI1_A08781g	1398	7298	5715	4008	3451	3259	2863	8781	4503	7666	1588	1902	222	2066	3375	2604	5769	3902	5457
YALI1_A08787g	1392	6774	5270	3544	3749	3215	2898	4202	3765	9533	2719	3032	258	3101	6409	4647	9616	6984	8899
YALI1_A08821g	597	114	133	68	69	36	47	68	66	105	28	54	0	36	68	60	133	102	157
YALI1_A08828g	447	1270	1321	753	685	726	571	666	785	1969	1109	1219	181	1315	1746	1630	3699	2311	3704
YALI1_A08835g	441	697	720	362	261	297	212	293	399	695	145	178	18	175	201	244	485	340	585
YALI1_A08856g	999	4231	4329	2349	1650	2028	1618	2313	2018	6037	883	1091	138	1148	1741	1628	3201	2216	3325
YALI1_A08873r	72	6	11	6	3	6	4	3	1	2	1	3	2	4	9	3	15	2	13
YALI1_A08875g	312	16	18	3	4	2	7	8	13	14	14	23	4	13	40	21	43	41	62
YALI1_A08890r	89	1	1	1	2	4	5	0	5	9	1	1	0	1	0	3	6	4	9
YALI1_A08901g	201	34	28	15	39	10	23	15	21	35	8	12	1	7	5	21	34	13	20
YALI1_A08931g	243	40	45	27	14	23	30	26	32	56	20	14	2	13	28	33	40	36	46
YALI1_A08934g	519	218	133	69	60	71	74	55	80	253	81	79	6	73	71	73	159	79	225
YALI1_A08941g	216	84	39	22	19	8	16	8	24	75	23	30	4	14	20	16	62	33	54
YALI1_A08951r	90	0	2	0	0	0	0	0	0	0	0	0	0	0	0	0	0	0	0
YALI1_A08981g	1635	52	10	21	40	16	28	18	25	53	4	11	0	10	8	16	22	24	10
YALI1_A09010g	888	2700	2513	1514	1207	1312	1133	730	1567	3954	1481	1656	176	1346	2205	1655	4622	2761	4133
YALI1_A09021g	540	171	136	129	70	79	63	27	71	177	49	53	15	51	56	51	49	58	93
YALI1_A09064g	1566	31780	28814	13801	12528	12639	9286	495	9437	44457	44448	61912	7236	78124	108478	77662	177365	100037	161460
YALI1_A09100g	1299	1974	2472	1142	853	963	869	493	1398	2650	763	851	105	1192	1438	1365	2819	2018	3047
YALI1_A09121g	1386	1478	1578	869	759	860	658	1593	1010	2007	452	562	75	620	1113	678	1642	1173	1523
YALI1_A09139g	288	3258	3401	1994	1021	1169	983	3880	2056	2737	927	1095	142	1098	1481	833	2847	1736	2588
YALI1_A09149g	300	18	13	16	26	18	15	19	13	21	4	0	0	8	2	2	6	10	8
YALI1_A09165g	540	54	21	26	16	14	6	15	20	30	0	2	0	3	1	4	17	4	8
YALI1_A09166g	711	821	566	380	271	270	260	232	458	850	144	143	14	125	248	166	378	283	407
YALI1_A09190g	516	7	9	13	13	3	4	0	0	26	6	8	4	2	18	2	17	8	23
YALI1_A09218g	4371	2098	2368	1493	1010	937	897	1209	1310	2648	605	696	67	743	1154	1044	2043	1668	2221
YALI1_A09325g	1209	475	259	224	195	131	159	238	190	356	3156	3386	505	5435	6989	6299	9178	7073	10701
YALI1_A09372g	1329	11181	11533	6076	4669	5226	4199	9997	5432	15081	4272	4691	659	5448	8538	6095	14626	9449	14161
YALI1_A09397g	897	88	51	46	32	30	18	69	40	80	28	46	0	38	36	21	103	18	104
YALI1_A09408g	822	3749	4840	2627	1596	1549	1290	5411	2629	4085	1010	1175	97	1147	2152	1023	3443	2268	3068
YALI1_A09422g	1746	18729	16986	9359	7698	7442	6315	7604	9027	23025	5539	6034	628	6534	11093	9168	17555	11950	18585
YALI1_A09444g	1191	3207	3315	1716	1366	1509	1061	2613	1740	4032	981	1078	117	957	1703	1344	2935	2295	3137
YALI1_A09467g	2118	10306	9578	5223	4055	3960	3338	3032	4949	12898	3273	3513	431	3363	5729	4331	10315	6758	10246
YALI1_A09522g	2973	2134	3948	2250	870	968	815	2876	1623	2373	696	925	149	1147	1733	1280	2559	1801	2565
YALI1_A09524g	651	751	1505	675	335	427	245	1181	437	830	524	509	72	579	959	537	1744	1077	1372
YALI1_A09553g	954	35469	36118	19135	11601	9338	7936	13612	13801	24946	92	97	26	64	216	68	205	258	168
YALI1_A09576g	1137	7956	6046	3934	3163	3095	2483	5123	3861	8465	2431	2386	294	2413	3917	3019	6215	4061	6205
YALI1_A09593g	1374	11567	11925	7086	6394	6215	4842	52994	9639	16396	1349	1454	140	1767	2805	2452	4298	3777	5440
YALI1_A09626g	1413	4569	4208	2395	1701	1707	1283	3825	2420	4841	1311	1299	220	1461	2410	1877	3955	2489	4039
YALI1_A09638g	534	6213	7501	4198	3390	3666	2942	7715	4361	8704	2653	3201	446	4339	5549	3633	11067	6080	8551
YALI1_A09654g	363	3079	3326	1850	1402	1376	1074	4691	2343	3234	913	1067	128	1177	1877	1027	3480	1971	2719
YALI1_A09694g	2985	19348	15306	9965	8765	10118	7752	10706	11861	24143	4139	4928	657	5318	9088	7047	14472	9391	14497
YALI1_A09741g	831	3249	2848	1655	1518	1602	1200	2514	2129	4281	1003	1069	116	1125	1768	1334	3206	2262	3133
YALI1_A09766g	1734	37398	29099	17098	15247	14734	12190	25531	16582	46981	10714	12224	1218	12063	22090	17186	37660	23073	37603
YALI1_A09776g	336	193	197	76	80	95	60	78	104	275	67	89	10	72	182	185	291	226	326
YALI1_A09787g	516	371	336	207	185	243	167	172	319	415	96	130	30	198	234	299	484	365	550
YALI1_A09789g	261	215	195	81	89	67	67	110	167	182	81	139	20	133	193	217	301	253	430
YALI1_A09798g	372	70618	107348	46731	29546	31766	21269	137556	42639	73134	20459	24068	3529	27564	41443	18940	71453	41961	58289
YALI1_A09856g	2331	7536	6259	3641	2942	3027	2506	6774	4015	8445	1273	1608	191	1692	2837	2351	4609	3258	4685
YALI1_A09893g	1050	8041	5336	4005	3616	3171	2821	830	3375	9922	3287	3443	372	3363	6428	4541	9325	6450	9684
YALI1_A09911g	1221	3421	3334	1728	1403	1508	1151	1577	1888	4154	1365	1541	140	1446	2293	1815	4271	2697	4453
YALI1_A09919t	540	56	59	48	48	10	25	46	34	72	19	29	0	32	34	15	60	56	63
YALI1_A09939g	1338	11782	11482	6320	5075	4941	4018	9779	6587	14794	3969	4472	579	4701	7414	5256	13076	7862	12260
YALI1_A09949g	957	4973	4516	2517	2341	2318	1748	1692	2649	6911	1939	2222	268	2306	3697	2960	7197	4271	7180
YALI1_A09996g	1854	1521	1391	795	528	579	480	502	899	1854	726	696	55	715	1410	1022	1849	1437	2229
YALI1_A10015g	1551	4276	4228	2339	1632	1709	1385	4127	2762	4510	1047	1195	173	1343	1903	1363	3423	2359	3648
YALI1_A10022g	1365	1994	1886	1146	910	940	848	1527	1483	2893	554	708	83	688	1073	848	1933	1251	2036
YALI1_A10039g	2244	2104	2434	1258	1005	1048	857	1201	1318	3121	909	1171	129	1176	1897	1770	3264	2097	3140
YALI1_A10072g	1212	30	31	18	17	12	8	14	19	33	1	0	2	0	2	4	10	11	10
YALI1_A10105g	1965	8933	6958	4621	3971	4332	3565	4773	4977	9938	2656	2852	358	3095	5054	4620	8260	5660	8446
YALI1_A10143g	1392	2213	2853	1568	895	1069	732	7960	1668	2143	384	425	38	489	863	555	1214	1117	1210
YALI1_A10146g	543	4672	4136	2512	1991	1906	1450	3058	2226	5393	1331	1465	157	1312	2518	1374	4646	2832	4256
YALI1_A10199g	3993	2085	1382	962	793	862	1017	545	1990	3002	1227	1381	161	1568	2644	2194	4193	3274	4547
YALI1_A10254g	906	6075	6181	4018	2681	2770	2086	5272	3576	6162	1593	1828	293	2258	2910	1803	5149	3423	5084
YALI1_A10267g	3021	4985	4164	2883	2247	1979	1915	2879	2805	6079	1330	1603	226	1750	2553	2085	4531	3045	4598
YALI1_A10309r	73	1	8	0	0	0	0	0	1	0	2	1	0	0	0	0	0	5	0
YALI1_A10318g	2538	36172	32536	22354	20410	18562	16934	3582	18780	62923	22557	27881	3062	28971	51577	37899	84138	52962	80722
YALI1_A10365g	1161	0	0	0	2	0	2	1	2	0	0	2	0	0	0	0	0	0	0
YALI1_A10448g	210	116	83	73	37	35	39	55	50	134	50	47	0	38	73	65	135	77	131
YALI1_A10468g	1560	1063	651	466	455	455	383	469	438	1038	281	412	40	364	550	583	996	644	832
YALI1_A10473g	237	238	190	127	124	104	96	163	142	220	56	76	7	116	102	112	198	127	227
YALI1_A10483r	116	0	0	0	0	0	0	0	0	0	0	0	0	0	0	0	0	0	0
YALI1_A10510g	1080	4994	4855	2999	2612	2577	2193	3320	2953	7466	1759	1945	209	2248	3411	2311	6267	3979	5647
YALI1_A10529g	480	1566	1668	1052	819	823	614	1604	1177	1858	401	743	62	855	1196	673	2735	1462	2115
YALI1_A10565g	1911	90	96	41	32	43	36	37	59	118	4	25	3	8	10	20	28	23	29
YALI1_A10619g	2403	15697	14333	8367	7308	7390	6022	17677	9193	18298	3603	4632	497	5113	8322	6253	14322	10223	13259
YALI1_A10672g	2523	7302	5761	3355	3095	3225	2621	2573	3839	9632	1603	2052	265	2190	3329	2952	6213	4740	6983
YALI1_A10708g	909	32728	62129	25327	21882	25882	13650	128064	22816	47823	22483	34998	5222	45843	62491	31681	108211	63953	87472
YALI1_A10784g	1176	2833	2899	1701	1823	1743	1337	1944	1444	6029	1207	1449	193	1773	2353	2571	5167	3544	5328
YALI1_A10796g	261	339	304	214	217	221	195	379	226	594	116	191	27	252	287	374	621	477	736
YALI1_A10798g	1107	1902	1882	1243	1288	1186	1018	1649	1096	3522	1260	1439	261	1752	2045	1886	4981	2629	4949
YALI1_A10827g	579	36609	55771	29042	25977	26315	18596	106843	33833	48368	10123	15518	2463	22625	33724	15124	60456	37060	46142
YALI1_A10857g	354	65737	40929	26278	30065	28219	23388	9303	32642	81439	14211	16299	2009	19566	26406	26987	49836	27841	46929
YALI1_A10883g	3207	149	85	76	53	84	53	13	85	211	36	57	2	43	61	79	137	52	149
YALI1_A10907g	795	3612	3080	2030	1764	1966	1385	1082	1977	4841	1066	1460	193	1659	2835	1694	5075	2675	4097
YALI1_A10921r	93	1	0	0	0	2	0	0	0	0	0	2	0	0	0	1	1	0	0
YALI1_A10934g	489	13214	13527	6943	6068	5822	4514	10940	7485	16338	4491	4971	587	6079	10346	6051	17003	9988	15233
YALI1_A10943r	119	0	4	0	0	2	0	0	0	0	0	0	0	0	1	0	0	0	0
YALI1_A10966g	1176	4	4	1	0	0	4	1	4	2	0	4	0	0	0	0	0	0	0
YALI1_A11010g	396	14	32	9	6	11	2	8	13	24	3	0	0	7	11	9	18	10	26
YALI1_A11043g	1344	61	21	46	29	14	35	46	38	67	7	3	0	2	2	2	2	16	4
YALI1_A11068g	471	109	108	81	41	28	27	44	66	73	19	20	3	36	24	40	69	40	51
YALI1_A11079g	474	684	777	423	232	307	217	963	744	810	188	172	20	156	211	242	653	451	576
YALI1_A11114g	1821	2050	1678	1136	882	945	800	1800	1379	2566	382	516	72	579	791	781	1463	1264	1654
YALI1_A11141g	534	22	22	41	15	10	15	20	20	44	8	4	4	4	22	7	20	16	24
YALI1_A11165g	288	92	39	30	23	62	21	41	50	65	16	16	4	4	11	12	50	25	23
YALI1_A11178r	90	4	2	0	3	1	1	0	1	2	0	1	0	2	3	3	2	4	7
YALI1_A11182g	885	381	308	164	164	198	172	141	191	456	102	149	12	91	126	171	331	175	314
YALI1_A11218g	2376	3555	3744	2065	1365	1522	1171	2153	1762	4380	1265	1488	208	1572	2418	1933	4228	3136	4067
YALI1_A11231g	522	1055	1123	687	615	561	456	736	783	1649	261	345	22	339	555	363	1075	696	883
YALI1_A11258g	1152	7635	7159	4111	4487	4248	3513	7061	4499	10957	2135	2867	306	3436	6092	3762	10964	6786	9741
YALI1_A11270g	1467	19432	17127	9824	10296	9268	7228	17534	10209	27148	6783	8265	972	9019	15716	11026	28150	16808	23926
YALI1_A11293g	531	348	279	153	178	197	114	142	222	397	164	168	27	175	215	187	409	281	458
YALI1_A11303g	528	292	321	216	119	139	145	230	228	420	172	196	13	161	270	211	423	233	462
YALI1_A11341g	2118	2022	1646	1207	778	849	827	1150	1054	2247	645	916	142	1359	1483	1889	3015	1961	2705
YALI1_A11345g	426	71	42	45	29	36	33	72	33	93	55	56	0	29	55	55	124	93	78
YALI1_A11355g	774	242	172	118	76	76	75	264	122	277	77	98	7	88	141	64	233	123	258
YALI1_A11357r	87	0	0	0	0	0	0	2	0	0	0	0	0	0	0	0	0	0	2
YALI1_A11394r	90	0	0	0	0	0	0	0	0	0	0	0	0	0	0	0	0	0	0
YALI1_A11415g	1878	3228	3938	2250	1604	1944	1209	9119	2489	3247	624	728	104	819	1062	856	2191	1606	2332
YALI1_A11418r	92	0	0	0	0	0	0	0	0	0	0	0	0	0	0	0	0	0	0
YALI1_A11439g	3765	93	82	30	64	74	81	76	160	151	144	80	10	295	532	415	478	204	275
YALI1_A11481r	77	0	0	0	0	0	0	0	0	0	0	0	0	0	0	0	0	0	0
YALI1_A11500g	999	1183	2675	1246	528	647	485	1411	728	1554	855	989	147	1275	1841	1168	3285	1790	2572
YALI1_A11506g	2892	965	1304	864	430	451	423	849	731	1262	442	615	90	736	1296	930	1793	1268	1803
YALI1_A11557g	372	4	0	0	0	0	0	0	0	0	0	2	0	0	0	0	2	2	0
YALI1_A11568g	267	5	4	0	0	2	4	0	1	3	2	1	0	1	2	0	1	0	0
YALI1_A11588g	318	83	37	23	28	15	26	16	47	113	5	5	0	2	8	2	13	4	12
YALI1_A11612g	1710	348	254	192	162	160	132	159	201	445	85	157	8	145	293	223	431	333	376
YALI1_A11622g	285	98	109	51	46	40	40	30	66	109	48	59	2	35	54	38	94	63	107
YALI1_A11643g	291	205	121	118	63	75	83	96	125	189	19	24	2	13	16	25	28	29	59
YALI1_A11654g	1605	949	629	450	326	323	296	419	531	867	127	95	18	119	172	166	251	143	347
YALI1_A11676g	513	23	10	1	0	0	0	13	2	2	2	2	0	2	2	2	4	4	8
YALI1_A11723g	693	0	2	0	0	0	0	0	0	0	0	0	0	0	0	0	2	0	0
YALI1_A11745g	963	2	2	0	2	6	2	4	2	2	0	0	0	0	0	2	4	0	0
YALI1_A11797g	2607	243	127	122	144	140	149	126	147	359	85	104	9	28	54	86	187	76	120
YALI1_A11821g	336	394	351	173	111	158	129	126	206	359	163	166	17	103	243	182	401	234	350
YALI1_A11833g	270	544	409	292	196	262	170	226	355	610	168	227	20	226	328	275	437	345	529
YALI1_A11854g	1797	1631	1185	766	782	743	622	727	933	2013	547	722	47	833	1297	965	1718	1211	1814
YALI1_A11876g	345	154	140	62	64	54	59	102	120	196	49	64	5	48	65	46	143	98	156
YALI1_A11880r	84	71	56	29	27	21	31	53	47	94	36	23	0	29	41	42	65	46	83
YALI1_A11905g	615	99	50	84	81	58	52	69	52	102	153	302	22	179	400	269	678	309	416
YALI1_A11954g	1860	10	6	3	0	6	2	4	4	6	0	2	2	0	4	6	22	14	10
YALI1_A11966t	2145	0	0	0	0	0	1	0	0	1	0	0	0	0	0	2	0	4	0
YALI1_A11988t	3903	4	4	1	2	0	4	0	1	4	1	0	0	1	0	4	13	0	2
YALI1_A12037g	1998	36	18	15	11	30	14	19	15	62	74	90	8	76	115	126	216	220	231
YALI1_A12067g	969	45	28	16	49	34	35	18	47	70	0	11	3	4	2	8	12	12	17
YALI1_A12085g	720	1	0	0	6	0	0	6	0	4	0	0	0	0	1	0	0	0	0
YALI1_A12099g	3783	4766	4218	2746	2202	2232	1810	3070	2559	5584	1513	1921	210	1965	2857	2168	5761	3198	5464
YALI1_A12138g	660	237	227	125	93	77	42	125	120	280	36	50	0	51	102	52	165	97	121
YALI1_A12152g	258	196	172	102	49	53	63	87	126	178	11	13	4	8	40	46	57	31	58
YALI1_A12167g	645	873	843	493	370	401	351	678	544	1142	421	421	46	359	596	531	1112	688	1134
YALI1_A12177r	81	0	7	1	2	1	6	0	8	5	2	0	0	2	4	2	9	6	21
YALI1_A12225g	4038	6218	6649	4041	2961	3202	2404	18324	4963	6073	857	1181	155	1686	2453	1652	3400	3241	3509
YALI1_A12245g	879	3283	2818	1922	1564	1560	1433	2608	1644	4224	840	1039	133	1151	1502	1633	3142	2178	3357
YALI1_A12284g	498	4446	4868	2826	2792	2474	2000	5028	2790	6953	1888	2438	289	2806	4281	2855	8226	4842	7208
YALI1_A12294g	576	905	907	414	418	455	361	505	529	1222	207	244	40	163	340	224	598	456	693
YALI1_A12302g	621	4706	6160	3298	2041	2049	1580	17012	2966	3958	804	1036	127	1401	2161	867	3427	2525	2997
YALI1_A12356g	1680	1915	2342	1350	777	718	678	1662	1245	2356	764	1000	156	1218	1683	1401	3128	2225	3434
YALI1_A12403g	1443	3990	5835	3012	1945	2145	1708	16043	3212	3988	885	1062	179	1448	2251	1219	3640	2799	3179
YALI1_A12411g	1221	4769	6750	3240	2489	2766	2071	19520	3729	4750	1024	1141	187	1660	2296	1156	3964	2740	3324
YALI1_A12437g	1149	5159	8811	6053	5417	4029	3818	1304	3427	11820	5406	7850	801	9752	14344	11475	24350	15666	22038
YALI1_A12445g	576	202	213	147	126	86	112	37	120	280	82	156	15	198	279	216	501	336	569
YALI1_A12465g	816	134	205	144	39	67	48	111	70	118	39	81	6	93	171	167	261	141	220
YALI1_A12475g	1623	284	446	261	140	164	126	187	129	305	147	169	20	234	384	291	518	314	447
YALI1_A12492g	420	131	250	111	70	57	47	106	68	137	54	94	9	116	159	111	259	187	300
YALI1_A12502g	2448	3037	2927	1869	1400	1509	1229	2252	1797	3975	904	1202	149	1326	2071	1659	3629	2461	3469
YALI1_A12530r	96	2	0	0	0	0	0	1	0	0	0	0	0	0	0	0	0	0	0
YALI1_A12540g	1107	96	85	44	76	81	56	63	82	242	29	67	8	39	34	47	140	89	94
YALI1_A12597r	81	0	0	0	0	1	0	0	0	0	0	0	0	0	0	0	0	0	0
YALI1_A12601g	453	41	53	34	24	10	10	52	47	39	12	3	2	6	47	19	40	38	36
YALI1_A12617g	1053	1294	971	709	470	442	414	904	767	1490	289	237	18	257	581	425	740	578	678
YALI1_A12629r	119	0	4	0	0	2	0	0	0	0	0	0	0	0	0	0	1	1	1
YALI1_A12630r	81	0	0	0	0	0	0	0	0	0	0	0	0	0	0	0	0	0	0
YALI1_A12638g	729	837	1377	769	414	376	285	663	549	1030	268	299	22	385	662	312	1141	623	991
YALI1_A12676r	86	0	0	2	0	0	0	0	0	12	4	0	0	4	0	6	13	7	16
YALI1_A12688g	1902	178	112	93	82	91	90	60	111	185	107	138	26	100	156	136	329	176	303
YALI1_A12729g	1392	1567	1662	878	940	1032	800	1345	1059	2473	777	1085	127	1008	1617	1127	2894	1923	2946
YALI1_A12754r	81	11	15	9	2	2	1	2	7	5	10	9	1	9	9	10	13	13	18
YALI1_A12756g	831	97	63	50	40	30	24	52	33	76	29	32	2	37	65	67	69	70	75
YALI1_A12772g	591	158	161	94	67	64	45	80	70	124	102	79	20	59	144	124	232	125	225
YALI1_A12812r	82	0	2	0	0	0	0	0	0	1	0	0	0	0	0	0	4	0	0
YALI1_A12822g	309	6	4	0	4	12	5	2	3	12	2	0	0	0	2	0	0	0	2
YALI1_A12836r	71	0	0	0	0	0	0	0	0	0	0	0	0	0	0	0	0	0	0
YALI1_A12837r	122	0	0	0	0	0	0	0	0	0	0	0	0	0	0	0	0	3	0
YALI1_A12846r	72	0	0	0	0	0	0	0	0	0	0	0	0	0	0	0	2	0	0
YALI1_A12852g	1167	2	2	6	6	2	0	0	2	2	0	0	0	2	0	4	1	0	2
YALI1_A12868g	264	0	0	0	0	0	0	0	0	0	0	0	0	0	0	0	0	0	0
YALI1_A12874r	88	0	0	0	0	0	0	0	0	0	0	0	0	0	0	0	0	0	0
YALI1_A12929g	1314	0	0	0	2	2	0	0	0	0	34	45	14	410	473	821	30	171	51
YALI1_A12944r	72	0	0	0	0	0	0	0	0	0	0	0	0	0	0	0	0	2	0
YALI1_A12989g	963	645	1010	528	259	306	289	489	389	758	286	346	59	489	775	571	1163	662	1128
YALI1_A12995r	71	0	0	0	0	0	0	0	0	0	0	0	0	0	0	0	0	0	0
YALI1_A12996r	119	0	0	0	0	2	0	0	0	2	0	0	0	0	0	0	4	0	0
YALI1_A13007g	696	43	4	20	10	6	15	27	15	38	0	5	0	4	3	4	8	4	2
YALI1_A13019g	1140	117	14	55	62	42	44	40	49	123	13	4	0	4	6	8	10	17	16
YALI1_A13041g	486	4235	5531	2832	1796	1934	1514	13815	3066	4024	1095	1306	138	1723	2563	1079	4343	2933	3796
YALI1_A13046g	2448	5110	5748	3354	2274	2253	1959	12052	3647	5059	1010	1426	221	1805	2621	1613	4060	2972	3734
YALI1_A13095g	2100	775	773	398	386	332	279	692	589	945	191	212	18	244	346	337	617	494	902
YALI1_A13100g	2553	14107	13121	7516	7151	6919	5522	13593	7968	19034	4128	5236	550	6021	10682	7209	17703	11246	15906
YALI1_A13128r	74	0	2	0	0	0	0	0	0	0	0	0	0	0	0	0	0	0	0
YALI1_A13131g	240	192	139	86	68	49	70	25	111	210	53	90	7	63	85	124	193	169	242
YALI1_A13148g	294	227	209	111	83	88	71	36	123	267	101	118	9	87	115	123	203	197	257
YALI1_A13171r	89	4	4	2	6	2	4	8	0	4	2	0	0	1	2	0	9	8	11
YALI1_A13200g	1530	247	142	119	116	97	86	115	125	310	109	138	19	143	209	184	315	259	296
YALI1_A13224g	1182	202	69	73	57	57	68	110	79	135	106	108	11	89	154	130	273	163	242
YALI1_A13227g	387	91	38	28	28	27	39	36	30	63	63	66	7	29	52	70	89	79	137
YALI1_A13236g	231	68	33	20	14	29	10	28	27	41	28	15	2	11	17	21	55	21	34
YALI1_A13287g	378	8	2	0	0	4	3	1	0	12	0	4	0	0	0	2	2	0	4
YALI1_A13330g	249	608	451	357	114	141	144	346	261	367	65	61	2	60	41	40	137	101	144
YALI1_A13334g	558	749	567	389	183	183	202	470	276	498	69	91	4	57	99	82	225	127	249
YALI1_A13349g	1644	5258	3853	2454	1971	1900	1733	1269	2285	6699	1578	1823	177	1752	2979	2396	5429	3487	5332
YALI1_A13383g	1497	8583	9128	4964	5323	5050	4120	11530	4766	13737	2391	3185	423	3774	5645	4660	12161	7274	11527
YALI1_A13392g	216	485	460	271	248	241	221	314	267	579	157	140	9	139	184	245	449	275	456
YALI1_A13397g	228	432	321	194	160	149	145	235	184	447	107	97	8	120	157	143	306	223	325
YALI1_A13412g	1512	8544	7380	4107	3781	3571	3210	4959	4264	10734	2501	2798	347	2872	5321	4196	8603	6341	8453
YALI1_A13432r	91	0	0	0	0	0	4	0	0	1	0	0	0	0	0	0	1	0	4
YALI1_A13454g	1695	24353	32492	18860	12717	13289	9511	56600	17723	27004	5751	7804	1393	11913	17737	9326	26245	18078	22872
YALI1_A13490r	93	0	0	0	2	2	0	0	0	6	0	2	0	2	0	0	6	0	0
YALI1_A13497r	119	0	0	0	0	1	0	2	0	2	0	0	0	0	1	0	0	2	0
YALI1_A13498r	88	0	0	0	0	0	0	0	0	0	0	0	0	0	0	0	0	0	0
YALI1_A13508g	516	6	0	4	0	4	8	6	2	12	40	49	2	14	7	78	22	113	9
YALI1_A13555g	3744	13648	10313	6741	5860	5584	4899	7763	7666	15390	2847	3232	336	3661	6098	5168	10166	7104	9851
YALI1_A13566g	1020	7104	9305	4923	3629	3916	2777	15265	5392	7576	1824	2604	313	3277	5280	2512	8963	5855	7556
YALI1_A13591g	258	1178	1165	601	247	351	262	531	447	918	500	448	89	446	601	497	1221	742	1340
YALI1_A13593g	222	421	413	224	122	131	97	274	193	388	172	187	24	208	272	284	455	321	606
YALI1_A13596g	1908	2341	2062	1053	643	702	553	1193	953	2203	507	776	110	784	1307	1219	2290	1754	2701
YALI1_A13637g	243	380	282	183	112	116	117	160	127	507	139	152	16	168	372	236	329	390	381
YALI1_A13649g	1734	39416	43103	26601	17929	15307	13722	27143	19635	46571	8766	11273	1279	14825	24823	16987	31228	27617	32572
YALI1_A13682g	264	13	3	0	1	1	0	3	2	7	3	1	2	1	2	6	12	1	4
YALI1_A13688r	86	0	0	0	0	0	0	1	0	0	1	0	0	0	0	0	1	0	0
YALI1_A13689r	80	2	0	2	2	0	0	3	0	1	1	0	0	0	0	0	0	0	0
YALI1_A13693r	70	33	29	18	16	15	14	22	16	30	12	16	0	5	30	14	42	46	20
YALI1_A13713g	1488	1842	1607	1016	846	802	722	1337	1097	2450	630	607	87	725	1103	895	1863	1262	1791
YALI1_A13737g	2103	564	1134	468	242	292	262	357	371	679	291	379	36	474	736	652	1246	795	1339
YALI1_A13749g	492	150	217	141	56	75	61	112	117	171	54	75	11	125	180	136	225	191	268
YALI1_A13775g	552	0	0	0	0	0	0	0	0	0	0	0	0	0	0	0	0	0	2
YALI1_A13785g	294	0	0	2	0	0	0	0	0	0	0	0	0	0	0	0	0	0	0
YALI1_A13831r	89	0	0	0	0	0	0	0	0	0	0	0	0	0	0	0	0	0	0
YALI1_A13837r	83	0	2	1	0	0	0	0	0	2	0	0	0	0	0	0	2	0	0
YALI1_A13841r	87	10	10	3	0	2	4	4	10	16	4	3	0	5	10	0	26	12	19
YALI1_A13845g	273	0	0	0	0	0	0	0	0	0	0	0	0	0	0	0	0	0	0
YALI1_A13862r	91	0	2	0	0	0	0	0	0	0	0	0	0	0	0	0	0	0	0
YALI1_A13877g	576	4	0	0	0	2	6	0	0	2	0	0	0	0	0	0	0	0	0
YALI1_A13884r	79	0	0	0	0	0	0	0	0	0	0	0	0	0	0	0	0	0	0
YALI1_A13885r	88	0	0	0	0	0	0	0	0	0	0	0	0	0	0	0	0	0	0
YALI1_A13888r	70	0	0	0	0	0	0	0	0	0	0	0	0	0	1	0	0	0	0
YALI1_A13903g	561	364	281	194	114	108	108	107	188	295	10	21	4	16	18	11	36	21	35
YALI1_A13923r	85	0	0	0	0	0	0	0	2	0	2	0	0	0	0	0	0	0	0
YALI1_A13962g	792	45	12	13	12	15	6	14	15	25	0	6	0	2	0	2	8	4	6
YALI1_A13973r	72	0	0	0	0	0	0	0	0	0	0	0	0	0	0	0	0	0	0
YALI1_A13982r	91	160	146	74	52	48	46	73	104	172	46	40	3	47	91	48	145	72	125
YALI1_A13994g	711	1427	1279	719	654	591	531	975	819	1814	535	549	61	553	980	689	1665	1167	1640
YALI1_A13996r	96	0	0	0	0	0	0	0	0	0	0	0	0	0	0	0	0	0	0
YALI1_A14020g	228	301	249	140	123	149	93	246	137	216	73	76	12	93	135	140	234	208	255
YALI1_A14024g	1530	1595	1675	845	715	773	604	1244	990	2080	635	787	60	776	1404	1046	2299	1436	2112
YALI1_A14079g	1653	64	31	17	29	4	22	8	10	101	32	21	4	20	34	60	130	72	111
YALI1_A14099g	939	3179	2090	1465	1216	1334	1149	267	1539	4441	1079	1317	149	1634	2301	2097	3612	2752	4440
YALI1_A14109g	354	1701	1163	735	739	735	635	151	785	2249	790	885	95	965	1435	1226	2587	1660	2949
YALI1_A14118r	87	0	2	3	1	2	0	3	2	3	3	0	0	3	5	2	6	1	7
YALI1_A14127g	324	117	87	69	55	49	38	66	83	149	46	54	13	51	82	48	122	55	136
YALI1_A14131g	264	187	132	124	71	47	57	75	110	201	64	82	2	52	59	57	173	120	188
YALI1_A14141g	495	276	177	145	99	127	126	158	142	292	91	107	15	113	162	135	240	131	253
YALI1_A14150g	222	188	87	82	68	54	76	64	85	185	47	39	5	73	107	90	148	124	156
YALI1_A14162g	1053	308	153	168	123	136	162	107	168	314	90	90	6	121	179	158	316	182	335
YALI1_A14171r	72	0	0	0	0	0	2	0	0	0	0	0	0	0	0	0	0	0	0
YALI1_A14189g	579	994	1140	602	600	509	515	631	731	1517	320	452	36	473	700	534	1459	828	1321
YALI1_A14199g	1035	3132	2766	1838	1478	1487	1264	2016	1907	3691	801	968	119	1063	1757	1259	2883	1990	2639
YALI1_A14215r	88	0	2	2	0	2	0	0	2	5	0	0	0	0	0	0	0	0	0
YALI1_A14228g	858	6614	4524	3198	2758	2580	2316	1269	3137	8596	1628	2014	215	2316	3457	2946	6226	3878	5838
YALI1_A14237g	516	3	10	4	8	0	2	7	2	10	0	0	0	4	2	2	8	12	12
YALI1_A14259g	1059	3271	3198	1747	1631	1818	1490	1079	2229	5465	811	998	105	1331	1705	1714	3823	2112	3796
YALI1_A14274g	312	363	327	110	234	191	156	146	255	470	133	107	12	111	151	126	401	269	394
YALI1_A14287g	522	7909	8454	5127	4641	3740	3457	2608	4817	11745	3261	4033	401	3556	5726	4221	11794	7473	11081
YALI1_A14292g	282	2029	2078	1244	1486	1346	1071	778	1458	4233	1091	1406	102	1261	2651	1541	3811	2356	3506
YALI1_A14305g	1329	1201	1073	665	553	524	384	61	534	1679	427	440	49	446	882	640	1583	974	1634
YALI1_A14345g	1944	16777	17025	9891	9322	9013	7115	13479	9611	23822	6904	8340	1137	11557	17923	12960	30632	18807	27155
YALI1_A14368g	699	1302	909	608	614	582	430	580	652	1582	650	698	104	712	1095	909	2279	1389	2202
YALI1_A14377g	477	725	567	364	196	206	146	275	347	726	256	232	29	188	309	249	483	308	544
YALI1_A14390g	1908	8551	7211	4953	4376	4329	3343	7327	4880	10656	2297	2749	304	3691	5317	3952	9470	6444	9117
YALI1_A14414g	408	482	517	298	210	201	166	65	218	818	134	104	22	167	243	213	511	273	438
YALI1_A14430g	372	596	530	398	201	234	177	81	235	690	133	110	19	224	192	243	554	356	549
YALI1_A14458g	312	169	132	86	49	62	50	25	76	185	14	16	6	17	18	29	70	36	44
YALI1_A14483g	270	4	0	0	0	0	0	0	0	2	3	0	0	2	2	0	2	0	0
YALI1_A14510g	462	989	957	517	309	333	288	826	513	885	173	223	28	249	329	402	612	409	712
YALI1_A14513g	3618	8966	7090	4493	3968	3967	3350	5658	4639	10849	2568	2926	384	3382	5815	4998	9279	6573	9389
YALI1_A14568g	1698	7195	4767	3158	2821	2693	2402	1747	2850	7946	1636	1843	230	1832	2867	2888	5397	3644	5036
YALI1_A14586r	74	0	1	0	0	0	0	0	0	0	0	0	0	0	0	0	0	0	0
YALI1_A14596g	678	10	7	3	0	8	2	2	2	13	4	1	0	0	2	0	4	0	6
YALI1_A14658g	5199	2739	2114	1581	1374	1368	1163	1441	1626	3859	820	1006	149	1353	2114	1952	3203	2410	3483
YALI1_A14670g	1365	2193	1750	1178	911	975	848	925	1128	2636	582	676	71	863	1449	1276	2219	1755	2402
YALI1_A14691g	234	651	555	310	275	247	176	253	348	843	213	226	32	208	441	368	661	437	669
YALI1_A14703g	684	2311	2013	1244	1055	1217	833	523	1230	2880	853	878	110	1066	1456	1151	2982	1815	2564
YALI1_A14721g	498	12596	11587	7526	6686	6561	5261	10681	8501	14579	3946	5893	815	8768	10975	9431	23257	12416	20030
YALI1_A14736g	1425	86783	73259	44179	42882	40169	32129	103238	48700	99359	21835	29677	4338	39631	55140	45190	99060	56831	89852
YALI1_A14772g	540	17	16	2	10	6	3	12	2	8	4	4	0	0	6	10	18	5	6
YALI1_A14783g	3663	16829	13798	9337	5437	5676	5135	5214	6991	16587	3633	3968	428	4686	6331	6144	10842	8261	12567
YALI1_A14826g	3243	818	575	506	416	488	411	272	661	1274	113	108	14	153	222	198	422	290	478
YALI1_A14882g	1926	130	91	65	57	37	36	25	51	145	3	22	6	23	20	35	61	43	68
YALI1_A14905r	119	0	0	0	0	0	0	0	0	0	0	0	0	0	0	0	0	0	0
YALI1_A14922g	1815	56	60	39	44	60	37	41	44	114	6	23	0	25	30	22	67	35	46
YALI1_A14989g	576	9	13	1	11	10	0	7	6	8	2	1	0	0	4	6	0	0	0
YALI1_A14999g	309	26	17	10	14	11	14	2	17	9	0	0	0	0	0	0	0	0	0
YALI1_A15017t	1188	868	2409	1158	391	343	314	753	542	966	376	365	52	479	715	410	1232	709	1046
YALI1_A15040t	1227	329	808	494	227	228	182	476	251	483	80	148	29	265	431	305	497	426	505
YALI1_A15045g	690	234	655	320	123	140	115	223	216	318	113	136	27	182	220	153	300	183	298
YALI1_A15053g	996	566	1147	518	239	276	184	356	329	646	250	273	27	312	414	390	833	496	782
YALI1_A15073g	816	1824	1467	915	694	874	667	665	1059	2312	528	592	47	570	1020	698	1555	1196	1566
YALI1_A15079g	666	2291	1837	1165	1117	1118	872	678	1193	3348	604	628	65	632	991	707	2235	1122	1945
YALI1_A15105g	1764	2241	1234	793	1189	888	1168	536	776	4157	2694	3764	358	2975	5375	3700	10433	6441	9196
YALI1_A15132g	1734	1048	791	561	848	880	770	721	889	1871	677	805	106	710	1276	1187	2189	1483	2147
YALI1_A15172g	402	457	416	226	200	252	156	258	319	586	143	203	13	196	258	261	529	367	561
YALI1_A15178g	219	97	165	108	94	99	59	130	93	240	67	65	8	109	103	116	288	197	358
YALI1_A15185g	462	453	354	217	213	199	119	191	229	562	128	154	15	156	170	183	395	238	392
YALI1_A15192g	396	422	298	177	160	161	139	117	163	488	122	126	23	120	206	177	369	180	363
YALI1_A15227g	1047	5361	4213	2418	2477	2203	1873	535	2040	7450	1632	1717	214	1515	2440	2849	5548	3122	5545
YALI1_A15274g	1401	6	0	2	0	0	0	0	0	4	0	0	0	0	0	0	2	0	0
YALI1_A15297r	89	0	0	0	0	0	0	0	0	0	0	0	0	0	0	0	0	0	0
YALI1_A15302r	87	0	0	0	0	0	0	0	0	0	0	0	0	0	0	0	0	0	0
YALI1_A15303r	86	0	0	0	0	0	0	0	0	0	0	0	0	0	0	0	0	0	0
YALI1_A15311g	501	0	0	0	0	2	0	0	0	0	0	2	0	0	0	0	0	0	0
YALI1_A15349g	1887	3813	5509	3718	2521	2834	2197	3306	3391	5812	1586	1929	318	3658	4106	3941	6932	5223	7709
YALI1_A15366g	480	35	105	36	20	19	25	30	37	53	10	10	0	24	21	21	59	31	50
YALI1_A15373g	291	117	196	90	54	29	36	51	72	152	95	107	8	85	98	78	286	135	186
YALI1_A15382r	89	2	2	2	0	0	2	2	2	3	1	4	0	0	2	2	9	2	6
YALI1_A15391r	72	0	0	0	0	0	0	0	0	0	0	0	0	0	0	0	0	0	0
YALI1_A15397r	121	0	0	0	0	0	0	0	0	0	0	0	0	0	0	0	0	0	0
YALI1_A15414g	1884	1797	1686	1030	814	896	763	1377	1146	2326	449	616	86	728	1260	920	1727	1260	1939
YALI1_A15437g	267	253	339	175	132	161	89	236	172	387	116	146	18	125	251	141	435	231	377
YALI1_A15461g	486	0	1	0	2	0	0	0	6	0	2	6	0	0	0	0	6	2	0
YALI1_A15482g	534	1566	1593	992	725	652	523	1863	942	1801	247	300	45	307	584	299	1077	749	792
YALI1_A15497g	678	2755	2502	1391	1442	1344	1128	358	1479	4434	1307	1564	167	1509	2590	1756	4849	2888	4355
YALI1_A15507g	255	2229	1357	826	834	870	690	94	1149	2897	654	509	32	496	875	773	1644	1125	1699
YALI1_A15515g	540	888	944	501	322	351	302	337	508	1053	314	339	22	347	487	435	888	718	1044
YALI1_A15523g	336	520	652	261	186	226	206	169	259	719	224	254	25	176	335	249	549	441	482
YALI1_A15528g	531	579	401	255	236	243	191	242	353	762	109	151	20	139	225	145	449	228	424
YALI1_A15544g	1581	690	481	298	321	272	278	237	337	854	143	235	16	107	250	150	388	232	375
YALI1_A15564r	100	0	2	0	2	0	0	0	0	0	0	0	0	0	0	0	2	2	0
YALI1_A15584g	1848	2079	1908	1183	1125	983	849	1373	1213	2988	823	891	120	988	1754	1368	2772	1783	2760
YALI1_A15624g	1920	22	16	15	6	22	13	344	18	37	7	12	0	8	14	8	24	8	10
YALI1_A15633g	486	0	0	2	0	0	0	0	0	0	0	0	0	0	0	0	2	0	0
YALI1_A15666g	498	87	13	19	53	37	31	25	41	75	4	16	0	19	26	13	53	31	45
YALI1_A15675g	453	38	22	27	17	13	26	11	30	56	8	16	0	6	17	18	31	12	27
YALI1_A15682r	82	0	0	0	0	2	0	0	0	2	0	0	0	0	0	0	4	0	4
YALI1_A15720g	2946	10294	10824	6378	5139	5433	4328	9682	6068	14746	3485	4047	560	5203	8208	5719	15176	8799	13806
YALI1_A15722g	1536	7352	7645	3956	2554	3203	2325	12135	3809	6671	1799	1828	242	2215	2928	1889	5546	3549	5429
YALI1_A15740r	72	0	0	0	0	0	0	0	0	0	0	0	0	0	0	0	0	0	0
YALI1_A15766g	372	131	72	35	17	23	8	21	46	92	14	5	0	7	3	11	36	16	21
YALI1_A15784g	1392	3356	2630	1776	1457	1378	1386	1567	2044	3852	627	743	108	860	1433	1135	2434	1594	2360
YALI1_A15813g	696	13	12	8	5	7	14	5	12	14	3	0	2	5	14	22	10	2	6
YALI1_A15835r	92	0	3	0	0	0	1	0	1	0	0	0	0	0	0	0	0	0	0
YALI1_A15843r	72	0	3	0	0	0	2	0	0	0	0	0	0	0	0	0	0	0	0
YALI1_A15846g	699	466	601	368	254	283	183	546	353	582	181	204	15	237	359	258	667	413	631
YALI1_A15863g	651	208	226	141	86	98	89	3650	238	218	30	39	7	42	61	65	193	76	192
YALI1_A15875r	74	0	0	0	0	0	0	0	0	0	0	0	0	0	0	0	0	0	0
YALI1_A15879g	2568	9045	9502	5809	4911	5213	3885	16193	6147	11795	2101	3024	333	3849	6275	4238	10127	7119	9082
YALI1_A15925g	1017	12798	11770	7297	7015	6505	5092	11162	7080	16962	3670	5105	697	5856	9396	6162	18201	9832	14880
YALI1_A15953r	74	6	2	0	1	2	3	4	6	2	2	0	0	0	3	3	2	0	4
YALI1_A15961g	429	8	0	4	7	6	2	6	4	29	8	10	0	2	2	2	6	2	6
YALI1_A15978g	900	1049	1285	828	387	479	330	626	640	1241	413	518	79	562	884	535	1470	903	1588
YALI1_A16004g	1461	3311	2463	1744	1655	1584	1374	1270	1630	4990	1429	1770	226	1739	2843	2389	5291	3577	5222
YALI1_A16020g	201	210	184	107	82	72	65	42	113	288	75	94	10	54	133	92	241	148	216
YALI1_A16028g	576	247	257	163	94	117	107	54	152	423	122	126	7	122	183	186	371	188	347
YALI1_A16031g	228	76	43	33	38	19	30	15	64	86	40	49	3	32	73	37	100	51	91
YALI1_A16050r	85	0	0	0	0	0	0	0	0	0	0	0	0	0	0	0	0	0	0
YALI1_A16068r	119	51	28	22	27	38	29	19	24	55	23	35	2	17	55	55	52	45	71
YALI1_A16075g	411	95	64	53	45	81	44	40	44	155	62	68	10	72	117	122	188	106	147
YALI1_A16095g	927	5866	5641	3665	2882	2864	2289	2643	3566	7980	2075	2483	254	2901	4684	3119	7912	4785	6900
YALI1_A16121g	1095	4444	5803	3315	2527	2537	2109	5270	3060	5688	2432	3345	597	4915	6525	5244	11542	6831	9816
YALI1_A16136g	294	441	572	286	154	175	120	410	232	517	101	112	15	90	147	90	276	176	309
YALI1_A16145g	252	97	148	55	48	35	36	45	61	90	66	69	8	81	104	64	265	106	223
YALI1_A16178g	3090	700	1463	743	352	305	300	518	452	857	360	473	72	585	816	742	1309	885	1367
YALI1_A16215g	2466	17268	12927	8377	8050	7598	6981	5678	10143	20328	2887	3717	391	4256	6688	5447	12109	7447	11384
YALI1_A16230g	288	43	34	34	8	4	10	14	23	38	2	0	0	1	2	2	4	0	4
YALI1_A16264g	519	22	8	6	12	9	10	6	23	37	12	20	0	21	17	19	23	35	24
YALI1_A16274r	88	17	6	1	2	7	6	2	17	20	20	23	2	18	29	27	76	40	79
YALI1_A16292g	1050	35249	24197	14108	15549	11970	12189	7779	10781	50811	9970	14099	1264	15115	25467	23985	52325	31229	45496
YALI1_A16303g	252	19	18	7	9	1	8	3	1	32	8	9	0	14	16	17	22	19	31
YALI1_A16314g	528	8	8	7	2	2	2	0	5	18	1	0	0	2	2	4	4	0	6
YALI1_A16335g	624	5	7	1	5	7	2	9	0	24	3	8	1	4	10	3	14	2	10
YALI1_A16392g	3444	50	26	22	20	17	30	24	24	55	42	26	8	46	73	35	122	48	106
YALI1_A16422g	2016	87	32	50	22	29	48	4	12	146	2	10	0	2	10	8	19	10	17
YALI1_A16461g	381	1468	1263	878	622	618	531	1244	1061	1819	318	322	38	352	660	350	1130	667	1010
YALI1_A16466g	1038	3252	3652	1870	1252	1311	1083	3684	1849	3708	856	1020	125	1162	1719	1282	2839	2049	2802
YALI1_A16485g	885	91	81	33	53	26	37	40	25	109	28	40	8	23	25	38	113	58	73
YALI1_A16496g	258	434	459	297	317	266	221	411	305	840	176	188	16	234	420	263	761	506	613
YALI1_A16501g	261	889	858	459	436	503	405	739	586	1377	308	322	28	393	513	476	1057	567	991
YALI1_A16509g	4899	7416	6821	4218	3434	3565	2937	5752	4300	9250	1622	1868	246	2352	3755	3010	6297	4322	6339
YALI1_A16583r	121	0	0	0	0	0	0	0	0	0	0	0	0	0	2	0	1	0	0
YALI1_A16593g	516	4	2	2	2	0	0	0	2	0	5	0	0	0	0	0	2	0	4
YALI1_A16618g	1806	25	10	9	8	4	6	18	10	16	0	0	0	0	0	0	2	4	2
YALI1_A16628r	82	1	0	0	0	0	0	0	0	2	0	0	0	0	0	2	4	0	0
YALI1_A16633r	74	0	0	0	0	0	0	0	0	0	0	0	0	0	0	0	0	0	2
YALI1_A16642g	1119	2952	2976	1869	1620	1470	1054	1910	1921	4000	951	1227	138	1398	2150	1366	3841	2517	3378
YALI1_A16681g	2007	3511	2508	1656	1519	1544	1249	4556	1876	3640	252	383	46	410	723	505	791	668	677
YALI1_A16712g	933	18	9	4	4	12	2	2	5	9	2	0	0	0	0	0	0	1	0
YALI1_A16745g	435	8726	9936	4715	3752	3574	3029	7896	4891	9923	2528	2814	312	3042	4759	2600	9607	5317	8624
YALI1_A16770g	1899	8934	8035	5228	4944	4478	3949	3012	5081	13599	3481	4363	461	4691	7899	5700	15316	9809	12932
YALI1_A16787g	1374	1811	1372	947	837	764	668	892	1016	2161	379	452	72	442	825	664	1409	882	1319
YALI1_A16808g	315	47	75	28	30	37	28	28	16	41	18	30	2	16	44	23	63	31	55
YALI1_A16809g	273	46	64	21	26	18	14	40	13	50	16	24	9	12	15	34	77	22	77
YALI1_A16826g	411	197	232	95	146	105	80	146	130	268	76	76	8	82	129	102	266	181	205
YALI1_A16832g	264	167	141	67	97	79	70	139	123	229	44	47	7	54	75	61	180	157	180
YALI1_A16843g	540	168	69	73	66	58	50	78	99	174	113	108	8	118	186	203	280	153	198
YALI1_A16863g	501	51	13	40	11	6	1	13	21	34	17	34	1	43	55	55	86	63	31
YALI1_A16891g	1395	244	103	190	651	641	443	761	468	595	191	299	36	546	922	537	710	508	512
YALI1_A16918g	222	60	66	32	36	29	44	15	40	51	132	129	11	100	294	209	381	308	417
YALI1_A16938g	486	21	19	16	6	7	4	7	26	27	25	27	2	43	32	35	70	54	91
YALI1_A16944g	324	225	256	117	91	89	72	92	141	238	100	64	4	49	100	73	172	106	249
YALI1_A16950g	285	376	446	215	226	189	146	198	255	496	246	250	46	233	231	229	698	411	732
YALI1_A16952g	342	66	69	38	19	38	30	37	34	77	30	25	3	22	51	24	60	40	96
YALI1_A16988g	960	1394	1578	936	721	688	606	1560	1008	1622	517	598	79	792	1169	673	2032	1407	1879
YALI1_A16991g	570	839	727	530	319	355	264	714	403	863	350	324	24	311	585	344	936	525	799
YALI1_A17008r	91	0	1	0	0	0	0	0	0	0	0	0	0	0	0	0	0	0	0
YALI1_A17035r	77	0	0	0	0	0	0	0	0	0	0	0	0	0	0	0	0	0	0
YALI1_A17037r	108	0	0	0	0	0	0	0	0	0	0	0	0	0	0	0	1	0	0
YALI1_A17085g	4287	85434	43574	36190	42150	35528	35206	42847	46685	96813	8959	9075	762	10553	22728	21484	26549	24968	28865
YALI1_A17103g	645	289	375	195	174	128	133	244	180	368	151	158	14	136	328	179	523	312	465
YALI1_A17118g	525	449	818	315	255	251	229	633	322	675	305	367	40	390	704	524	1119	764	985
YALI1_A17123g	345	224	421	228	122	127	111	352	188	345	127	190	32	245	321	194	611	468	563
YALI1_A17126r	81	0	0	0	0	0	0	0	2	0	0	0	0	0	0	0	2	0	0
YALI1_A17177g	4932	44861	34312	24661	22801	21807	19512	29458	27683	62728	12357	16131	1977	19606	31586	25257	51772	33900	49812
YALI1_A17234g	2079	531	357	244	295	350	284	319	351	638	121	84	12	106	196	166	334	170	247
YALI1_A17239g	477	74	68	26	43	27	24	43	56	81	19	25	6	16	41	14	74	35	57
YALI1_A17289g	4215	3290	2121	1396	1371	1320	1245	1417	2086	4092	710	747	70	750	1405	1380	1908	1717	2273
YALI1_A17320g	585	102	218	142	56	70	44	135	72	116	55	76	13	70	96	68	174	125	198
YALI1_A17328g	1527	473	1214	652	211	241	233	511	326	543	178	331	52	439	623	486	854	580	861
YALI1_A17348g	912	258	652	319	128	158	87	209	171	323	138	202	35	227	389	305	578	321	554
YALI1_A17383g	444	53	57	13	27	50	13	63	26	60	21	37	6	4	12	13	54	35	44
YALI1_A17401g	597	45	21	36	12	16	18	16	23	50	0	0	0	0	4	0	15	4	4
YALI1_A17419g	1035	2713	1737	1318	842	731	615	4135	1375	1790	362	315	44	386	751	578	945	712	1091
YALI1_A17433g	1056	2392	2740	1596	1021	1062	854	4754	1695	1973	489	665	98	921	1121	752	2252	1477	2082
YALI1_A17450g	1158	2391	2592	1497	1087	1146	847	3225	1652	2730	727	880	127	1006	1681	864	2875	2011	2538
YALI1_A17470g	573	1256	1666	1107	667	893	714	1470	963	1993	689	830	113	1003	1508	919	2603	1535	2203
YALI1_A17486g	1500	1975	2076	1105	783	920	737	202	1197	2732	778	916	119	945	1556	1271	2476	1633	2535
YALI1_A17511g	792	1385	1242	864	608	589	476	2404	802	1472	747	890	113	1052	1581	946	3126	1907	2677
YALI1_A17512r	72	3	0	0	0	0	0	0	0	0	0	0	0	0	4	0	0	0	2
YALI1_A17515g	1623	4493	3583	2417	2232	2277	1820	3399	2719	5783	1140	1463	212	1793	2439	2263	4402	2672	4035
YALI1_A17546g	705	66	102	35	47	45	25	30	28	122	80	76	8	98	131	99	238	142	182
YALI1_A17551g	357	39	50	27	9	22	25	21	12	41	37	34	6	46	46	24	98	58	75
YALI1_A17570g	1074	38470	31914	19372	21436	19183	15165	40897	21527	43844	9193	13291	2004	17009	22164	19071	46753	27696	42719
YALI1_A17583g	1791	7444	8042	4199	2234	2630	2016	4016	3123	7104	2988	2739	374	3116	3778	3894	7982	5046	8209
YALI1_A17622g	1884	2665	2728	1714	1637	1662	1377	2089	1749	4048	1063	1403	193	1833	2843	2108	4862	3405	4569
YALI1_A17640g	1692	21	12	12	6	11	20	24	8	33	10	2	0	0	7	6	14	4	12
YALI1_A17651g	636	6	25	5	10	4	8	10	6	10	6	4	0	4	4	2	10	4	16
YALI1_A17671g	3708	4055	4652	3000	1861	1827	1404	4048	2620	5156	1162	1740	210	2173	3345	2315	5029	3354	4676
YALI1_A17720g	1014	1823	2485	1586	1024	985	882	1623	1472	2667	638	783	120	953	1387	990	2431	1446	1980
YALI1_A17724g	216	129	99	75	51	25	34	75	74	111	84	99	2	86	196	90	238	220	291
YALI1_A17732r	93	1	2	0	1	0	0	0	1	3	2	1	0	1	0	2	2	0	3
YALI1_A17749g	1548	214	167	109	98	132	99	78	96	231	321	496	41	342	419	208	1128	404	716
YALI1_A17766r	72	0	0	0	0	0	0	2	2	0	0	0	0	0	0	0	0	2	0
YALI1_A17781r	82	0	0	0	0	0	0	2	0	2	0	0	0	0	2	0	0	0	0
YALI1_A17788r	74	4	0	0	0	0	0	0	0	0	0	0	0	0	0	0	0	0	0
YALI1_A17824g	2958	1203	793	645	533	521	469	613	707	1354	430	524	58	547	878	686	1456	1010	1362
YALI1_A17876t	2991	20	17	2	3	6	11	0	10	9	4	5	0	4	7	0	19	11	17
YALI1_A17927g	2637	4573	4264	2530	2035	2185	1834	3016	2640	6387	1741	2212	261	2719	4050	3227	7191	4937	7193
YALI1_A17957g	606	39941	26661	17763	14903	14602	12808	25154	17893	40015	6504	7872	967	9351	13759	11384	30598	18393	27409
YALI1_A17983g	285	3	4	0	4	6	0	0	3	12	2	1	0	0	0	1	2	0	5
YALI1_A18010g	1176	6045	6630	3588	2546	2818	1903	6089	3318	6849	1881	2143	314	2572	3638	2787	6697	3717	5762
YALI1_A18036g	2094	8842	8075	5056	3272	3337	2868	8777	4008	8355	1652	2075	304	2915	3786	3568	7552	4993	7423
YALI1_A18062g	1602	538	382	248	270	213	220	102	256	980	849	790	109	770	1345	1325	2476	1475	2862
YALI1_A18076g	567	14	16	0	4	12	13	12	7	19	21	19	2	14	30	18	83	56	80
YALI1_A18133g	1398	18231	18075	9923	9400	8932	7399	14497	9059	23846	9374	13591	1986	17153	22376	18965	50528	26164	42505
YALI1_A18166g	1851	14863	20107	10562	7793	8072	6020	50688	12709	13844	3328	4208	696	6711	10144	5136	14148	11509	13404
YALI1_A18188g	279	9937	8948	4794	3671	3791	2901	7501	4950	10785	3014	3827	348	3237	5888	3077	13587	7691	11503
YALI1_A18196g	252	978	726	439	385	367	288	537	393	1002	264	352	32	221	395	296	751	461	751
YALI1_A18204g	342	138	105	53	59	92	41	70	72	148	21	34	10	12	37	52	71	50	101
YALI1_A18219g	342	19	22	12	4	13	11	2	7	25	14	24	3	10	34	25	63	17	51
YALI1_A18225r	118	0	0	0	0	0	0	0	0	0	0	0	0	0	0	0	2	0	0
YALI1_A18273g	2145	17542	17856	10533	7870	8101	6261	15542	10129	19560	4733	6151	948	6860	10765	6686	19008	11889	16067
YALI1_A18286g	1671	5925	6132	3404	2946	3161	2470	8926	3745	7538	1487	1831	286	2303	3682	2451	5821	3770	5383
YALI1_A18315g	549	1662	1754	1002	687	709	628	915	933	1782	746	835	112	902	1219	1023	2254	1352	2209
YALI1_A18344g	1524	15728	17389	10195	10129	9106	7639	30875	10707	23041	5603	7515	1022	10543	16089	12154	25865	17143	23378
YALI1_A18374r	126	0	0	0	0	0	0	0	0	0	0	0	0	0	0	0	0	0	0
YALI1_A18375r	76	0	0	0	0	0	0	0	0	0	0	0	0	0	0	0	0	0	0
YALI1_A18377r	125	0	0	0	0	0	0	0	0	0	0	0	0	0	0	0	0	0	0
YALI1_A18378r	82	0	0	0	0	0	0	0	0	0	0	0	0	0	0	0	0	0	0
YALI1_A18414g	2331	6695	8061	3458	2254	2550	2018	3325	2679	7349	2978	3453	496	4108	5120	4503	10697	5903	10639
YALI1_A18426g	303	2542	2597	1484	1328	1393	1069	1893	1223	3587	879	920	71	1135	2038	1786	3158	1791	2666
YALI1_A18439g	1158	3205	2877	2178	1607	1569	1509	2397	2005	4669	986	1025	137	1512	2673	1977	3778	2396	3182
YALI1_A18443g	420	168	165	72	90	75	96	73	93	291	22	62	0	59	122	69	141	122	169
YALI1_A18451g	375	1641	1285	788	555	521	581	633	841	1573	160	224	16	228	341	338	560	437	502
YALI1_A18463g	378	1840	1565	1015	573	599	545	808	1097	1912	237	232	18	227	381	326	592	367	675
YALI1_A18466g	255	966	833	541	321	304	256	324	586	830	111	155	8	123	223	227	320	248	283
YALI1_A18470g	429	1771	1560	972	603	540	531	588	978	1816	334	345	30	219	475	399	741	410	689
YALI1_A18489g	483	0	0	0	0	2	2	1	4	4	0	2	0	0	0	0	2	0	0
YALI1_A18514g	1635	5208	6517	3180	2606	2792	2234	11851	4109	5855	2935	3577	393	4751	7484	4564	10877	8217	10128
YALI1_A18557g	813	84575	120121	55481	44339	48288	32876	203998	56490	83610	20025	27485	5498	42925	49014	31067	91655	56310	79416
YALI1_A18590g	516	110	58	56	61	45	44	81	53	138	151	167	9	174	365	291	459	348	456
YALI1_A18605g	201	141	137	97	47	63	34	72	53	177	58	78	5	63	84	68	159	118	103
YALI1_A18622g	864	5968	7011	3280	2242	2414	1945	4200	2803	7320	2272	3076	376	3337	4244	3901	10445	5653	8970
YALI1_A18660g	1035	2048	3482	1677	1292	1253	1022	7299	1810	2573	844	1029	140	1442	1914	1466	3409	2565	3297
YALI1_A18671g	261	996	1485	821	449	485	305	2506	589	1209	579	511	50	465	905	472	1498	979	1134
YALI1_A18675g	213	110	112	54	41	30	27	116	55	102	26	31	5	34	63	55	96	57	98
YALI1_A18692g	465	60	34	39	36	18	36	16	34	63	11	20	0	7	16	18	20	28	21
YALI1_A18719g	255	47	45	37	59	60	29	42	70	99	30	40	6	35	31	36	117	82	114
YALI1_A18728g	231	101	107	40	37	50	49	46	63	129	41	50	15	39	71	63	103	76	108
YALI1_A18732g	345	33	33	28	33	52	17	15	22	57	23	45	8	24	70	56	108	89	101
YALI1_A18752g	2916	3251	3119	1713	1539	1380	1346	1791	1876	3766	962	1155	156	1391	2086	1812	4055	2825	3900
YALI1_A18805g	1158	2697	2622	1584	1223	1354	942	3422	1590	2868	729	898	138	1009	1579	969	2815	1891	2533
YALI1_A18817g	612	950	780	501	430	454	379	652	583	1097	248	288	33	430	599	545	1025	782	1156
YALI1_A18847g	900	7647	7087	4072	3893	3812	3202	3113	4180	11033	2360	2810	369	3198	5303	3672	10189	5912	9313
YALI1_A18897g	1149	1563	1738	951	787	669	557	1142	818	1998	670	757	94	729	1221	1034	2465	1463	2244
YALI1_A18915g	2835	8515	8119	4602	3997	3987	3766	4986	3341	15163	2119	2487	285	2834	3789	4270	8712	5228	9992
YALI1_A19010g	261	105	50	58	25	31	31	14	29	76	8	15	1	0	6	12	20	26	45
YALI1_A19025g	2103	6908	6671	4783	3593	3238	3456	1383	4415	11322	1499	1848	214	2044	3324	2812	5449	4170	5718
YALI1_A19070g	1602	1413	1075	753	693	672	670	538	854	1848	177	287	19	215	331	293	542	472	492
YALI1_A19089g	432	47	91	24	16	44	23	56	44	86	20	32	0	10	32	11	37	30	41
YALI1_A19096g	543	134	188	94	82	71	50	83	48	148	25	23	0	10	31	28	18	35	35
YALI1_A19123g	507	8	10	6	1	2	3	6	2	4	6	10	0	4	4	1	16	6	22
YALI1_A19195g	429	261	252	121	51	82	63	106	95	162	205	186	30	154	213	215	506	328	485
YALI1_A19214g	852	105	106	80	89	74	73	62	104	199	295	367	27	426	604	650	1046	634	685
YALI1_A19220g	579	17	40	22	24	11	22	33	20	62	129	168	9	261	254	395	442	334	396
YALI1_A19249g	345	32	42	27	12	14	14	9	20	27	10	9	4	11	19	16	38	27	24
YALI1_A19398g	999	2654	2132	1190	927	962	761	913	1087	3059	455	549	65	632	765	573	1620	879	1339
YALI1_A19419g	351	11	10	4	2	2	2	2	8	9	4	6	0	15	8	18	11	8	10
YALI1_A19428g	1131	1747	1458	870	837	853	660	1402	1012	2095	513	553	52	736	1170	834	1726	1112	1668
YALI1_A19441g	222	384	453	238	266	190	163	415	185	523	409	488	59	418	718	481	1397	870	1438
YALI1_A19459g	1461	5816	6429	3554	3338	3211	2557	6445	3417	8704	1620	1983	318	2763	3885	3032	7227	5198	7459
YALI1_A19483g	786	5705	4804	2845	2896	2729	2211	3042	3126	8028	1754	2222	198	2149	3708	2620	7569	4201	6649
YALI1_A19515g	1524	7673	5343	3554	3353	3471	3242	1382	4512	10295	1614	1850	203	1974	3194	2857	5487	3859	5504
YALI1_A19526g	387	2287	3011	1796	1344	1201	1129	1926	1762	3472	904	1677	135	1570	2244	1270	5506	2321	4088
YALI1_A19549g	654	2025	2039	1194	969	1005	796	1772	1355	2575	532	566	66	727	1074	796	1679	1281	1779
YALI1_A19563g	2205	1849	1504	954	780	840	822	500	1034	2714	848	808	93	987	1681	1478	2389	1730	2620
YALI1_A19595g	741	1323	1065	695	590	644	455	355	627	1625	411	401	40	366	685	474	1248	756	1103
YALI1_A19650g	1113	2153	1586	985	910	921	764	588	1124	2467	714	741	125	867	1105	1074	2304	1449	2094
YALI1_A19675g	2571	4623	3184	1987	1910	1796	1602	1353	2308	5512	988	1257	150	1434	2241	2167	3793	2512	4071
YALI1_A19725g	2604	9673	6614	5111	4017	3927	3382	3410	4770	11240	2718	3132	424	3233	5596	4486	9132	6067	9478
YALI1_A19731g	1371	4144	3095	2207	2034	1774	1738	635	2228	6075	1406	1616	131	1715	2864	2461	4622	3301	4898
YALI1_A19759g	1482	55035	38618	22528	26346	23024	19246	32809	28460	63670	14336	17208	2059	20333	33321	30222	61467	39581	62031
YALI1_A19795g	1719	786	802	384	354	348	292	119	491	1166	247	281	39	280	519	442	707	520	950
YALI1_A19798g	321	120	74	70	86	62	53	57	88	247	31	29	6	39	79	100	118	108	211
YALI1_A19821r	90	2	8	2	2	0	3	12	10	6	2	4	0	4	4	2	6	2	3
YALI1_A19829g	1407	6774	5249	3500	3138	2966	2555	1903	3665	8607	1760	2244	257	2601	3907	3430	6521	4445	6648
YALI1_A19862g	1689	55	18	14	36	38	30	6	18	48	6	10	0	12	11	6	12	10	14
YALI1_A19885g	561	3396	3538	1911	1418	1628	1209	3314	2130	3738	950	1119	145	1406	1843	1013	3933	2289	3419
YALI1_A19898g	600	1822	1587	1010	886	986	699	1821	1138	2179	263	284	28	330	438	408	943	714	945
YALI1_A19924g	1674	11634	8557	5693	5304	5134	4224	5591	5843	13635	2853	3486	413	3988	5592	4630	10898	6630	10462
YALI1_A19965g	2847	5390	4323	2887	2576	2455	2060	1496	2834	7507	1698	2140	228	1995	3421	3036	5655	3842	6024
YALI1_A19974g	318	1624	1944	1119	905	772	639	1641	1138	2182	680	832	100	899	1377	734	3214	1546	2897
YALI1_A19989g	2694	8278	6227	4578	3804	3768	3487	4348	4669	10832	2313	2936	358	3283	5209	4323	8316	5691	8731
YALI1_A20063g	4485	32494	26659	16001	15603	14852	13187	23650	21549	38655	7724	9000	1069	10075	18074	15698	26564	19397	28481
YALI1_A20089g	942	3346	2247	1454	1574	1551	1282	694	1563	5293	1301	1407	158	1441	2358	1704	4614	2709	4441
YALI1_A20113g	600	10	4	0	6	0	4	8	8	6	2	2	0	0	2	2	12	8	2
YALI1_A20129g	783	2944	3783	1969	1234	1296	992	7362	1828	2935	631	670	122	809	1288	708	2263	1676	1856
YALI1_A20131g	1593	776	1468	710	304	398	309	720	491	1051	473	541	97	602	953	785	1527	1007	1609
YALI1_A20149g	1107	2994	2481	1568	1047	1315	968	1584	1414	3233	754	836	85	670	994	772	2051	1223	2028
YALI1_A20176g	1341	5792	3863	2912	2718	2690	2266	1867	3327	7819	1514	1540	208	1943	3180	2370	5097	3542	5186
YALI1_A20201g	1368	36	38	12	36	35	37	26	28	103	4	12	0	18	10	6	30	23	38
YALI1_A20221g	642	370	461	233	200	227	175	328	283	515	443	495	90	574	836	528	1688	852	1588
YALI1_A20229g	570	665	1373	619	369	400	305	1950	738	808	260	454	46	535	848	402	1642	998	1217
YALI1_A20242g	525	121	69	43	61	65	52	60	70	173	28	44	2	26	43	47	89	57	82
YALI1_A20247g	222	28	17	20	25	18	12	7	23	43	11	8	2	6	19	7	12	11	27
YALI1_A20258g	372	86	34	32	27	26	18	19	31	77	13	12	0	10	13	18	24	10	17
YALI1_A20283g	1689	1232	1135	778	588	569	470	163	774	1651	716	860	77	927	1446	1149	2312	1646	2243
YALI1_A20320g	2232	4499	4773	2815	1737	1912	1446	3748	2797	4347	1435	1559	191	1571	2349	1678	4280	2660	4156
YALI1_A20353g	1842	1138	1045	807	631	668	632	1458	1028	1653	203	354	24	537	972	781	1025	960	1307
YALI1_A20370g	669	16899	43730	31013	35308	27332	19543	68899	24238	45966	13280	20276	2400	28574	35828	28793	62956	38304	56216
YALI1_A20398g	1401	6716	5879	3799	4145	3356	3155	4193	3603	10721	1637	2177	238	2275	3711	2777	7669	4664	7688
YALI1_A20408g	2157	49298	42859	23765	21298	19507	15423	30023	22672	58602	13192	15929	2161	16689	26333	22979	56092	30700	51093
YALI1_A20441g	504	2222	2783	1291	1149	1010	893	1320	1338	3074	893	1069	135	1199	1801	1077	3719	2248	3262
YALI1_A20453g	1758	8682	7972	4652	4033	3581	3322	6423	4877	10228	2965	3667	371	3994	6449	5672	10484	7266	10617
YALI1_A20484g	1053	13624	5865	5858	6131	5053	4796	1643	6284	16876	9184	8819	737	9564	17401	16358	28266	16715	26164
YALI1_A20528g	1770	654	511	234	215	276	213	43	189	1495	227	222	28	204	333	347	691	457	866
YALI1_A20558g	3957	2622	2415	1338	940	1116	857	1913	1456	3200	677	963	79	880	1460	1109	2306	1558	2273
YALI1_A20602g	435	4453	3788	2477	1550	1495	1189	2386	2412	4224	1351	1670	220	1537	2261	1380	5400	2627	4295
YALI1_A20611g	759	985	749	585	468	349	351	371	618	1216	216	193	31	200	369	254	677	431	552
YALI1_A20631g	1935	7878	7450	3895	2945	3207	2573	3909	2666	11750	2511	2728	347	2974	3886	4192	9582	5717	10617
YALI1_A20685g	2472	5305	4343	3267	2762	2615	2363	1753	3369	6097	1623	1939	216	2296	3583	3040	5945	3968	5913
YALI1_A20739g	573	46915	41263	27974	23123	22580	20002	31243	26862	47753	12109	12788	1719	17888	19598	20891	34411	22979	34842
YALI1_A20760g	297	89	59	32	14	41	40	13	42	127	26	26	2	26	47	35	80	81	113
YALI1_A20793g	1869	2711	2452	1599	1415	1367	1278	1531	1523	4034	723	1008	110	1103	1597	1505	3132	2282	2879
YALI1_A20822g	1584	3633	4216	2587	1832	1856	1532	3632	2338	4475	1498	2084	300	2478	3521	2441	6122	4123	5850
YALI1_A20839g	480	18	12	10	18	13	19	13	17	24	4	4	0	2	6	4	10	2	14
YALI1_A20849g	390	3294	3546	2068	1705	1679	1115	3191	2163	4104	1114	1185	180	1522	2108	1482	4445	2504	3862
YALI1_A20855g	1899	6110	6961	3648	3352	3284	2442	4215	3469	8521	2545	3238	426	4273	5654	4566	11309	6155	10130
YALI1_A20884g	960	1861	1481	896	717	799	585	639	1030	2363	486	634	52	487	874	707	1430	848	1470
YALI1_A20902g	1215	10355	11841	6265	4008	4187	3236	8637	5378	10649	3485	3712	543	4583	6942	4047	12709	7786	11321
YALI1_A20937g	2133	29981	27509	17699	10463	11604	9560	13920	19924	32393	4540	4861	671	6784	10809	11167	14231	12253	17204
YALI1_A20965g	450	62	58	74	14	36	16	333	68	50	8	4	0	2	2	2	0	0	10
YALI1_A20995g	1236	94335	55265	34216	37845	34713	29764	49739	48119	86440	7383	6831	717	7691	13488	14491	20364	18522	24093
YALI1_A21000g	864	51201	19614	18054	14561	12976	11163	20943	23199	29235	1511	1111	100	995	2174	2022	2578	2718	3102
YALI1_A21012g	210	44	14	25	36	16	28	18	43	92	5	16	0	6	29	13	30	40	40
YALI1_A21021g	534	184	96	95	106	88	101	61	108	310	32	28	2	23	50	62	59	117	91
YALI1_A21040g	1446	1639	2247	1043	825	915	642	4837	1430	1617	449	504	58	666	1051	511	1737	1337	1620
YALI1_A21043g	522	4535	4455	2415	2268	2359	1948	3548	2633	6354	1656	2062	182	1976	3200	2183	6422	3576	6215
YALI1_A21057g	2976	2869	3670	2103	1703	1584	1446	3432	2156	4043	891	1113	117	1483	1769	1832	3111	2738	4010
YALI1_A21089g	1110	1154	993	577	446	450	442	798	635	1442	364	352	42	306	598	539	909	774	997
YALI1_A21106g	1182	1073	1081	609	489	502	288	451	806	1423	385	389	58	349	618	611	1170	772	1278
YALI1_A21120g	1386	1991	1650	1160	980	1003	869	1399	1250	2760	612	707	63	644	1052	886	1949	1400	1913
YALI1_A21156g	2118	11002	7772	5043	4817	4588	3892	5002	5570	13908	2840	3740	453	3700	6343	4881	11724	7160	10954
YALI1_A21175g	1566	922	456	299	261	282	256	280	414	841	78	169	16	66	134	79	196	151	165
YALI1_A21203g	2529	48092	27914	18972	22641	15889	15131	18019	13413	46565	3516	3128	152	1653	5370	5722	2871	8307	2793
YALI1_A21236g	2535	3702	1839	1522	1551	1278	1270	1033	1665	4236	886	912	75	886	1620	1751	2345	2171	2489
YALI1_A21265g	795	3503	2763	1552	1800	1640	1403	940	1732	5584	2170	2360	255	2612	4450	2900	8043	4677	7505
YALI1_A21277r	91	0	6	2	1	3	1	3	4	7	0	0	0	0	2	0	2	0	0
YALI1_A21283g	2088	500	481	226	166	215	184	310	259	545	142	162	25	120	160	123	411	237	369
YALI1_A21311g	660	3197	3096	1670	1640	1719	1294	3397	2031	4265	1013	1194	177	1457	2062	1819	4488	2468	3807
YALI1_A21345g	2232	7193	8864	4884	3228	3623	2424	21531	5657	6439	1437	1541	263	2320	2624	1618	5321	4334	5313
YALI1_A21372g	1005	4948	2326	1161	3994	5478	3138	2855	3776	10876	1347	1664	340	1464	1121	1558	6027	2895	5718
YALI1_A21409g	2613	5385	4507	2831	2278	2400	1877	2237	2962	7010	1612	1809	177	1392	2368	2249	4428	3389	4823
YALI1_A21420g	477	4533	3114	2162	1792	1645	1656	702	2377	5940	1529	1887	229	1697	2900	2029	5578	3197	5199
YALI1_A21449g	2391	7655	6509	4354	3624	3144	2911	2942	3827	9249	2415	2915	387	2820	4518	3848	7563	5349	7839
YALI1_A21477g	1527	286	167	90	300	253	282	71	170	871	150	162	8	88	163	152	261	162	331
YALI1_A21499g	507	0	0	0	2	0	0	0	0	0	0	4	0	2	0	0	0	0	1
YALI1_A21509g	1305	1136	1282	764	385	495	451	768	632	1320	516	647	83	547	777	695	1458	990	1357
YALI1_A21550g	2826	3271	3505	1993	1558	1498	1204	1759	1874	4424	1092	1345	156	1613	2167	1908	4097	2453	4089
YALI1_A21554g	591	1554	2110	1018	743	792	564	1208	769	1887	723	900	130	1171	1903	1025	3443	1971	2786
YALI1_A21565g	906	5791	7570	4272	2808	2946	2300	12060	4262	6245	1280	1748	252	2497	3503	1770	5694	4025	4834
YALI1_A21594g	1191	106	97	21	49	48	48	29	30	105	140	178	18	107	131	148	314	175	414
YALI1_A21617g	951	4448	4015	2138	1755	2044	1805	2400	1895	6240	976	1228	113	1078	1726	1368	3665	2142	3616
YALI1_A21620g	726	1878	1994	1001	738	716	666	1006	862	2855	599	634	57	642	1016	744	2177	1382	1954
YALI1_A21630g	1482	4477	5941	2670	1801	2165	1568	15601	2863	4309	725	975	99	1205	1885	916	2802	2187	2491
YALI1_A21654g	2667	3009	7278	3844	1390	1458	1164	4331	1796	3095	1796	2061	344	2580	4219	2747	6155	4005	5700
YALI1_A21696g	1431	6122	5198	2730	2417	2372	2170	3543	3016	7572	1667	2041	212	1716	3196	2533	5505	4154	5261
YALI1_A21711g	468	8094	8517	4455	4158	3567	3167	7942	5040	12581	2938	3622	328	3553	7331	3540	13457	7540	11156
YALI1_A21720g	1587	13140	11394	6102	5321	6224	4813	17682	6800	15384	2314	2823	372	4127	5448	4608	10052	6840	10383
YALI1_A21746g	1245	10125	10318	5867	4508	4740	3676	9232	5927	12621	2977	3842	476	4220	7007	4478	12709	8149	11209
YALI1_A21775g	438	56160	81614	42322	31050	28210	23521	99297	35180	75995	17067	24442	2066	22285	46487	16975	83311	52148	64892
YALI1_A21797g	2853	3820	3885	2019	1860	1994	1560	4816	2536	4854	804	1118	119	1211	1855	1610	3369	2333	3486
YALI1_A21835g	873	30725	29225	14541	10092	9779	7757	5614	12133	32467	7943	7059	836	9377	13526	13266	21288	14328	26434
YALI1_A21841g	444	14560	10755	6802	3907	3960	3378	2414	5264	12427	2545	2680	354	3361	5033	4967	7758	6029	10525
YALI1_A21852g	264	385	311	157	98	65	57	27	128	322	126	125	11	159	185	180	427	244	378
YALI1_A21871g	1467	4504	3421	2012	1181	1318	1104	169	1091	5861	2951	3023	382	4855	7159	7291	11489	8095	13116
YALI1_A21913g	2268	2211	2127	1031	1008	1020	864	262	858	3263	1199	1486	196	1855	2566	2519	5149	3153	5167
YALI1_A21919g	672	10912	12177	6836	5364	5286	4172	10177	6517	14682	3809	4525	580	5829	7050	5628	15005	8293	14094
YALI1_A21945g	1869	1915	2416	1279	926	1152	909	850	1321	2807	1258	1667	250	2031	2921	2654	5226	3468	5365
YALI1_A21970g	1221	1547	1863	1207	900	894	772	784	1159	2181	674	878	133	1148	1711	1243	2643	1730	2477
YALI1_A21993g	900	2706	2560	1729	1516	1644	1327	1915	1820	4298	1734	1965	308	2627	4089	2425	7338	4632	6769
YALI1_A22008g	411	2420	1962	1219	1065	1178	808	1170	1436	3092	999	968	127	1023	1614	1014	3121	1874	2762
YALI1_A22023g	954	1261	1110	775	580	546	554	1000	897	1682	216	342	52	287	449	232	891	570	894
YALI1_A22027g	354	1903	1716	1205	875	922	732	1072	1339	2535	642	705	94	740	1019	831	2464	1432	2455
YALI1_A22073g	2718	8229	6462	4443	4517	4434	3449	1617	4929	12734	5608	7050	868	8460	13138	11823	24486	15192	24912
YALI1_A22093g	495	4396	3681	2290	1890	1711	1432	1840	2432	4993	869	928	78	802	1331	968	2847	1862	2761
YALI1_A22105g	792	1735	1545	718	552	481	492	147	805	1996	700	647	85	635	845	975	1648	1204	1817
YALI1_A22111g	1626	2102	2138	1218	974	819	760	552	1006	3147	521	647	78	575	1089	696	1512	1101	1555
YALI1_A22129g	612	1546	1090	783	635	664	594	304	732	2225	601	759	75	655	1286	866	2144	1343	2098
YALI1_A22137g	1767	1363	1102	668	492	518	442	71	744	1741	298	317	36	306	620	511	962	547	1024
YALI1_A22157g	2085	6450	7986	4145	2780	3041	2285	20813	4584	5439	780	926	138	1340	2030	1078	2662	2571	2762
YALI1_A22192g	1731	4639	3356	2432	2655	2618	2568	2890	3520	5971	1187	1344	196	1857	2392	2380	4336	2859	4984
YALI1_A22228g	1581	3286	5054	2566	1948	2023	1563	9699	2431	4062	1079	1573	176	2059	3293	1798	4715	3337	3936
YALI1_A22236g	1314	1619	1571	989	436	476	476	978	759	1408	250	287	29	316	475	399	904	541	874
YALI1_A22275g	1728	11163	22188	11572	6630	7785	6291	160581	11033	14170	2484	3162	415	4677	7110	5226	10333	8173	11234
YALI1_A22330g	309	3110	3517	1844	2245	2181	1869	2812	2522	6401	1178	1745	109	1714	2680	2437	6267	3861	5782
YALI1_A22369g	267	6724	4859	3545	6337	6970	4722	12267	6374	9875	2566	4660	525	1916	2962	1574	5890	3355	4085
YALI1_A22393g	1194	907	633	485	382	233	305	1279	529	667	143	205	12	116	197	318	326	1160	171
YALI1_A22415g	1068	14	17	6	28	27	16	18	8	61	50	77	3	44	80	61	74	93	91
YALI1_A22440g	1071	3772	4387	2939	3138	2871	2188	3078	2890	6883	1677	2100	189	2038	3306	2164	5828	3766	5660
YALI1_A22454g	1119	11901	55638	51273	72373	58604	44815	74137	31074	92951	104219	138682	12901	163231	251406	199123	367324	250789	373250
YALI1_A22496g	1812	6224	6451	3831	3130	3186	2965	10183	4326	7677	153	283	26	162	465	199	454	671	369
YALI1_A22497g	675	4	0	0	0	0	0	2	0	0	0	0	0	0	0	0	0	0	0
YALI1_A22539g	1932	3	3	0	4	1	0	0	0	11	12	6	0	0	19	2	65	26	23
YALI1_A22551g	879	199	211	88	90	81	80	176	151	215	53	65	8	64	95	93	213	131	192
YALI1_B00037g	1086	12	8	2	2	14	3	7	10	20	2	0	0	0	0	0	3	2	6
YALI1_B00049g	660	712	741	391	279	304	224	600	459	783	170	224	12	186	241	223	627	388	514
YALI1_B00082g	1431	62	39	25	37	40	52	15	32	105	45	79	4	34	72	53	122	64	126
YALI1_B00101g	276	13	30	11	15	14	13	7	19	24	5	10	0	10	21	14	17	13	14
YALI1_B00121g	633	104	103	47	46	60	36	34	69	147	55	70	10	61	84	76	138	92	156
YALI1_B00133g	1572	955	1111	717	677	574	533	267	625	1983	856	881	122	1252	1396	1414	3105	2063	3782
YALI1_B00165r	77	0	0	0	0	0	0	0	0	0	0	0	0	0	0	0	0	0	0
YALI1_B00198g	2994	5041	4846	3091	2673	2594	2391	7408	3408	6263	1069	1437	164	1594	2670	1883	4315	3364	4144
YALI1_B00214g	1245	3320	3779	2005	1755	1673	1272	3365	2135	4995	790	978	105	1026	1984	1167	3496	2073	2928
YALI1_B00242g	792	6405	5420	3570	3024	2750	2471	5568	4088	6824	1229	1463	181	1678	2469	1958	4994	3304	4386
YALI1_B00273g	1740	4196	3898	2377	1736	1689	1450	770	2128	5000	1643	1593	226	1942	2243	2363	5024	3195	5215
YALI1_B00280g	750	2322	2142	1467	1124	1146	857	927	1412	2884	840	873	113	1022	1397	1240	2553	1843	2553
YALI1_B00297r	81	0	0	0	0	0	1	0	0	0	0	1	0	0	0	0	2	0	0
YALI1_B00298r	119	0	0	0	0	0	0	0	0	0	0	0	0	0	0	0	1	0	0
YALI1_B00329g	1170	17	10	9	21	4	13	9	18	33	8	12	0	8	6	2	28	2	13
YALI1_B00336g	522	0	1	0	0	1	0	0	0	1	0	0	0	0	0	0	0	4	0
YALI1_B00357g	1740	109	46	77	80	96	59	93	54	110	12	14	2	18	14	22	27	13	17
YALI1_B00383g	330	6	6	3	3	0	0	0	1	8	0	0	0	0	0	0	0	0	0
YALI1_B00419g	243	10	0	8	2	0	0	0	2	5	0	0	0	0	0	0	0	0	0
YALI1_B00429g	906	98	71	36	48	49	50	11	54	132	15	16	2	5	27	19	44	21	24
YALI1_B00448g	1233	7703	5661	3141	3348	3579	2983	1235	3293	11056	3254	3834	457	3709	6449	4951	12635	7226	11331
YALI1_B00483r	102	0	0	2	0	0	0	0	0	2	0	0	0	0	0	0	0	2	0
YALI1_B00525g	2781	6524	7354	4267	2745	2869	2271	5959	3554	7464	2481	3068	364	3594	5892	4443	9882	6136	9567
YALI1_B00539g	780	2668	2601	1514	1324	1271	1039	1417	1430	3659	1103	1239	149	1356	1707	1589	4172	2591	4072
YALI1_B00578g	1752	7503	7288	5426	4983	5345	3596	3870	5315	11639	1954	3120	514	3793	5543	3364	10342	5510	8838
YALI1_B00607g	582	2297	1522	1296	906	947	848	706	1299	2499	235	273	35	316	563	478	739	649	940
YALI1_B00611g	2379	5296	4218	2864	2246	2141	1812	1662	2530	5729	758	889	115	867	1361	1265	2552	1838	2402
YALI1_B00675g	1770	5962	5919	3815	3389	3240	2754	4679	3719	8870	2399	3313	370	4263	6779	4608	11801	7733	10434
YALI1_B00704g	564	253	262	112	66	112	76	135	151	307	92	110	5	61	72	55	258	114	231
YALI1_B00711g	267	99	100	41	25	49	47	50	75	160	33	51	3	28	46	47	80	63	110
YALI1_B00719g	228	30	40	22	20	42	38	40	77	82	12	15	4	13	29	40	60	61	65
YALI1_B00731g	321	80	67	53	32	21	35	47	56	136	16	27	1	23	48	56	48	85	115
YALI1_B00798g	765	53	51	38	102	91	65	42	102	153	180	247	28	235	348	278	714	421	646
YALI1_B00819g	246	125	118	32	175	151	110	43	104	444	651	715	82	806	1471	887	2858	1527	2664
YALI1_B00829g	708	484	482	146	488	528	413	128	472	1300	1687	1824	330	2433	3590	3079	6571	3682	6996
YALI1_B00858g	360	4	2	6	6	6	9	6	11	9	14	18	2	16	10	11	61	30	46
YALI1_B00908g	417	14907	12732	7056	5964	6091	4421	11138	6883	16708	5110	5658	636	5627	9145	5859	17067	9400	14826
YALI1_B00977g	414	6289	4484	3047	2739	2442	2430	3738	3534	7144	1831	1737	201	1508	2709	2215	4432	3393	4281
YALI1_B01011g	219	50	58	25	23	29	15	15	24	90	24	26	2	41	65	62	74	66	106
YALI1_B01014g	474	120	99	51	29	44	40	44	48	203	35	38	4	64	84	78	118	112	143
YALI1_B01030g	996	1927	1253	808	967	824	666	376	530	3323	571	561	39	406	800	1045	1619	1509	1508
YALI1_B01060g	309	1793	1232	709	767	1113	628	249	754	3892	932	700	126	613	884	1180	1636	1484	2643
YALI1_B01065g	270	824	734	432	410	548	356	130	439	2003	547	481	51	321	476	555	974	801	1438
YALI1_B01069g	234	315	327	188	209	161	97	390	178	360	97	74	5	133	258	176	362	190	323
YALI1_B01084g	1041	6189	6619	3729	3112	3190	2244	10200	3991	7343	1356	1763	208	2169	3812	1927	5911	4457	5559
YALI1_B01127g	285	129	77	35	40	33	18	58	35	95	29	49	2	22	61	35	106	77	113
YALI1_B01136g	561	17986	19540	10801	9333	8531	6220	21714	10910	20382	5704	7072	1066	8831	13356	8303	23775	14225	20909
YALI1_B01223g	513	0	0	0	0	0	0	0	0	0	0	0	0	0	0	0	0	0	0
YALI1_B01268g	498	15	0	8	2	3	0	2	0	8	0	0	0	0	0	0	0	0	0
YALI1_B01275g	282	107	77	45	54	81	53	42	69	164	56	89	6	85	126	80	199	139	255
YALI1_B01281g	462	124	93	59	66	97	58	37	69	209	104	117	17	123	148	145	347	237	270
YALI1_B01292g	300	173	119	83	100	81	67	83	87	184	35	59	1	36	82	44	96	78	139
YALI1_B01317g	1026	93	85	82	43	68	53	84	112	121	178	235	47	449	567	532	1029	609	1158
YALI1_B01325g	423	1273	1259	737	263	331	291	485	575	970	434	488	58	409	425	494	1556	807	1612
YALI1_B01334g	237	149	157	87	59	63	56	62	59	207	112	76	12	101	126	160	344	194	287
YALI1_B01344g	204	2	4	2	0	0	0	8	6	2	6	8	2	4	44	8	27	21	28
YALI1_B01352g	216	13	29	5	16	14	17	15	17	50	7	9	0	7	10	18	30	22	51
YALI1_B01357g	315	52	35	10	17	31	20	9	22	53	11	7	2	11	12	11	34	18	37
YALI1_B01428g	1113	8247	9955	5221	4466	4471	3319	17453	5880	8645	2113	2820	419	4185	5913	3456	8986	6591	8127
YALI1_B01464g	798	12031	14348	6318	5703	5942	4459	8680	5098	17496	6400	7585	882	8993	14588	9758	28735	14132	24351
YALI1_B01485g	294	55	26	20	29	31	26	12	43	73	36	27	4	42	60	28	133	42	81
YALI1_B01511g	1743	3476	2677	1948	1723	1868	1479	874	1886	5222	1243	1507	194	1662	2278	2346	5023	2988	4933
YALI1_B01550g	480	47	16	31	20	18	4	13	17	22	6	7	0	6	6	3	12	15	11
YALI1_B01552g	1314	1965	1905	1080	887	912	702	1432	982	2411	555	737	93	892	1322	1110	2482	1507	2528
YALI1_B01568g	228	667	851	486	264	321	231	557	371	806	335	344	24	302	491	272	1072	551	1154
YALI1_B01578g	474	8402	4268	3840	4480	3822	3268	3897	4637	8979	1467	1532	112	1649	2934	2542	4789	3047	4508
YALI1_B01628g	1548	29116	43822	20645	16334	20039	12254	114633	22116	28576	5839	7247	1215	13061	16298	8959	25643	17722	22237
YALI1_B01644g	1494	5452	5115	3069	1992	2176	1635	3174	2647	5797	1545	1694	225	1817	2516	2186	5530	3538	5204
YALI1_B01698g	1926	12442	17101	8825	6374	6569	4915	63229	9571	11259	2024	2558	428	3844	5994	3115	8439	7177	7942
YALI1_B01711g	564	1045	808	609	550	502	444	634	665	1284	316	349	42	363	730	542	1056	782	1086
YALI1_B01719g	258	1416	1081	886	515	626	517	888	766	1731	525	431	57	608	725	727	1298	810	1385
YALI1_B01725g	282	694	526	342	247	253	211	417	406	765	219	260	27	240	365	339	674	415	740
YALI1_B01752g	942	12148	15907	8171	6213	6472	4559	24540	8038	13675	2929	3829	534	5113	7981	4050	14286	9078	12180
YALI1_B01760g	273	89	51	45	34	41	35	25	56	105	61	62	2	58	67	74	220	134	227
YALI1_B01771g	285	215	107	107	63	90	61	38	95	178	62	81	8	63	141	82	220	113	185
YALI1_B01813g	3111	7720	6784	4690	4202	4185	3473	9181	5282	9740	1900	2518	284	2896	4674	3882	8331	5361	7654
YALI1_B01822g	219	21	13	15	11	15	8	9	19	27	3	0	0	3	4	2	4	4	7
YALI1_B01826g	390	72	60	34	28	30	20	45	58	80	10	13	0	3	10	21	26	13	37
YALI1_B01839g	2721	4766	6430	3659	2529	2706	2001	16712	3521	4584	951	1235	160	1575	2554	1634	4203	3088	3828
YALI1_B01878g	567	164	132	54	53	21	29	28	62	121	4	2	0	0	4	9	19	1	4
YALI1_B01889g	285	768	660	340	272	241	197	284	409	741	243	249	16	183	302	307	628	389	584
YALI1_B01892g	360	1016	944	466	346	326	235	352	501	1141	257	267	23	248	410	383	729	513	692
YALI1_B01903g	465	1158	990	513	456	478	428	703	625	1441	361	353	45	381	699	524	1206	921	1277
YALI1_B01962g	1668	4276	2426	1990	1695	1647	1586	957	2284	5374	582	559	52	561	900	890	1800	1247	2118
YALI1_B02011g	834	1378	1250	801	539	552	479	641	773	1599	434	497	72	514	698	750	1476	1134	1550
YALI1_B02021g	330	629	608	318	253	237	230	271	324	733	300	258	37	249	466	339	606	506	734
YALI1_B02035g	747	55	39	34	26	53	28	21	40	105	32	46	4	30	54	49	105	103	117
YALI1_B02047g	1380	201	134	97	131	159	155	107	123	343	85	127	16	125	134	131	277	171	316
YALI1_B02073g	240	2	8	1	1	1	0	2	5	7	22	17	2	14	23	17	47	26	63
YALI1_B02082g	306	3	1	1	8	11	2	0	1	12	32	22	10	26	36	26	54	39	57
YALI1_B02091g	4221	18929	17629	10979	9131	9110	7715	17950	10620	25603	4795	6955	624	8410	14454	9685	23411	15370	21542
YALI1_B02149g	567	1022	1037	541	387	423	315	814	579	1084	352	371	57	386	627	408	1114	754	1127
YALI1_B02151g	234	1328	1157	570	665	693	592	777	952	1743	634	795	102	761	914	684	2675	1444	2490
YALI1_B02162g	222	492	410	224	174	225	154	165	204	380	220	271	29	149	252	158	624	338	552
YALI1_B02177g	1179	713	619	379	319	404	277	397	433	1015	322	377	57	371	538	420	1115	664	1109
YALI1_B02194g	1590	11225	7012	5271	6125	5016	4684	3412	5239	13146	2746	3053	231	3149	5587	4678	8626	6621	7718
YALI1_B02228g	2559	3612	2987	2108	1665	1723	1518	2468	2196	4768	916	1117	150	1250	2215	1483	3671	2606	3424
YALI1_B02283g	1665	1198	699	627	640	651	553	158	645	1434	444	697	75	468	766	615	1348	929	959
YALI1_B02345g	2292	36240	50689	26401	17459	18102	15047	25072	22263	44918	8547	11466	1607	19121	27719	15047	41664	29115	41278
YALI1_B02375g	2127	17549	14287	10000	8718	7932	7136	12608	10105	20313	5469	6851	781	6929	12721	9566	21345	14664	18318
YALI1_B02415g	1665	11428	8625	5319	5178	4797	4541	4707	6075	14577	4079	5195	643	5075	8249	6580	15462	9354	14198
YALI1_B02430g	1614	1926	1572	806	646	610	609	631	1052	1955	356	392	58	440	848	597	1338	910	1321
YALI1_B02465g	1398	1370	1193	721	459	541	386	729	742	1585	202	230	24	227	349	293	767	555	864
YALI1_B02472g	834	3907	4195	2187	1328	1498	1174	2594	2173	4390	639	582	88	582	776	676	1666	1189	2010
YALI1_B02482r	90	0	2	0	0	0	0	0	0	2	0	0	0	0	0	0	0	0	0
YALI1_B02487g	210	10616	8759	5910	4753	4410	3700	8329	6044	12545	3437	4807	335	4298	7913	3413	17711	8387	13704
YALI1_B02496g	876	3802	3147	1988	1162	1274	1085	2345	1852	3684	1009	961	100	1045	1474	1118	2787	1796	2867
YALI1_B02506g	1131	3503	3166	1787	1161	1123	1039	1913	1825	3709	768	771	107	950	1333	1382	2342	1868	2621
YALI1_B02533g	1146	1764	1759	894	951	864	734	1134	1173	2624	609	802	60	818	1474	1000	2576	1658	2462
YALI1_B02550g	2904	14925	12620	7404	6627	6264	5123	6727	6948	19053	4317	5084	589	5219	8522	7114	15258	10145	15640
YALI1_B02604g	432	196	156	121	70	52	77	78	133	185	70	107	12	47	159	109	272	180	255
YALI1_B02637g	1290	1860	1650	1012	917	913	598	1831	1027	2117	473	526	58	451	720	561	1547	952	1438
YALI1_B02642g	1875	7915	7087	3789	3828	4152	3414	8993	5211	10366	2026	2237	258	2504	3955	3242	6360	5003	6603
YALI1_B02672g	675	3489	2258	1423	1323	1200	1098	1268	1490	3816	911	1045	118	1064	1873	1207	3552	1823	2996
YALI1_B02696g	1131	26504	20676	14632	16463	15564	12766	32942	17677	36053	6624	8351	1038	13225	16442	16287	29405	19125	27755
YALI1_B02717g	633	1941	1872	1100	714	734	540	2036	1136	2135	521	501	58	460	910	485	1626	1000	1547
YALI1_B02733g	1647	883	780	410	325	334	280	259	456	895	99	145	9	99	139	164	309	194	292
YALI1_B02767g	1365	5165	4245	2867	2641	2800	2141	2721	3164	7045	2618	3248	443	3351	4613	3690	9450	5559	9345
YALI1_B02781g	855	4913	4713	2967	2816	2596	2171	3086	3253	7066	2735	3137	360	3165	5119	3808	10229	5879	9431
YALI1_B02806g	579	3615	3098	1933	1517	1403	1188	2205	1926	3955	714	777	86	828	1392	900	2489	1510	2377
YALI1_B02833g	1581	1225	973	593	569	587	552	179	659	1709	1418	1476	171	1317	2455	1928	3993	2795	4099
YALI1_B02850g	312	341	300	205	148	180	105	219	158	429	97	100	13	105	178	79	308	163	246
YALI1_B02874g	1860	10439	10230	5756	3503	3849	3047	9859	5096	9921	2257	2545	399	2913	3736	3357	7205	4713	7502
YALI1_B02881g	894	6545	7013	3853	3067	3307	2464	11167	4290	6311	1662	2274	308	2817	3700	1901	7036	4373	5932
YALI1_B02910g	1755	19	14	8	18	6	5	18	8	25	6	4	0	6	6	0	14	2	8
YALI1_B02923r	92	1	1	0	0	0	0	5	2	0	2	0	0	0	4	0	0	2	2
YALI1_B02931g	1416	2100	2326	1318	782	953	698	2175	1381	2132	558	635	81	567	992	644	1417	973	1520
YALI1_B02991g	3786	18688	16208	11138	10467	9217	8573	18193	11896	25021	4258	5378	613	7217	10647	10190	18457	13857	18877
YALI1_B03021g	669	62	33	18	18	9	25	25	23	29	6	2	2	0	4	8	3	8	6
YALI1_B03041g	1164	2231	2169	1161	693	826	670	1803	1087	2314	496	621	92	575	751	759	1624	1171	1902
YALI1_B03043g	585	2450	2408	1277	948	1032	809	1684	1399	2725	778	867	125	973	1297	1116	2574	1563	2471
YALI1_B03085g	2649	310	298	169	123	93	90	147	137	227	55	78	7	80	117	84	171	120	213
YALI1_B03120g	594	4	0	0	2	0	2	0	2	8	0	0	0	0	0	0	4	0	4
YALI1_B03168g	336	258	258	159	124	139	113	161	147	362	120	158	15	153	259	194	498	341	531
YALI1_B03198g	1302	25492	20089	13592	14301	13042	9605	19314	13977	32081	7896	10649	1594	12563	18632	15284	38641	20918	34331
YALI1_B03225g	954	791	671	409	425	382	326	434	546	1091	73	93	7	72	136	93	186	102	228
YALI1_B03244r	81	2	0	7	6	5	0	17	5	15	5	4	2	2	10	7	14	17	13
YALI1_B03288g	240	66	46	31	39	54	38	65	42	154	14	30	1	22	52	26	70	28	111
YALI1_B03290g	423	333	237	206	161	191	170	260	199	418	81	107	5	102	118	127	357	205	335
YALI1_B03299g	231	84	81	78	129	101	49	109	111	229	85	122	5	106	168	91	278	202	346
YALI1_B03314g	486	3289	3696	2085	1566	1733	1382	3917	2388	4067	871	1288	153	1356	1938	1070	3859	2229	2973
YALI1_B03324g	552	66	61	44	52	32	30	51	46	85	86	111	16	96	150	104	333	202	270
YALI1_B03335g	660	4621	3873	2526	2578	2191	1958	1995	2443	7323	1984	2119	195	2366	4652	2675	7536	4407	6135
YALI1_B03404g	2751	4473	4727	3207	3187	3120	2346	9313	3606	7088	2054	2549	325	4168	5373	4494	9066	6631	10163
YALI1_B03429g	246	163	142	93	75	88	72	238	106	216	54	53	19	59	81	70	236	143	286
YALI1_B03516g	513	10	4	2	2	6	2	3	4	4	9	2	0	2	6	0	10	10	5
YALI1_B03556g	288	948	869	541	333	271	239	520	505	974	183	152	18	128	308	224	374	242	392
YALI1_B03610g	387	14	2	4	8	6	5	2	5	16	2	0	0	0	4	0	6	4	11
YALI1_B03644g	3069	36885	32842	19648	20657	21631	17993	65458	29076	50087	6765	7602	718	8553	14846	12092	24331	17557	25448
YALI1_B03673g	453	33	49	27	31	26	10	43	40	44	3	9	0	8	18	14	42	28	46
YALI1_B03685r	72	1	0	0	0	0	0	1	0	1	0	0	0	0	0	0	4	0	0
YALI1_B03719g	2883	6405	6542	4058	3416	3092	2613	4383	4252	8183	2048	2644	364	3125	4581	3786	7927	5009	7196
YALI1_B03761g	2631	872	702	432	397	384	378	568	461	1142	70	102	11	111	240	160	257	214	305
YALI1_B03797g	249	121409	88367	49091	53370	53407	39834	94071	47753	127419	25541	23291	1823	22245	35339	35076	64788	42036	63450
YALI1_B03807g	900	3168	2254	1572	1405	1184	1035	1812	1503	3862	833	944	102	806	1710	1055	2392	1739	2160
YALI1_B03832g	762	22	2	3	2	4	7	2	4	27	5	8	1	4	10	18	22	24	12
YALI1_B03853g	705	2970	3159	1517	1993	1914	1569	4967	2094	5794	1019	1255	110	1180	2051	1327	3702	2531	3459
YALI1_B03867r	86	0	0	0	0	0	0	0	0	1	0	0	0	0	0	0	0	0	0
YALI1_B03910g	4458	18488	13270	9489	4924	4559	4374	36058	5818	13628	1771	2107	248	3097	4752	5290	5631	4599	5819
YALI1_B03963g	1710	2244	1904	1357	1070	1271	900	848	1470	3156	763	714	111	1015	1505	1196	2615	1542	2620
YALI1_B03979g	2292	16605	15037	8591	6950	7427	6033	15710	9291	19610	3609	4993	550	5077	8090	5705	14300	9954	13209
YALI1_B04007g	1335	43	19	13	10	18	20	20	20	34	12	10	2	10	12	2	27	8	12
YALI1_B04023r	91	33	23	24	13	10	5	20	17	12	4	9	0	4	17	9	25	13	7
YALI1_B04032g	1977	32818	21156	16014	14461	13366	12342	10224	17246	39454	10903	12371	1380	13432	21610	19279	37234	25772	35631
YALI1_B04068g	3630	794	696	449	326	301	278	813	397	992	92	92	10	85	141	139	301	232	246
YALI1_B04123g	1608	11591	10651	6303	5160	5285	3881	11207	6111	13708	3644	4170	512	4465	7489	4976	14428	8502	12604
YALI1_B04138g	789	47346	30376	21667	25416	21666	16610	41044	25095	48621	16915	19535	2555	22385	33055	28560	69691	41974	58380
YALI1_B04200g	4962	10895	9057	6038	5165	5153	4473	12751	6755	13584	1978	2812	377	3338	5367	4462	8475	6058	8890
YALI1_B04212g	1299	3116	2230	1425	1111	1151	957	1110	1327	3760	797	969	101	879	1511	1310	2635	1537	2765
YALI1_B04228g	1140	555	500	253	221	217	193	224	312	688	203	215	43	183	401	369	835	428	740
YALI1_B04248g	1518	7374	6973	3997	4270	4222	3228	5100	4550	10280	2396	2891	345	3534	4957	4320	9569	6631	8955
YALI1_B04274g	2664	9349	8129	5281	4745	4572	3723	3142	4951	12731	3835	4791	546	5492	8883	6759	13990	9496	14822
YALI1_B04309g	516	6620	4682	3065	2990	2366	2254	2904	3246	8043	1744	2012	219	2106	3316	2191	6062	3221	5077
YALI1_B04321g	2940	17448	13730	9340	8569	7835	6828	9976	9484	23240	5034	6416	635	6473	11244	9157	20178	13389	18728
YALI1_B04370g	1674	6440	6031	3479	3282	3420	2799	6206	4003	8829	1553	2073	272	2431	3974	3076	6850	4333	6236
YALI1_B04391g	1686	5795	5166	2724	2513	2650	2173	5106	2992	7471	899	1142	145	1233	2113	1388	3713	2607	3673
YALI1_B04433g	1197	8151	8629	4543	4796	4337	3517	6733	5772	9769	3105	3903	446	4013	6592	5438	11622	8574	10348
YALI1_B04466g	423	2210	2232	1268	1111	941	812	2340	1247	2546	501	562	65	632	991	571	1511	1149	1367
YALI1_B04470g	603	9357	7651	4303	4161	3717	3301	4884	4791	10116	2516	3027	368	3085	5004	3579	10382	6338	9119
YALI1_B04497g	1668	4278	4031	2211	1489	1615	1216	3282	2177	4527	1198	1306	177	1434	1976	1627	3652	2177	3824
YALI1_B04502g	699	2550	2429	1547	753	989	752	2652	1311	2360	883	681	76	802	1123	930	2154	1369	2068
YALI1_B04523g	1314	1057	1014	640	550	572	481	642	654	1559	549	616	57	731	1161	800	1965	1263	1784
YALI1_B04540g	894	7668	7784	4240	3460	3323	2627	9243	4845	8634	2013	2332	272	2415	3364	2575	6657	4069	6048
YALI1_B04559g	1128	2755	2293	1644	1314	1362	1212	2816	1621	3500	778	890	72	1013	1550	1479	2702	2063	2568
YALI1_B04577g	321	16	14	14	13	2	0	11	13	13	1	10	0	7	3	1	14	4	16
YALI1_B04579g	243	12	22	6	12	6	2	10	8	22	12	4	0	1	1	2	8	4	4
YALI1_B04589g	774	12448	8203	5539	5001	4615	3898	4973	5506	13883	3614	3621	432	3597	6187	4561	12134	7105	10426
YALI1_B04637g	1668	566	510	289	244	238	185	394	338	796	407	399	46	456	726	581	1395	770	1391
YALI1_B04663g	279	22	21	11	3	9	7	13	8	21	8	10	0	8	4	6	21	18	25
YALI1_B04690g	600	2720	1737	1471	1417	1589	1279	5908	2204	3166	489	560	81	974	1312	1335	1434	1224	1749
YALI1_B04703g	693	2500	1646	1390	1242	1305	1052	4623	1968	2763	570	605	56	942	1244	1137	1626	1255	1685
YALI1_B04747g	903	3089	3032	1701	1756	1522	1333	1702	1783	4707	1259	1535	176	1725	2682	2448	5384	3560	5184
YALI1_B04753g	609	2149	2166	1111	1041	1071	1009	1363	1016	3794	793	901	95	1080	1440	1396	2992	1861	3049
YALI1_B04759g	645	2128	2076	943	973	1000	850	986	999	3456	622	699	55	684	1078	929	2426	1151	2037
YALI1_B04779g	1050	3638	5057	2548	1034	1339	985	13103	2331	2441	656	665	93	881	1305	513	2038	1665	1923
YALI1_B04781g	1311	1155	1290	687	309	423	296	1905	714	1044	198	169	28	176	256	158	418	315	547
YALI1_B04803g	720	4008	3724	2292	1588	1559	1230	2332	1953	4599	1319	1644	159	1574	2927	1889	5676	3391	5258
YALI1_B04831g	963	1427	1764	823	743	707	514	4209	1021	1408	507	676	73	641	837	775	1438	1129	1440
YALI1_B04853g	732	26233	17840	12654	11410	10338	8792	16762	13815	26923	6343	6747	721	7400	11569	10413	23586	14439	22140
YALI1_B04873g	1287	2614	1916	1193	837	908	748	1520	1188	2832	509	567	47	548	874	752	1715	1141	1739
YALI1_B04901g	1248	3746	4043	2579	1628	1853	1420	3255	2264	4316	1385	1611	281	2119	2743	2121	5050	3185	4686
YALI1_B04910r	83	0	0	1	0	0	0	0	0	0	0	0	0	0	0	0	1	0	0
YALI1_B04937g	2220	9301	8931	4156	2940	3088	2739	5183	2678	10887	3270	4129	465	4347	6313	5871	13263	7821	12785
YALI1_B04947g	267	521	412	223	152	186	187	119	244	477	133	125	13	143	162	207	463	240	510
YALI1_B04950g	1764	3530	3151	1730	929	1139	780	867	1737	3506	1395	1660	189	1568	2270	2235	5640	3388	5303
YALI1_B04974g	2337	9546	7469	4838	3873	3863	3329	3658	4720	11802	2709	3268	441	3400	5680	4488	9138	6348	9115
YALI1_B05005g	648	3990	2241	1899	1898	1658	1374	660	1732	4031	838	772	103	875	1401	1387	2082	1687	2189
YALI1_B05024g	942	82522	66737	38040	34878	31134	27341	71868	36386	89473	24539	32792	4299	39562	58823	48543	104052	61363	87530
YALI1_B05043g	645	722	470	289	217	261	220	140	239	861	171	191	30	211	402	257	732	509	706
YALI1_B05053r	93	1	2	2	0	2	0	3	0	0	0	0	0	0	2	0	0	0	2
YALI1_B05072g	1212	10702	30571	13464	5922	6191	5007	22002	7128	13078	4438	5425	674	7224	12039	6952	18476	12305	16642
YALI1_B05106g	747	5380	5938	3410	2929	2920	2209	8225	3475	6357	2383	2934	446	3741	5119	3654	8839	5552	7532
YALI1_B05123r	87	0	0	1	1	0	0	0	0	0	0	0	0	0	0	0	0	4	0
YALI1_B05185g	5430	12176	9353	6725	5446	5195	4814	9498	7379	14020	2735	3494	335	3684	6495	5225	9503	6945	9693
YALI1_B05201r	72	0	1	2	1	0	2	2	2	4	2	0	0	2	1	0	6	3	2
YALI1_B05226g	2085	13878	10443	7090	6039	5841	5332	6528	7311	16820	3644	4850	543	5423	8498	6746	14360	9326	14161
YALI1_B05242g	843	2999	3493	1891	1136	1316	924	7571	2037	2339	633	663	133	784	1147	537	1910	1296	1863
YALI1_B05265r	84	0	1	0	2	4	0	0	2	1	0	0	0	0	0	0	0	0	0
YALI1_B05282g	1497	3466	2834	1801	1307	1342	1084	1043	1841	4296	1055	1192	106	1028	1776	1725	2692	2139	3063
YALI1_B05288r	92	31	58	41	21	16	12	41	37	39	9	16	0	20	11	13	62	19	70
YALI1_B05295g	564	419	1043	1150	1221	1359	799	2031	996	1978	290	528	43	446	774	319	1427	899	1276
YALI1_B05313g	1170	4389	4023	2224	1539	1614	1455	2455	2643	5283	977	1093	89	1029	1824	1297	2922	2326	3372
YALI1_B05350g	2592	8268	8428	5927	4362	4433	3273	4643	5315	11611	2378	3239	415	3891	5950	3758	10509	6286	8646
YALI1_B05364g	1530	202963	176133	103280	100563	96968	76359	216357	108313	247099	53257	73517	10662	89201	130634	103290	245137	136383	220865
YALI1_B05404g	1413	2377	2017	1060	1128	958	911	2977	1418	2747	594	615	100	689	1362	888	1976	1571	1837
YALI1_B05420g	681	5439	5004	3062	2532	2512	2019	3310	3185	7396	1708	1837	205	1916	3700	2357	6033	3749	5375
YALI1_B05438g	873	3153	2515	1692	1492	1467	1225	492	1709	4564	1240	1423	189	1425	2475	2041	4895	2831	4242
YALI1_B05454g	1698	4052	2884	2140	1941	2123	1689	2749	2400	5004	1009	1336	181	1418	1936	2135	3836	2424	3845
YALI1_B05483g	912	4651	3633	2212	2099	2096	1465	858	2301	6449	1642	1779	191	1672	2854	2140	6080	3078	5363
YALI1_B05497g	450	13580	12759	7474	4944	4967	3959	24573	7753	11473	3073	2829	373	2865	4789	3284	7434	5723	6388
YALI1_B05520g	975	6961	7694	4383	2396	3006	1955	14064	3709	5478	1501	1461	261	1913	2461	1691	4539	3019	4508
YALI1_B05522g	1731	5129	4102	2666	2095	2042	1821	607	2342	6740	1450	1879	246	1845	2937	2396	5570	3583	5382
YALI1_B05571g	2940	27099	25300	15615	12794	12895	9885	28455	15781	32287	6638	9144	1179	11441	17630	12362	29962	19733	27827
YALI1_B05609g	2262	38	22	12	26	28	31	585	56	127	10	4	0	6	0	10	38	27	24
YALI1_B05639g	306	67	41	38	22	20	16	50	26	91	34	46	2	44	66	24	115	64	126
YALI1_B05646g	321	45712	77082	37049	24731	23392	19440	102258	33061	58717	14044	21385	1632	19389	33622	11815	74311	40300	61113
YALI1_B05690g	435	2483	2921	1530	819	901	649	1964	1323	2564	997	1212	181	1181	1670	1137	3554	1907	3803
YALI1_B05698g	264	511	437	267	172	178	134	225	196	546	319	315	39	288	488	312	1012	514	960
YALI1_B05711g	1767	7454	7712	4635	4166	4117	3004	7578	5121	10009	2649	3545	517	4924	6318	5138	11683	7321	10414
YALI1_B05730g	225	219	249	135	176	133	92	179	114	342	137	154	10	161	394	161	566	365	488
YALI1_B05762g	2586	8679	7016	4934	4178	3598	3516	816	4370	11059	3295	4183	515	5554	8927	7648	12639	9537	13408
YALI1_B05782g	522	68	71	41	28	29	20	21	35	113	8	29	7	13	25	29	87	59	59
YALI1_B05798g	1593	61789	51911	33853	26150	25546	25065	27762	31735	66506	11097	12534	1552	17481	27820	20514	35760	21037	32840
YALI1_B05830g	624	2	0	2	0	0	0	0	3	4	0	0	0	1	0	0	0	3	0
YALI1_B05832g	3309	8078	12597	6793	4520	4664	3186	57010	7812	6993	1053	1508	277	2487	3140	1857	4993	4162	4654
YALI1_B05891g	882	6067	5200	3342	2796	2875	2293	4425	3876	6489	1035	1024	118	1192	1736	1531	3411	2461	3263
YALI1_B05947g	3282	2845	2509	1485	1137	1256	956	1880	1627	3073	737	852	112	901	1256	1134	2170	1479	2531
YALI1_B05954g	237	50	59	33	17	24	17	28	43	92	247	297	28	189	421	263	756	408	737
YALI1_B05964g	807	1605	1511	1044	1080	992	763	921	1168	2527	566	646	96	753	1216	921	2484	1351	2181
YALI1_B05971g	1227	1973	3119	1603	890	902	731	1697	1138	2212	967	1075	133	1098	1797	1152	3327	2172	3378
YALI1_B05984g	531	31	64	31	36	20	18	36	25	68	17	20	0	14	79	15	72	44	52
YALI1_B05995g	579	7867	7198	4567	4609	4481	3387	6817	5409	10035	3103	4266	602	4710	7045	4434	14323	9122	12013
YALI1_B06015g	615	953	1235	676	445	461	470	901	622	1359	308	333	50	452	580	610	1214	730	1278
YALI1_B06028g	4443	14455	12609	7318	7234	7468	6666	10085	6435	25923	3961	5021	585	5888	8618	9123	16695	11135	18801
YALI1_B06089g	474	132	135	71	69	70	75	166	84	163	48	23	2	29	68	27	162	99	146
YALI1_B06110g	990	11169	7510	4841	5333	5665	4520	8096	8929	12453	1528	1586	278	2939	2919	4698	5022	4831	8629
YALI1_B06134g	459	648	728	302	180	199	108	280	344	555	37	51	3	55	90	105	173	126	178
YALI1_B06141g	258	369	376	206	83	89	90	126	237	237	81	68	11	61	85	95	188	129	180
YALI1_B06146g	366	167	144	73	45	36	32	79	107	130	115	102	3	79	133	114	223	150	230
YALI1_B06207g	426	235	145	104	100	93	102	42	73	344	87	120	8	108	154	180	396	346	333
YALI1_B06245g	1476	3825	3825	1923	1317	1420	1137	1882	1979	4109	989	1119	98	1005	1839	1340	3150	2139	2949
YALI1_B06264g	507	67	57	34	53	49	31	57	64	109	8	40	6	26	36	36	82	33	61
YALI1_B06315g	2775	3768	2505	1972	1370	1534	1470	435	1882	5183	1041	1208	108	911	1477	1328	3007	1915	3002
YALI1_B06324g	468	701	518	287	244	234	273	241	320	818	170	209	39	184	329	271	585	310	574
YALI1_B06328g	240	253	211	121	126	171	113	75	172	485	115	106	6	91	207	153	292	166	320
YALI1_B06340g	2661	1560	996	559	617	584	512	446	700	1620	396	593	86	563	992	790	1481	1086	1677
YALI1_B06398r	71	0	0	0	0	0	0	2	0	0	0	0	0	0	0	0	0	0	0
YALI1_B06399r	119	0	0	0	0	0	0	0	0	0	0	0	0	0	0	0	0	0	0
YALI1_B06447g	1920	8891	7471	4181	3786	3429	2729	2977	3156	12202	2529	3153	329	3220	4745	3747	10839	5275	9661
YALI1_B06469r	72	0	0	0	0	0	0	0	2	0	0	0	0	0	0	0	0	2	0
YALI1_B06487g	474	1190	1308	629	558	529	401	1538	786	1293	391	395	39	437	674	451	1216	909	1189
YALI1_B06489g	1374	2440	2017	1259	798	848	781	2571	1375	2202	492	550	70	730	974	815	1571	1188	1816
YALI1_B06508g	267	520	409	246	116	149	114	410	210	305	107	112	12	170	169	165	277	229	343
YALI1_B06514g	264	474	446	215	150	191	138	476	283	424	133	155	31	128	177	221	424	196	401
YALI1_B06537g	447	552	393	243	167	142	140	74	248	534	255	278	22	212	385	339	826	469	758
YALI1_B06546g	204	63	45	18	6	21	14	20	32	56	9	7	0	7	4	2	15	18	11
YALI1_B06607g	855	5229	3446	3923	3016	3427	3814	1673	5152	7324	2181	2034	320	2579	3430	3594	6461	4276	6680
YALI1_B06613g	561	40	36	19	17	35	43	10	8	65	22	25	0	28	43	36	74	78	96
YALI1_B06620g	513	90	91	39	26	19	47	24	41	84	64	53	16	42	89	83	180	119	148
YALI1_B06628g	294	140	120	56	78	63	61	23	57	177	73	89	16	101	98	69	243	184	266
YALI1_B06635g	234	243	222	116	62	103	45	54	115	335	101	122	16	103	136	119	384	264	371
YALI1_B06640g	363	316	386	164	107	127	76	88	175	409	129	125	20	120	190	119	354	237	455
YALI1_B06644g	384	1016	949	493	317	353	235	286	440	1064	368	434	62	356	407	375	1017	613	1295
YALI1_B06692r	74	4	7	3	12	2	4	6	5	18	7	0	0	0	6	8	18	8	16
YALI1_B06704g	1236	4045	3531	2165	1827	1896	1619	1957	2266	5223	1342	1661	185	1538	2863	1921	4800	3076	4544
YALI1_B06726g	255	1333	1180	937	455	479	371	800	793	1443	603	602	70	509	910	382	1836	966	1462
YALI1_B06735g	318	1297	1976	899	634	621	475	4124	1107	1616	375	549	59	660	1059	480	2101	1261	1689
YALI1_B06745g	2697	4343	6467	3424	2418	2895	2054	30357	4493	4068	677	867	148	1391	1917	917	2748	2439	2807
YALI1_B06776g	1014	751	658	419	255	236	218	727	369	711	49	69	4	52	90	68	128	106	91
YALI1_B06809g	1734	8668	5715	2902	5461	5270	4573	1069	5495	15571	7074	8022	813	8460	14411	11648	25657	16514	25009
YALI1_B06839g	546	20333	22727	11141	7122	7847	6524	10999	10604	23544	5218	5446	696	5646	7556	5917	14994	9715	15781
YALI1_B06847g	660	19870	19802	10694	9842	9410	8209	18639	11061	23912	7117	8442	1019	10802	14077	12142	26259	15274	24447
YALI1_B06866g	1599	3405	2757	1783	1471	1472	1321	1198	1919	3904	1929	2169	280	2491	3484	2931	5840	3910	5349
YALI1_B06885g	207	67	59	38	28	20	16	17	39	96	53	36	3	39	57	32	141	40	81
YALI1_B06892r	74	0	0	0	0	0	0	0	0	1	0	0	0	0	0	0	2	0	0
YALI1_B06928g	2349	7726	7177	3875	3820	4312	3499	9490	5200	10660	3141	3783	595	4882	6688	6118	10461	8379	14060
YALI1_B06969g	231	8	17	4	0	0	6	22	10	11	2	10	0	0	6	2	8	8	20
YALI1_B07043g	1239	51	35	21	28	36	31	27	34	74	13	33	0	15	31	38	58	20	46
YALI1_B07076g	1218	15074	11184	7414	8230	7673	6439	7458	8354	24262	5848	7084	632	7150	12428	9614	21276	14080	21256
YALI1_B07094g	1572	11300	12237	7115	6624	6219	4816	19051	7184	15241	3592	4670	576	6130	9016	6363	15690	9900	14150
YALI1_B07134g	2325	18759	15888	9158	7298	7181	6016	22010	9937	20251	3771	4714	545	5173	8402	6727	13055	10028	13824
YALI1_B07162g	1845	8997	10171	5184	3615	3857	2958	9666	5068	9861	2450	2839	389	3275	5325	3440	8126	5926	8161
YALI1_B07203g	573	200	213	133	107	92	87	100	163	218	42	78	29	141	90	97	192	145	267
YALI1_B07210g	735	1946	2130	1041	902	940	695	1029	1184	2693	727	870	81	868	1427	1001	2464	1625	2547
YALI1_B07220g	2424	3403	3148	1980	1212	1309	1103	3109	2110	3488	888	970	131	1154	1797	1369	2763	1993	2740
YALI1_B07271g	2277	22482	12489	8593	8933	7792	7452	7082	10210	25421	5380	5192	434	5375	11042	8600	14968	11736	17345
YALI1_B07284g	786	15055	10688	7593	7267	6236	5522	11246	8103	16419	4642	4690	409	4173	7363	6502	11786	8217	11982
YALI1_B07295g	1437	10306	8941	5396	5311	4965	4067	10698	5336	12183	3559	4033	446	4433	7069	6274	11182	7546	11999
YALI1_B07331g	627	19832	15706	9708	8823	7545	6467	15566	10961	21389	4256	4575	388	4176	8680	5475	13323	9873	14078
YALI1_B07366g	1719	25605	33883	16848	11276	12251	9025	83079	16953	24156	4062	5410	703	6732	10780	6009	16041	12697	15113
YALI1_B07374g	1233	8076	6629	3880	2969	3220	2599	9108	4229	9233	2017	2187	236	2156	3421	2606	5538	3976	5842
YALI1_B07399g	771	2332	2369	1472	1025	1018	815	2334	1328	2841	827	936	129	830	1445	868	2633	1468	2357
YALI1_B07413g	618	1896	2339	1352	738	647	581	703	1050	2191	774	804	84	558	899	569	1687	1031	1403
YALI1_B07444g	2226	3730	1803	1295	1660	1697	1487	261	1382	7300	3111	3744	396	3299	5139	4414	10339	5606	10872
YALI1_B07500g	1056	1312	802	645	576	655	555	2116	980	1552	191	140	19	180	171	274	370	263	385
YALI1_B07538g	264	3136	3670	2484	1288	1393	1246	2602	2058	3810	1364	1919	170	1654	2559	1304	5481	2630	4280
YALI1_B07549g	1461	3730	2559	1649	1679	1587	1331	591	1741	5075	1857	2383	283	1929	3037	2715	6308	3759	5604
YALI1_B07578g	1206	253	153	91	104	91	89	181	109	282	33	66	6	65	98	62	202	105	176
YALI1_B07598g	4632	22823	14979	11591	10206	9352	8575	13718	12597	24880	4777	5589	723	7066	11195	9658	18114	13156	18529
YALI1_B07652g	633	15273	14006	8153	6205	6269	5341	8633	8720	16127	4161	6094	496	4720	7885	3695	19469	11906	14810
YALI1_B07675g	1560	2580	2542	1492	1080	1154	888	1585	1397	3336	773	788	85	824	1144	1152	2527	1664	2643
YALI1_B07696g	1194	797	552	385	474	359	391	346	608	1202	272	236	28	275	512	434	927	868	849
YALI1_B07735g	1728	8663	7377	4369	4278	4396	3576	4488	5590	12219	2359	2587	367	3447	4460	4125	8762	6412	9907
YALI1_B07762g	825	2158	2232	1117	950	952	814	1703	1379	2962	431	537	53	444	999	588	1551	1165	1611
YALI1_B07769g	846	3138	3419	1824	1621	1605	1363	2777	1867	3920	922	1107	142	1306	1826	1435	3557	2112	3183
YALI1_B07786g	588	3545	3504	2065	1623	1782	1337	4449	2236	4503	1130	1345	210	1584	2253	1271	4408	2578	4065
YALI1_B07809g	1203	6275	6114	3729	3430	3440	2912	9894	4507	8112	1930	2447	310	3115	3730	3516	7802	4848	7874
YALI1_B07843g	660	2614	2815	1534	1396	1281	1053	1460	1619	3839	1385	1512	144	1396	2348	1713	4637	2556	3970
YALI1_B07852g	507	1274	1549	763	776	666	579	589	884	2283	1050	1491	179	1390	2854	1350	4871	2906	4132
YALI1_B07853g	375	349	438	233	187	199	161	85	253	582	160	191	36	230	410	266	789	580	821
YALI1_B07864g	1386	6513	5386	3633	3259	3148	2763	6522	3975	8241	1602	1995	196	1919	3139	2568	5527	4008	5058
YALI1_B07915g	3591	11361	10174	5031	3702	4275	3620	5613	3817	14541	3914	5207	598	5709	8261	7759	16442	10761	16785
YALI1_B07937g	417	69469	109428	47161	33593	34749	24281	163331	43705	73445	18717	23630	3100	26176	47106	18460	74295	48198	62428
YALI1_B07957g	1413	2296	2111	1388	1008	1090	919	2961	1432	2879	531	639	72	590	957	665	1587	1157	1543
YALI1_B07983g	9930	11814	8824	6428	5100	4683	4246	7366	6288	12549	2632	3371	380	3140	5367	4645	8977	6192	9508
YALI1_B08094g	858	11076	13779	5586	4442	4738	3894	8148	4741	14216	5015	5087	811	6808	9551	7566	18633	10497	17958
YALI1_B08102g	240	259	270	139	117	148	118	149	205	386	150	146	14	158	237	144	400	291	497
YALI1_B08110r	72	2	0	0	0	0	1	0	0	0	0	0	0	0	1	0	0	0	0
YALI1_B08123g	1023	2146	2487	1319	897	1083	793	2965	1407	2330	554	667	123	891	1362	840	2394	1539	2109
YALI1_B08134g	477	4	7	4	2	4	4	2	2	16	2	4	0	2	2	4	2	7	6
YALI1_B08143r	82	0	0	2	0	0	0	0	2	0	0	0	0	0	0	0	2	0	2
YALI1_B08156g	2502	3082	3255	1696	1252	1462	1283	240	1797	4259	1211	1819	267	2008	2718	1974	5154	3802	4961
YALI1_B08186g	363	1115	1135	608	286	276	253	228	447	880	528	532	52	347	601	378	1484	787	1375
YALI1_B08193g	960	6054	7577	3904	3313	3299	2597	9671	4591	7507	1688	2549	315	2769	4416	2424	7614	4931	5989
YALI1_B08207g	279	271	221	122	98	110	102	90	126	359	198	265	18	216	401	212	642	377	652
YALI1_B08214g	270	1998	1469	1056	961	913	841	853	1357	2461	1056	1090	123	1204	1902	1311	3598	2436	3355
YALI1_B08247g	471	221	115	83	140	103	76	168	126	259	65	99	3	47	69	58	115	144	112
YALI1_B08263g	531	3	0	0	6	0	0	2	2	0	68	188	6	4	10	65	60	153	35
YALI1_B08296r	94	0	0	0	0	2	0	0	0	2	0	0	0	0	0	0	0	0	0
YALI1_B08321g	1638	1033	724	463	491	433	385	138	488	1578	1272	1309	137	1486	2448	2070	3769	2670	3987
YALI1_B08374g	423	8060	6722	3915	2570	2540	2317	3215	4212	9016	2539	3419	336	3795	4681	4306	9465	6644	9824
YALI1_B08401g	1563	3254	2914	1662	1353	1415	1193	855	1877	4368	632	732	99	945	1254	1196	2322	1700	2610
YALI1_B08438g	1989	1448	3255	1484	656	737	497	1944	1046	1586	560	736	102	916	1318	884	2066	1441	2006
YALI1_B08461g	1638	125	133	69	52	87	51	54	56	163	437	610	47	123	132	102	271	238	208
YALI1_B08493g	1146	748	265	339	157	168	165	7456	609	951	679	713	67	196	411	414	2894	2351	2545
YALI1_B08531g	1830	580	515	288	294	316	263	399	309	871	243	293	36	288	465	360	866	546	909
YALI1_B08540g	3162	1905	5178	2249	783	793	718	2304	1200	2139	1098	1270	223	1867	2634	1788	4212	2621	3850
YALI1_B08575g	294	1343	1307	637	451	446	400	567	651	1643	525	422	64	319	603	501	1104	668	1131
YALI1_B08580g	294	862	917	519	360	339	294	470	466	1096	259	252	46	309	331	363	792	486	914
YALI1_B08588g	426	160	154	94	50	73	62	114	129	184	30	25	2	25	38	47	64	71	86
YALI1_B08616g	492	3940	3200	2075	1518	1431	1075	2798	1963	4497	1092	1254	121	991	1962	1158	3459	2540	3106
YALI1_B08627g	471	4900	6122	2979	2432	2165	1664	6839	2801	6071	1430	1795	161	1666	3503	1445	5186	3373	4159
YALI1_B08650g	2766	11900	10562	7471	5659	5602	4820	9521	8254	13656	2797	3790	496	4804	7400	5122	11651	7872	10938
YALI1_B08680r	89	0	0	0	0	0	0	0	0	0	0	0	0	0	0	0	0	0	0
YALI1_B08699g	1203	81	45	37	47	76	25	41	52	152	18	15	2	8	30	38	72	18	54
YALI1_B08721g	780	285	360	284	247	198	208	342	292	439	399	536	76	791	759	687	1462	1107	1461
YALI1_B08758g	1689	694	601	321	498	467	362	300	454	1291	221	303	22	374	541	625	854	687	1177
YALI1_B08783g	1155	2578	2807	1723	1518	1508	1173	1412	1738	3620	1027	1264	165	1779	2828	1620	4860	2972	4152
YALI1_B08801g	1194	2661	2197	1427	1232	1173	947	1265	1340	3520	1124	1337	139	1171	1974	1441	4254	2524	3801
YALI1_B08817g	1299	581	498	234	255	268	201	368	407	658	283	292	38	446	544	601	1070	718	1211
YALI1_B08831g	600	342	305	154	142	118	109	262	195	492	230	256	30	251	349	372	653	475	818
YALI1_B08851g	1260	5908	5138	3236	2777	2888	2240	4640	3350	6991	1940	2370	284	3028	4699	3716	8204	5370	7368
YALI1_B08868g	423	202	189	58	54	72	69	80	131	292	58	57	12	44	61	55	87	103	169
YALI1_B08885g	531	57318	60743	30051	22013	21291	16829	47961	26297	63769	17789	21240	2431	19749	33598	19511	67602	35339	58480
YALI1_B08898g	2340	4215	3508	2256	1812	1751	1659	3411	2437	4779	1175	1508	168	1688	2943	2372	4440	3552	4787
YALI1_B08975g	4824	4322	4989	2988	2083	2111	1785	9420	2813	4648	873	1091	116	1355	2274	1420	3082	2481	3196
YALI1_B08978g	1950	2443	1968	1169	959	1024	784	1346	1219	2798	492	651	80	595	1098	819	1812	1329	1845
YALI1_B09002g	1389	155	114	73	80	62	74	87	98	190	65	92	12	67	100	89	207	146	254
YALI1_B09025g	732	5551	5118	2968	2735	2375	2084	5951	3196	6431	1296	1951	201	2207	3575	2184	6855	4298	6137
YALI1_B09044g	1440	4358	4503	2301	2391	2343	1674	4492	2392	5529	1430	2010	248	1964	3630	2197	7034	3914	6004
YALI1_B09072g	939	2211	2564	1355	1046	1189	1026	2618	1795	3085	725	854	99	916	1263	1196	2654	1833	2859
YALI1_B09090g	612	16839	12592	8059	9926	9521	8688	11654	10589	21628	2962	3441	380	4161	6694	5265	14058	8262	13521
YALI1_B09117g	612	22	20	5	12	15	14	11	25	35	8	2	0	6	4	2	8	4	4
YALI1_B09132g	525	286	184	152	193	128	126	151	203	368	14	38	4	10	20	23	34	41	28
YALI1_B09144g	693	1253	1134	612	539	533	417	627	610	1500	531	598	75	466	817	615	1481	1126	1507
YALI1_B09161g	1242	7751	7869	4334	3115	3430	2656	6598	3876	9018	2280	2801	369	2868	3735	3010	9764	5182	8935
YALI1_B09181g	462	7	5	4	0	2	2	4	9	2	0	4	0	0	2	0	8	2	3
YALI1_B09211g	1014	805	512	429	287	321	410	22530	1102	675	12	35	4	53	23	42	101	59	68
YALI1_B09238r	119	2	2	1	4	0	0	2	0	0	0	1	0	0	0	1	3	0	0
YALI1_B09239r	72	0	2	0	0	0	0	0	1	0	0	0	0	0	0	0	0	4	0
YALI1_B09258g	918	2654	5044	2498	1210	1495	940	11635	2046	2812	760	895	116	1134	1556	892	2909	2037	2476
YALI1_B09266g	381	15071	12945	7700	6169	5338	4893	9123	7105	15783	6530	8060	763	6645	10207	6732	22406	11697	15434
YALI1_B09279g	414	598	822	480	367	292	276	828	393	756	324	384	44	427	723	352	1332	723	912
YALI1_B09299g	753	1471	1537	893	667	697	510	1929	1031	1894	531	595	90	654	991	745	2033	1150	1783
YALI1_B09310g	366	618	571	351	347	382	241	441	369	971	225	315	30	304	619	355	1178	739	935
YALI1_B09316g	240	237	216	109	101	90	71	182	144	245	64	63	4	41	82	64	146	61	177
YALI1_B09320g	399	2362	2152	1246	1148	1144	927	1769	1541	3074	486	589	102	890	1247	1095	1698	1086	1801
YALI1_B09333g	1029	5317	4303	2659	1966	2104	1807	3536	2600	5751	679	782	85	901	1609	1190	2499	1762	2634
YALI1_B09340r	88	0	1	2	0	0	0	0	0	0	0	0	0	0	0	0	0	0	0
YALI1_B09367g	861	7663	5933	3324	3733	3553	2898	2761	3579	9956	3168	4056	534	4363	7198	5059	14488	8533	12976
YALI1_B09426g	552	17	6	4	2	8	2	3	12	12	2	2	0	0	0	2	14	1	0
YALI1_B09448g	1365	2395	3673	1832	1183	1214	993	1720	1428	3198	1177	1505	220	1985	2734	2046	4974	3037	4509
YALI1_B09476g	492	49	66	25	18	8	18	15	29	53	19	21	4	21	42	46	76	44	87
YALI1_B09497g	1143	7858	4004	3664	3736	3495	3014	3123	4214	7682	372	342	43	414	479	734	958	851	1479
YALI1_B09518g	558	51	61	17	17	21	15	14	32	52	7	6	0	6	21	23	20	15	31
YALI1_B09568g	570	3663	4673	2391	1988	2042	1538	2713	2320	5771	1740	2328	280	2395	4073	2160	6417	3939	5417
YALI1_B09580g	288	103	75	21	52	57	37	17	38	111	12	13	3	11	39	23	28	32	25
YALI1_B09591g	468	69	68	56	39	25	29	46	43	63	20	21	0	13	33	26	76	82	81
YALI1_B09592g	1812	19076	18169	11597	10215	9480	8036	17126	11140	21700	4921	6790	790	8425	14134	8770	21995	14772	18943
YALI1_B09672r	94	0	0	0	0	0	0	0	0	0	0	0	0	0	0	0	0	0	0
YALI1_B09708g	2424	1204	2827	1298	615	649	493	1057	768	1496	520	757	134	890	1364	991	2129	1218	1847
YALI1_B09807g	7797	9807	6853	4915	5997	5156	4806	3555	5911	14406	3902	5030	586	6079	9876	8502	15287	9942	16693
YALI1_B09837g	2346	14289	12574	7816	6282	6067	5346	10964	7835	16023	3358	4156	484	4405	6741	5000	12365	7658	11897
YALI1_B09871g	498	1139	905	538	363	389	437	437	583	1199	302	372	25	316	559	536	862	732	959
YALI1_B09894g	2658	8541	8423	5522	5483	5473	4179	4927	5746	13598	3327	4621	657	7292	10551	8431	18832	12461	17728
YALI1_B09929g	255	236	187	147	102	86	98	64	190	291	58	56	4	40	50	46	113	64	163
YALI1_B09931g	261	153	117	92	63	88	44	41	98	210	49	46	1	27	56	60	95	97	83
YALI1_B09957g	306	339	218	157	129	153	110	106	207	447	114	88	12	104	155	165	251	171	305
YALI1_B09993g	888	2718	3220	1648	1695	1511	1267	1486	1335	5223	1953	2470	325	3420	4150	3778	9037	5640	9061
YALI1_B09994g	207	1727	2166	1063	1125	1159	954	1232	1092	3089	1230	1402	177	2332	2218	2553	4585	3352	6199
YALI1_B10032g	3573	16522	19564	10664	11744	10929	8713	13072	8464	36029	6020	6976	946	9626	13295	14833	29326	18487	31943
YALI1_B10094g	1164	465	484	323	111	131	112	271	241	397	167	205	44	185	168	183	915	413	719
YALI1_B10119g	495	63	55	28	30	21	24	49	33	76	31	43	14	62	82	30	151	72	171
YALI1_B10130g	1203	2669	3198	1609	1239	1381	1032	1863	1431	3791	999	1145	140	1280	1939	1365	3541	2370	3473
YALI1_B10145g	2433	842	815	550	405	463	394	741	537	1152	249	254	34	244	490	340	786	609	789
YALI1_B10170g	228	329	288	202	99	101	63	165	174	333	68	61	16	44	111	72	214	115	181
YALI1_B10182g	741	1596	1487	870	573	437	450	477	494	2068	683	710	84	703	1039	1015	2410	1304	2369
YALI1_B10185g	552	41	52	27	25	23	35	22	61	116	20	24	6	32	31	42	62	61	105
YALI1_B10231g	1797	2094	6587	5022	5447	5601	3747	3278	3789	8790	2569	4250	457	5756	8244	4512	13927	11178	13284
YALI1_B10263g	1422	25	17	13	15	14	16	23	18	34	13	10	6	3	4	18	9	18	11
YALI1_B10288g	1623	7	0	0	0	0	2	0	1	4	0	0	0	0	0	0	0	2	0
YALI1_B10359g	2883	39	24	24	28	33	29	32	29	87	3	21	0	8	21	4	19	24	14
YALI1_B10424g	960	18	2	2	5	4	5	4	4	17	4	2	2	2	2	0	9	2	6
YALI1_B10437g	714	7	8	9	7	6	15	12	6	35	9	11	1	4	18	11	34	10	20
YALI1_B10449g	543	2562	2760	1431	1724	1562	1287	2337	1720	4144	1079	1287	144	1670	2429	1778	5219	2999	4733
YALI1_B10463g	1626	5849	4858	2822	2294	2353	1996	1783	2873	7973	2491	3175	404	2979	5448	3789	9357	5872	9238
YALI1_B10525g	1041	3760	2977	1912	1648	1092	767	1463	1418	2851	111	123	6	125	303	243	243	266	235
YALI1_B10552g	1110	4437	5580	3027	2691	2742	1970	9533	3876	4726	1064	1489	231	2324	3292	1381	5424	3764	4554
YALI1_B10582g	2640	3998	3773	2371	1832	1794	1528	3045	2311	5218	1257	1713	222	1833	3273	2523	5336	3855	5478
YALI1_B10607g	723	19515	16119	9437	8315	8469	7852	14792	9248	22665	7967	9909	1441	15336	18056	18999	32766	21303	32170
YALI1_B10635g	768	8360	37861	19799	17135	15434	11154	27257	14487	34873	13633	17753	1702	19342	29817	18823	57912	37709	61131
YALI1_B10751g	801	222	350	173	108	91	70	828	164	316	107	100	14	119	252	168	307	246	283
YALI1_B10757g	264	37	21	9	2	10	8	12	21	29	38	54	13	54	65	73	98	74	101
YALI1_B10762g	273	241	216	100	83	60	74	112	117	237	73	52	3	31	78	90	136	115	127
YALI1_B10773g	783	506	457	243	130	168	145	174	238	386	117	73	11	85	159	175	227	191	281
YALI1_B10780g	456	93	116	66	52	35	27	63	65	119	33	23	4	46	61	40	81	82	88
YALI1_B10782g	555	194	164	120	51	48	42	103	104	129	30	29	4	23	51	60	142	75	126
YALI1_B10813g	1719	14670	43642	28477	26452	21519	13893	29138	20559	43623	15457	20761	2504	25049	41555	24350	71691	45346	63954
YALI1_B10891g	1236	5019	4359	3194	3308	3037	2555	6225	3885	7488	855	953	131	1379	2073	2009	2936	2153	3038
YALI1_B10933g	474	320	288	165	188	240	225	260	332	508	213	190	39	228	370	357	575	408	603
YALI1_B10943g	219	351	253	158	188	315	208	315	313	512	158	120	17	214	206	230	369	183	415
YALI1_B10990g	1788	1915	1921	1125	956	1041	915	1691	1166	2632	894	1385	138	1453	2145	1563	4353	2491	3828
YALI1_B11034g	231	240	218	107	68	54	51	95	107	143	104	59	4	99	121	131	224	134	287
YALI1_B11083g	2187	36675	36663	21115	17096	16841	13627	46142	20417	39904	8361	10633	1456	14718	23154	15034	36497	25056	32067
YALI1_B11111g	480	2065	1787	917	1129	1069	894	623	1099	3451	721	737	71	714	1361	1085	2432	1437	2413
YALI1_B11120g	393	3131	2522	1490	1246	1391	1202	972	1449	4301	861	1028	74	1008	1536	1447	2804	2011	3327
YALI1_B11131g	2601	26493	14719	13625	16817	14984	16460	8599	20401	35798	4478	5402	623	7137	10949	11540	18477	15040	18362
YALI1_B11167g	561	1614	1180	966	643	688	652	1256	930	2307	373	374	20	321	523	421	1017	639	986
YALI1_B11183g	444	2103	1907	1218	994	1035	834	1399	1182	2629	894	1013	112	901	1413	997	3384	1881	3101
YALI1_B11200g	14217	17410	17250	13912	5905	6530	4760	8844	10617	15727	3166	3531	502	4450	5142	4230	8568	6038	9260
YALI1_B11359r	119	0	0	0	0	0	0	0	0	2	0	0	0	0	0	0	2	2	0
YALI1_B11388g	1140	592	567	309	201	235	171	1628	426	386	102	123	23	158	231	160	356	199	366
YALI1_B11398g	516	698	733	420	384	293	247	2190	479	759	178	221	41	235	386	268	630	531	616
YALI1_B11402g	1110	2795	2144	1234	1148	1165	923	2066	1359	3024	491	578	49	596	1065	739	1875	1255	1694
YALI1_B11415g	555	95	55	56	36	36	37	39	58	124	31	43	0	23	74	53	89	53	69
YALI1_B11448g	1644	94	166	23	54	56	44	50	66	173	28	12	0	14	18	11	32	31	43
YALI1_B11484g	1632	8508	10296	5183	5850	5316	4156	7829	5100	15962	4017	4987	650	6859	10287	8625	20408	12619	18952
YALI1_B11495g	861	640	983	510	315	294	237	419	444	940	413	407	52	448	682	509	1433	724	1257
YALI1_B11519g	900	4090	4290	2368	1803	1884	1399	5886	2282	4548	1143	1235	149	1311	2272	1355	3530	2580	3317
YALI1_B11532g	1179	16440	16604	10505	8525	7672	6097	11958	10900	22256	4983	6375	986	9031	12041	9732	24303	13260	22299
YALI1_B11577g	228	32	21	16	14	16	16	11	19	22	12	10	2	8	9	23	29	25	37
YALI1_B11588g	315	44	36	22	16	12	9	17	26	30	15	22	2	18	55	20	74	38	71
YALI1_B11593g	204	195	154	122	56	71	75	110	131	244	81	116	14	79	132	79	209	152	210
YALI1_B11607g	1323	186	328	123	258	311	200	231	288	703	1808	2258	344	3596	3718	4222	7214	5436	9645
YALI1_B11625g	621	26	23	8	4	10	6	6	7	32	10	10	1	8	10	10	38	15	18
YALI1_B11639r	96	4	18	6	7	5	5	3	15	21	3	0	1	0	2	0	27	2	27
YALI1_B11648g	1473	4551	5357	3068	1525	1731	1253	11322	2414	3508	587	601	89	656	1308	495	1785	1687	1632
YALI1_B11666r	81	0	0	0	0	2	0	0	2	0	0	0	0	0	5	2	2	0	4
YALI1_B11681g	870	1834	1369	838	741	892	750	1468	1001	2177	623	650	70	709	1031	885	1825	1002	1684
YALI1_B11715g	1050	5451	5369	3098	2597	2853	2164	7544	3307	6522	1769	2281	398	3466	3826	3466	7474	5058	7477
YALI1_B11719g	246	9	8	8	0	3	1	10	4	13	0	0	0	0	2	4	7	1	6
YALI1_B11729g	360	162	218	92	50	89	47	106	80	200	127	116	4	156	204	154	559	294	540
YALI1_B11759g	1329	7007	6316	3864	2739	2785	2425	14068	4736	6701	998	1122	129	1535	2320	1427	3690	3024	3378
YALI1_B11781g	480	1156	1215	844	343	334	265	1053	529	983	292	332	40	255	712	184	1111	630	874
YALI1_B11794g	2145	10918	12321	6836	4279	4802	3719	35351	7160	9406	1557	2017	295	2341	3956	2264	5419	4422	5403
YALI1_B11853g	3024	14029	14811	9716	7255	7186	6486	9186	9076	20475	4652	6416	812	7516	11329	7786	21251	13775	17280
YALI1_B11878g	1350	2442	2309	1478	1030	1113	931	686	1313	2758	584	683	100	1187	1418	1662	2368	1865	2761
YALI1_B11916g	567	7278	7822	4414	3191	2958	2689	6005	4281	9167	1670	1763	192	1954	3242	1996	6358	3773	5557
YALI1_B11934g	561	69141	84033	45928	26486	26178	20682	121665	41444	61509	15501	22251	2945	21730	34798	16525	66539	41917	53841
YALI1_B11960g	513	7560	4463	3623	4643	3387	3315	4678	3902	8700	2107	2522	256	2634	4345	3226	7895	4860	6612
YALI1_B11978g	264	17	18	5	16	5	4	4	26	35	2	5	0	0	1	4	5	10	23
YALI1_B11983g	867	88347	57486	36455	30113	27604	23447	47650	42543	73105	12069	14382	1759	14437	23585	17425	47397	30792	47277
YALI1_B12010g	1374	10990	10071	5849	4813	4960	3890	8914	6210	12967	2891	3549	533	4291	6487	4468	11335	6953	10757
YALI1_B12042g	615	3460	3832	1749	1645	1815	1426	2541	2282	5110	1203	1356	231	1392	2223	1444	4538	2531	4062
YALI1_B12057g	630	5115	4309	2697	1906	1872	1554	1950	2529	6129	1731	1677	217	1786	2554	1973	4853	3089	5063
YALI1_B12101g	3324	2305	2600	1514	1574	1522	1208	2773	1848	3728	1627	2055	348	2780	3631	3328	6947	4944	7592
YALI1_B12150g	231	661	336	256	259	267	241	49	311	959	678	758	127	951	1185	1000	2801	1388	2700
YALI1_B12154g	633	708	509	274	434	508	375	64	372	1637	1173	1443	184	1392	2438	1854	5044	2395	4320
YALI1_B12195g	3234	3794	3838	2100	1674	1810	1472	4301	2226	4427	822	988	118	1306	1981	1547	3482	2427	3276
YALI1_B12204g	537	2169	2805	1522	1196	1343	990	5352	1706	2155	487	595	94	1101	1175	589	2303	1541	2041
YALI1_B12221r	72	0	2	0	0	0	0	0	0	0	0	0	0	0	0	0	2	0	0
YALI1_B12227r	120	0	0	0	0	0	0	0	0	2	0	0	0	0	0	0	0	0	0
YALI1_B12243g	1299	3502	4618	2600	1732	2136	1535	12168	2463	3460	658	905	133	1134	1805	926	2904	2379	2554
YALI1_B12267g	1728	2244	2265	1317	1034	1043	1068	568	1209	3326	765	899	133	986	1586	1500	2605	1915	2739
YALI1_B12295g	1380	774	492	425	394	366	326	315	391	881	159	226	32	279	374	393	699	448	766
YALI1_B12313g	279	349	297	151	190	142	128	288	167	444	105	188	11	183	399	129	740	389	548
YALI1_B12320r	87	0	0	0	0	0	2	2	0	2	0	0	0	2	0	0	4	0	4
YALI1_B12337g	906	16299	14298	8828	9844	10387	8056	9901	11218	24923	4291	5155	557	6361	10506	7322	18097	12283	16544
YALI1_B12375g	1422	947	825	363	383	385	219	218	507	936	435	452	47	364	577	557	1092	634	1316
YALI1_B12384g	255	88	81	36	37	19	39	56	72	98	50	30	0	16	44	35	106	62	83
YALI1_B12409g	1203	8459	7664	4103	3304	3563	2484	3473	4016	10880	3993	4495	683	7096	9184	7972	21680	11982	21293
YALI1_B12427g	876	1363	1552	869	707	714	490	1891	921	1589	311	343	42	375	747	476	1022	696	1056
YALI1_B12443g	480	3310	3290	1673	1405	1449	1191	1964	1925	3960	1482	1880	177	1920	2899	2108	6152	3565	5394
YALI1_B12451g	846	6346	5594	3534	2727	2663	2146	2943	3004	7806	2033	2351	212	1962	3691	2606	6455	4235	5616
YALI1_B12489g	1116	2051	1467	821	1213	2337	602	732	1647	2625	130464	167896	26911	207517	232853	199075	813652	321395	740226
YALI1_B12529g	9654	17642	13526	10396	7082	6790	6046	10041	9358	18848	5302	6884	829	7984	13207	10302	20081	12605	19756
YALI1_B12630r	72	0	0	0	0	0	0	0	0	0	0	0	0	0	0	0	0	0	0
YALI1_B12633g	2202	917	865	514	420	429	308	731	765	1035	96	160	15	190	203	147	372	310	488
YALI1_B12677g	2109	368	558	319	171	218	167	233	263	545	192	280	43	324	401	453	831	520	821
YALI1_B12691g	996	8407	7789	4339	4000	4050	3267	6746	4540	10783	2940	3376	402	3307	5759	3883	10369	6294	8842
YALI1_B12714g	1032	5	2	0	6	4	4	2	6	8	10	16	4	20	12	14	72	38	56
YALI1_B12742g	1392	9373	11868	6407	4786	4852	3981	7413	5864	12196	3280	4225	515	5562	7931	4917	13507	8700	12193
YALI1_B12781g	1689	15439	8965	7121	8808	9042	7670	1447	6838	29216	9162	12726	1497	15088	21674	17393	40166	24865	37256
YALI1_B12847g	2103	7947	8791	4697	3504	3633	2775	7893	4360	9232	2482	2768	427	3745	5332	3685	9225	6740	8854
YALI1_B12874g	576	3562	6465	2796	3156	2758	2071	4391	2732	8010	2081	2137	327	3114	4703	4069	9075	6447	10159
YALI1_B12917g	2001	7876	6175	4399	4471	3927	3430	3917	4263	12482	2120	2178	259	2713	4729	4183	7793	5835	7834
YALI1_B12966g	1509	2373	1322	927	1151	1543	1031	1792	1467	3684	2206	2644	336	1832	2027	3054	6959	4015	6542
YALI1_B12970g	738	0	0	0	0	0	0	0	0	0	1	1	0	0	0	2	0	4	6
YALI1_B12993g	1719	32436	14748	12216	13569	12241	10328	8727	16001	31149	10119	13915	1613	14228	22976	20449	45897	26053	42923
YALI1_B13041g	1668	1246	1313	821	543	657	527	2400	1014	1498	278	330	48	432	595	503	1053	894	1039
YALI1_B13069g	2259	1066	1167	772	490	427	426	610	647	1233	355	449	78	472	627	623	1261	889	1265
YALI1_B13112g	1809	1593	1194	755	704	787	593	852	849	1948	514	567	75	569	974	742	1859	1057	1702
YALI1_B13122g	471	632	798	435	263	294	282	453	465	774	196	255	31	242	325	269	656	437	631
YALI1_B13137g	567	4204	6638	3395	1957	1976	1301	19440	2873	3379	790	870	127	1223	1826	793	3072	2264	2562
YALI1_B13148r	86	0	1	1	0	0	0	0	2	0	0	0	0	0	0	0	6	0	2
YALI1_B13150g	1224	5110	4591	2558	2371	2414	1909	5833	2925	5765	1327	1766	201	1754	2942	1834	4887	3335	4541
YALI1_B13179g	1296	16109	13414	8385	7791	6993	5675	14371	9219	18794	4522	5750	663	5982	9698	6916	18837	10822	18179
YALI1_B13259g	2811	533	353	227	206	232	244	241	267	630	161	304	31	252	439	421	667	423	780
YALI1_B13290g	1497	2930	2589	1612	1036	1147	896	1933	1605	3224	800	953	115	1036	1595	1176	2894	1908	2821
YALI1_B13307r	86	0	0	0	0	4	0	2	0	0	0	0	0	0	0	0	0	0	0
YALI1_B13328g	1650	471	404	280	264	246	213	193	279	483	2135	2780	447	4451	5839	4707	8980	4427	6798
YALI1_B13355g	2175	5872	6140	3631	3076	2904	2501	4172	3801	8064	1905	2128	249	2331	3920	3220	6515	4904	6693
YALI1_B13388r	122	0	0	0	0	0	0	0	0	0	0	0	0	0	0	0	0	0	0
YALI1_B13401g	417	58	66	42	11	16	14	62	44	31	6	8	0	0	13	8	30	23	18
YALI1_B13411g	354	56	102	55	22	41	14	64	46	98	25	18	2	21	46	14	86	51	83
YALI1_B13439g	3390	43153	37308	29686	19851	18612	16959	46860	31480	44954	6142	6572	838	11769	16320	17565	18814	18403	22992
YALI1_B13483g	1035	4651	3846	2661	1525	1346	1326	2584	1936	4438	515	585	41	396	781	499	1686	822	1607
YALI1_B13536g	1695	5424	4944	3042	2188	2287	1755	5217	3178	5672	947	1053	138	1220	1740	1335	3537	2755	3433
YALI1_B13556g	2619	8859	6586	4283	4014	3843	3389	4574	5016	11483	2271	2754	241	2845	4764	3977	7296	5312	8133
YALI1_B13586g	1926	7669	10974	5655	3104	3814	2605	31155	5787	6139	1005	1298	220	2006	2684	1320	4214	3339	3954
YALI1_B13614g	1338	68	47	42	27	51	23	38	27	150	40	52	4	26	36	35	86	59	78
YALI1_B13641g	903	506	295	292	348	324	333	169	278	953	129	135	3	93	136	171	297	207	204
YALI1_B13662g	657	475	631	339	256	287	225	570	346	754	185	217	19	212	329	222	633	374	553
YALI1_B13699g	1260	11449	18245	10353	7231	7457	5794	60825	10984	11644	4973	6480	1049	12148	14945	9992	19542	12557	16648
YALI1_B13723g	1029	69	50	38	26	30	22	98	38	91	16	36	2	28	27	37	88	39	74
YALI1_B13737g	2925	2347	3753	2131	934	1069	797	2529	1471	2536	792	969	97	1172	1868	1312	2681	1747	2815
YALI1_B13800g	2172	4158	3757	2397	1570	1716	1299	6818	2249	3538	841	848	78	1131	1478	1446	2179	2068	2506
YALI1_B13828g	4104	8669	7834	5698	3823	3447	2932	4693	4727	9653	3145	3977	483	4854	7171	6285	11495	7594	11307
YALI1_B13886g	1275	935	1259	602	460	496	362	1857	672	1083	223	296	34	265	476	318	727	609	794
YALI1_B13888g	495	1745	1968	933	865	858	744	1507	1201	2265	729	776	86	774	1493	737	2333	1561	2138
YALI1_B13915g	1875	1579	2636	1373	712	750	659	1753	1006	1905	772	1060	205	1353	2127	1421	3191	2032	3143
YALI1_B13917g	570	1533	1909	1096	743	797	644	1632	1122	1955	414	569	81	588	794	581	1632	965	1581
YALI1_B13948g	1884	24906	18347	11249	11742	11304	9222	5775	12725	31992	9701	12179	1674	11620	20225	14458	37920	21468	32937
YALI1_B13973g	1851	17466	15626	9503	8622	8905	6882	22528	12021	20601	3723	4784	620	6062	9598	6127	15623	10814	13649
YALI1_B14013g	1794	1293	2065	881	536	481	430	389	667	1573	1148	1183	134	1284	1698	1302	3514	2360	3468
YALI1_B14044g	1041	27560	18489	11212	10175	10488	8404	9166	11442	27164	7211	7959	1116	9622	12376	11253	27858	15844	27788
YALI1_B14064g	3879	7803	6369	4149	3591	3456	3062	3021	4410	9798	2101	2784	332	2923	4936	4208	7814	5359	7969
YALI1_B14121g	573	19037	14980	8322	9903	8917	7687	15130	11060	23582	4144	5258	468	6628	9966	7272	18895	12443	17033
YALI1_B14147g	1095	3793	4344	2367	1577	1749	1406	2594	2009	4710	1475	1339	195	1801	2175	1983	4802	2723	4761
YALI1_B14150g	1716	9602	11372	6250	5353	5622	4062	19829	7192	10790	2102	2970	419	3722	6012	2808	9273	7028	8273
YALI1_B14187g	1617	12156	8916	6407	5891	5501	4288	7904	6310	15196	3937	4665	577	4690	7649	5333	15383	8556	12682
YALI1_B14194g	2175	5836	5022	3170	2494	2684	2094	2950	2929	7393	1734	2082	289	2340	3618	3018	6734	4123	6729
YALI1_B14236g	1830	9045	12001	6424	4192	4559	3344	37018	6642	8009	1524	1920	293	2564	3995	2201	6099	4410	5673
YALI1_B14238g	1476	3260	4701	2348	1731	1849	1334	12668	2707	3304	655	844	122	1095	1760	911	2703	1947	2256
YALI1_B14268g	1503	43	68	22	22	16	30	40	9	53	6	10	0	6	10	2	12	8	22
YALI1_B14292g	1935	32	46	8	22	14	17	24	10	38	28	22	4	8	20	22	51	20	28
YALI1_B14308g	936	630	550	317	294	363	290	377	375	824	282	351	31	364	497	429	937	615	871
YALI1_B14324r	81	0	0	0	0	0	0	0	0	0	0	0	0	0	0	0	0	0	0
YALI1_B14325g	2058	7432	7432	4041	2239	2397	1753	6996	3265	6244	1636	1743	256	1754	2172	1920	4710	3069	4878
YALI1_B14355g	1563	2926	2983	2043	1338	1352	1091	5993	2003	3239	624	813	85	1245	1846	1213	2731	1987	2628
YALI1_B14382g	936	16475	22727	13072	15270	14608	10478	24049	14455	27246	6355	9174	1209	12228	19307	9004	32309	19137	25528
YALI1_B14418g	951	11221	12566	6455	3925	4436	3514	7049	4665	13184	4493	5304	649	4946	7418	6433	15473	9667	14556
YALI1_B14441g	975	9203	11371	6070	4871	4826	3666	12764	5976	11630	3994	5286	824	8109	10186	7211	19478	10775	16563
YALI1_B14492g	3036	11718	10723	6688	5873	5860	4667	6072	7138	15911	3311	4495	673	5437	7620	6279	13806	8332	12387
YALI1_B14510g	243	120	120	43	42	42	34	59	61	151	28	31	4	26	56	14	85	32	59
YALI1_B14517g	555	273	396	214	110	158	100	216	162	431	99	90	10	114	184	144	336	212	304
YALI1_B14544g	2118	186	188	95	76	59	34	161	92	126	28	36	4	30	55	12	56	34	57
YALI1_B14569r	74	0	0	0	0	0	0	0	0	2	0	0	0	0	0	0	0	0	0
YALI1_B14573g	2430	4808	2926	2083	1643	1720	1444	1139	2219	5459	1446	1342	135	1087	2163	2076	3520	2657	4131
YALI1_B14600g	810	2279	2093	1255	963	1031	800	1768	1189	2691	899	1062	152	1164	1790	1243	3491	2141	2878
YALI1_B14615g	1395	9250	9332	5107	4153	4281	3328	6763	4623	12041	3581	3993	551	5372	7829	5637	13251	7669	12899
YALI1_B14645g	1401	537	470	291	273	279	221	90	363	816	194	268	35	269	423	343	651	536	880
YALI1_B14658g	729	874	856	544	559	460	405	598	555	1280	355	446	46	426	732	474	1309	794	1225
YALI1_B14680g	1023	4307	5681	3273	2418	2641	1800	9980	3199	4813	939	1443	211	1741	2773	1194	4455	3299	3777
YALI1_B14686g	285	2083	2320	1213	1047	939	956	1878	1287	2802	822	960	91	1004	1712	823	3209	1570	2783
YALI1_B14733g	4284	13276	8724	5884	5355	5412	4715	4413	7318	14455	2983	3348	405	3517	5781	5194	9535	6924	10325
YALI1_B14752g	2256	2316	2204	1322	929	1049	926	4382	1695	2449	572	605	62	697	946	721	1708	1417	1904
YALI1_B14793g	1794	9848	8763	4826	3395	3450	2767	9034	4839	9771	2526	2662	376	3118	4209	3703	7319	5074	8316
YALI1_B14801r	73	6	0	2	4	2	1	0	2	2	0	0	0	0	0	0	0	0	0
YALI1_B14804g	462	3757	3752	2036	1592	1509	1321	4592	2191	4226	1008	1123	173	1098	1712	1105	2944	1734	2878
YALI1_B14826g	1434	3264	3597	1944	1555	1874	1357	2068	1976	4612	1450	1832	211	1804	3062	2177	5399	3609	4807
YALI1_B14844g	840	1237	970	682	548	514	372	672	753	1380	388	462	80	446	880	454	1218	764	1226
YALI1_B14882g	3834	5650	5015	3050	2193	2266	1859	4447	3155	6459	1131	1438	137	1716	2469	2209	4109	2832	4347
YALI1_B14924g	1419	9427	9136	4122	4663	4926	4210	2792	4996	16060	5350	5816	726	6270	9567	8951	17683	11567	19837
YALI1_B14948g	579	5	16	9	4	0	1	4	12	17	0	5	0	9	5	0	10	9	2
YALI1_B14959g	315	1626	2940	1826	1650	1614	1226	3203	1599	3187	803	1211	120	1134	1604	832	3793	2306	3667
YALI1_B14978g	1077	1704	1725	983	708	825	646	637	862	2145	858	1194	174	1030	1634	1037	3093	2003	2880
YALI1_B14993g	216	2273	1874	1193	896	960	768	1659	1316	2636	540	700	85	646	958	632	2154	1187	2031
YALI1_B15015g	1350	5170	7308	4016	2675	2964	2336	24407	4834	5756	792	1162	149	1866	2894	1758	3654	3335	3615
YALI1_B15036g	294	90	88	72	27	46	44	105	63	85	9	10	2	9	8	10	22	8	23
YALI1_B15072g	3336	4710	4366	2518	1794	1889	1558	3754	2674	5041	964	1129	154	1133	1758	1594	2941	2376	3372
YALI1_B15092g	660	10992	10511	5915	5060	4837	4143	8204	6055	13525	3321	4275	464	4186	5749	4831	12131	6799	11099
YALI1_B15109g	1440	2138	6926	2915	1261	1359	1082	2966	1487	2929	1386	1781	222	2359	3999	2147	5626	3443	5081
YALI1_B15151g	2421	14892	10961	7854	6698	5854	5696	5982	7821	16514	2929	3190	303	3739	6792	6441	8858	6806	8874
YALI1_B15180g	651	3692	3651	1908	1624	1734	1463	1803	2264	4428	932	969	109	1034	1573	1358	2777	1568	2622
YALI1_B15192g	4251	7082	6913	4438	2385	2332	2069	4970	3679	6789	1083	1183	134	1205	1549	1638	2935	2177	3524
YALI1_B15237g	1506	4649	4488	2652	2225	2328	1780	3151	2633	5940	1228	1541	173	1853	2777	2033	4818	3034	4790
YALI1_B15275g	1776	8283	7569	4562	3921	3675	3212	7701	5242	10436	1816	2129	209	2666	3654	3680	6609	5304	7366
YALI1_B15301g	219	630	718	347	300	364	232	436	397	902	293	315	33	257	566	440	891	547	940
YALI1_B15307g	342	1068	1077	624	360	426	346	803	619	1231	402	423	68	419	605	531	1036	632	1147
YALI1_B15310g	3042	6145	4758	3152	2477	2514	2138	3145	3324	7469	1780	2220	248	2230	3475	3227	5980	4002	6450
YALI1_B15346g	1107	5633	5756	3255	2998	3067	2391	5703	3855	8400	1771	2042	273	2213	3381	2589	6294	4093	6219
YALI1_B15380g	2709	10601	8333	5116	4989	5053	4301	6891	5822	15058	3975	5109	608	6063	10233	8063	16369	10875	16436
YALI1_B15420g	642	212	202	119	155	137	87	585	198	339	244	239	47	273	310	346	547	312	740
YALI1_B15440g	1725	4041	3259	1812	2131	2137	1715	9103	3007	5539	777	1047	105	1304	2381	1832	2929	2625	3689
YALI1_B15460g	480	2	6	2	3	8	2	0	0	2	1	4	0	0	2	0	5	0	15
YALI1_B15475g	537	1789	1960	1048	694	663	524	1423	1087	1990	643	724	71	677	1158	746	2001	1264	2000
YALI1_B15482g	1353	8497	7851	4842	3902	3984	3552	6918	4998	11074	2627	3453	406	3583	5715	4164	9479	6314	8960
YALI1_B15509g	861	5609	4513	2710	2398	2285	2006	3917	3420	6661	1316	1452	159	1703	2929	1911	5325	3447	4856
YALI1_B15521g	2484	5676	5142	3178	2455	2517	2177	6564	3588	7140	1347	1413	153	1457	2279	2025	4119	3016	4550
YALI1_B15560g	735	4223	3330	2367	1944	1953	1556	2612	2623	5699	1328	1604	167	1904	2818	2229	4724	3257	4944
YALI1_B15587g	1452	6804	12378	5381	3407	3973	2673	53184	5596	6064	1129	1389	220	1831	3228	1162	4237	3313	3795
YALI1_B15592g	1038	111	118	67	53	50	67	277	115	188	72	38	15	57	129	103	180	99	157
YALI1_B15624g	1896	3282	3265	1532	1245	1474	1164	1614	1308	4509	1197	1543	162	1513	2322	1960	4794	2927	4755
YALI1_B15626r	84	3	1	0	0	0	3	2	0	5	2	0	0	0	0	0	2	0	0
YALI1_B15655g	2430	8927	7560	4517	3680	3999	3293	7964	4896	10834	2152	2526	312	2833	4765	3321	7587	4784	7415
YALI1_B15670g	1050	5	2	3	2	2	4	8	2	25	16	41	6	6	0	4	9	0	10
YALI1_B15692g	861	4000	5630	3143	1927	2076	1761	19330	3564	3643	718	952	145	1313	1987	1015	2821	2308	2730
YALI1_B15703g	315	12	14	14	27	4	11	71	5	22	5	7	0	6	49	2	49	40	43
YALI1_B15706g	2337	462	258	289	174	187	263	227	231	494	86	83	6	33	88	69	204	117	200
YALI1_B15733g	213	4606	4158	2645	3046	2134	2019	3457	2515	8710	1970	2616	133	1845	6673	2068	13110	7559	9906
YALI1_B15742g	2418	4031	2726	1812	1665	1754	1480	622	1951	5260	1014	1303	154	1446	2281	2367	3590	2623	4491
YALI1_B15792g	1794	26821	18172	11959	11948	10613	9913	10406	12869	35043	9435	11250	1237	12900	20824	17391	34859	23080	36501
YALI1_B15852g	2697	4819	5715	3018	2230	2440	1900	12262	3265	5253	916	1215	141	1419	2365	1639	3507	2664	3521
YALI1_B15858r	88	0	0	0	0	0	0	0	0	0	0	0	0	0	0	0	0	0	0
YALI1_B15887g	1209	1087	820	578	380	380	329	443	562	1130	258	236	28	285	452	327	781	535	783
YALI1_B15905g	1425	8386	9551	5337	4257	4118	3376	19275	6008	10413	2373	2994	306	3433	5381	3419	8084	6347	8132
YALI1_B15928g	978	6592	6855	3793	2720	2825	2168	9070	3585	6804	1194	1498	152	1659	3245	1955	4675	3627	4517
YALI1_B15943g	1545	8535	7282	4488	3663	3481	3005	3769	4439	10634	2541	3051	320	3103	4780	3983	7554	5237	7715
YALI1_B15964g	366	2440	2188	1255	988	938	936	1050	1194	3256	1119	1425	93	1078	1893	1094	3863	2031	3313
YALI1_B15988g	1827	2889	2819	1610	1353	1649	1298	1898	1829	4008	1039	1332	195	1317	2071	1598	3692	2191	3393
YALI1_B15996g	459	16021	15810	8541	8672	7732	7020	16838	9702	23172	5546	7350	555	5620	12146	6759	22894	13850	18930
YALI1_B16022g	3915	12192	11702	7107	5535	5506	5308	10028	6459	17033	5922	8247	917	7996	13541	13094	20291	16284	25207
YALI1_B16068g	1161	9731	9673	5298	4638	4399	3760	9802	5650	12579	2542	3312	343	3285	5194	3415	10858	6724	9351
YALI1_B16087g	672	21	22	5	1	10	0	4	18	31	8	12	0	16	10	8	22	27	14
YALI1_B16110g	2487	4547	6479	3325	2137	2379	1937	19923	3489	4449	597	798	103	985	1768	966	2174	2125	2206
YALI1_B16158g	1953	2386	1966	1133	960	1057	901	1064	1243	2823	704	854	119	816	1491	1255	2181	1533	2527
YALI1_B16194g	1536	4277	4821	2615	2370	2686	1975	14070	3591	4353	806	1096	160	1424	2337	1267	3915	2829	3519
YALI1_B16239g	3810	39663	45179	24496	17218	16534	14976	18030	22974	42042	9124	10781	1372	11183	17317	17463	29058	20439	31568
YALI1_B16255g	453	10	18	8	3	4	10	6	4	17	7	2	2	0	4	4	24	18	38
YALI1_B16277g	747	15679	15292	8781	8330	8100	7275	23549	10790	20258	3165	4152	458	5151	8693	6655	15590	9336	14204
YALI1_B16309g	1014	5736	4143	2330	1885	1822	1556	3197	2440	8115	1552	1538	131	1123	2367	1568	6080	3774	6048
YALI1_B16318g	2748	7490	6013	4350	3779	3677	2955	5757	4558	9624	1786	2509	331	2927	4412	3328	7703	5067	6888
YALI1_B16375g	1101	2493	2201	1713	984	850	751	10879	1677	1754	253	264	42	299	523	380	748	520	844
YALI1_B16410g	1692	3676	3039	1877	1404	1472	1246	2470	1975	4368	1031	1194	124	1158	1833	1574	3373	2145	3673
YALI1_B16419g	1611	15534	17853	11011	7487	8438	5722	35492	11254	15597	3137	4066	631	5466	8106	4460	13780	9400	11380
YALI1_B16446g	1395	7326	6317	4179	3401	3444	2894	4574	3765	9211	1848	2416	310	2621	4177	3038	7340	4518	6629
YALI1_B16477g	1014	9998	10858	6443	4912	4436	4080	11724	6381	12571	3319	4332	580	5274	8563	5068	14115	8772	12717
YALI1_B16504g	1167	3068	2940	2071	1765	1447	1324	1264	2067	3780	973	1183	206	1696	2792	1624	4116	2828	3682
YALI1_B16544g	1206	60834	59378	34199	24324	24137	17748	116960	33639	53589	9835	13108	1773	15854	22603	15449	40978	26638	36280
YALI1_B16566g	312	38	30	27	10	30	12	53	25	53	15	25	0	31	47	33	75	44	72
YALI1_B16572g	378	896	488	513	391	459	414	458	524	1039	162	243	27	332	560	487	707	667	1019
YALI1_B16578g	759	4245	2990	2404	1741	1947	1842	2678	3013	4907	760	993	142	1829	2059	2272	2958	2813	4183
YALI1_B16584g	2520	16583	16601	10010	7565	7590	6074	13345	10229	20108	5105	5774	706	7077	10454	8560	17878	13755	19145
YALI1_B16645g	1530	1986	1686	914	876	816	783	713	1002	2309	410	437	78	989	1104	1094	1824	1153	1823
YALI1_B16687g	1662	4111	4448	2423	1831	2020	1484	7680	2955	4225	795	902	88	1144	1761	1091	2735	2093	2732
YALI1_B16697r	105	1	2	8	0	0	2	4	0	4	4	0	0	0	2	2	4	2	2
YALI1_B16705g	3066	5762	3051	3040	2860	2748	2712	3395	3515	7747	712	1113	159	1974	3273	2742	3813	3277	4336
YALI1_B16735g	3423	11049	8889	6402	4667	4529	4062	5125	5898	12329	2786	3204	398	3310	4924	4184	10275	6284	9766
YALI1_B16808g	900	9951	11339	6958	4223	4223	4288	11706	6384	12242	2973	3631	383	4804	6726	6108	10152	8209	10216
YALI1_B16863g	2988	11771	8729	5409	4800	4840	4704	6776	4713	16380	2931	3671	473	4178	5549	5958	11100	7390	12175
YALI1_B16922g	684	306	148	237	102	105	105	240	158	286	436	288	30	326	692	737	1189	573	1063
YALI1_B16944g	1494	4932	3995	2555	2313	2172	1946	1811	2759	6862	1397	1516	181	1996	3127	2420	4578	3476	4855
YALI1_B16968g	339	20257	24744	14355	8296	9344	6668	29768	12107	21413	7158	8243	947	7616	14752	5443	26914	16979	20319
YALI1_B16996g	624	77518	104229	55602	38610	39684	26599	158686	51783	68472	17721	24012	4281	32281	45284	21208	86230	51244	69288
YALI1_B17008g	426	66468	105543	46268	29884	30973	21294	138273	39656	64688	16628	23040	3668	26426	40270	17814	69282	41339	61044
YALI1_B17039g	1212	1173	1602	824	495	527	396	1156	730	1313	521	569	84	603	966	601	1657	1064	1625
YALI1_B17050g	3342	3441	4589	2346	1633	1628	1360	3307	2298	4542	1393	1899	213	2291	3707	2627	5725	4018	5971
YALI1_B17105g	1959	3996	3748	2295	2082	2099	1770	2425	2190	5529	1195	1544	197	1741	2807	2149	4691	3037	4642
YALI1_B17112g	1116	5885	5584	3312	3019	3004	2406	6618	3489	7500	1632	1975	202	2210	3934	2188	6060	4136	5256
YALI1_B17132g	447	2832	3172	1736	1437	1606	1177	4037	1972	3092	725	1159	156	1167	1913	874	3953	2291	3142
YALI1_B17155g	4419	541	325	289	236	233	247	139	280	753	77	185	26	129	244	205	290	252	326
YALI1_B17214g	483	0	0	0	0	0	0	0	0	0	0	0	0	0	0	0	0	0	0
YALI1_B17228r	72	0	0	0	0	0	0	0	0	0	0	0	0	0	0	0	0	0	0
YALI1_B17229r	125	0	0	0	0	0	0	0	0	2	0	0	0	0	0	0	0	0	0
YALI1_B17261g	2160	405	189	174	156	118	115	110	201	300	28	20	2	10	24	32	71	34	51
YALI1_B17285g	306	187	202	137	127	125	86	182	154	308	114	160	22	170	298	173	474	266	486
YALI1_B17292g	315	756	718	306	317	285	289	287	376	944	696	811	65	693	1314	932	2206	1454	1906
YALI1_B17299t	501	0	0	0	1	0	0	0	0	0	0	0	0	0	0	0	0	0	0
YALI1_B17363g	2160	0	6	0	0	2	4	2	0	2	0	0	0	4	2	0	0	0	2
YALI1_B17406g	2112	142	100	54	33	30	37	32	42	102	16	19	4	6	0	8	22	6	28
YALI1_B17441g	2067	127	129	57	54	56	51	24	76	208	30	30	6	32	24	38	99	73	116
YALI1_B17468g	585	0	1	1	0	0	0	0	0	0	0	0	0	0	0	0	4	2	4
YALI1_B17493g	1749	25479	20906	12724	12042	11554	9350	10631	13443	32035	7813	10623	1252	10492	16934	12488	32369	19703	28475
YALI1_B17518g	1569	2382	2056	1458	1139	1212	1015	1327	1554	3520	661	827	85	877	1255	1163	2407	1790	2550
YALI1_B17569g	1920	1838	2061	1038	1166	996	580	605	961	2536	353	383	64	304	583	379	1086	889	963
YALI1_B17592g	2820	4921	5682	3307	2121	2388	1964	10398	3690	5024	972	1166	188	1382	2107	1336	3345	2931	3374
YALI1_B17624r	92	0	0	0	0	0	0	0	0	0	0	0	0	0	0	0	8	0	0
YALI1_B17660g	3174	2593	2670	1696	1881	1730	1498	1518	1605	5549	1236	1467	231	2049	2448	3437	5567	4240	6794
YALI1_B17695g	1686	13558	10614	6450	5851	5910	5239	12220	7836	16435	3102	3573	424	4264	7379	6060	11205	8096	11802
YALI1_B17724g	876	2858	2021	1190	867	1018	805	643	1101	3411	496	626	79	509	841	802	1775	1160	1778
YALI1_B17773g	1278	1556	1391	740	641	744	553	139	831	2321	632	786	121	1241	1267	1889	2405	1777	3335
YALI1_B17805g	1743	548	623	293	280	337	296	294	353	916	361	382	22	340	502	479	1084	697	1104
YALI1_B17838g	753	4959	5705	3567	2630	2911	2094	7351	3797	6189	1612	2032	315	2487	3665	2319	6572	4127	5568
YALI1_B17853g	477	17	24	22	8	6	20	11	14	13	6	6	0	6	7	14	8	1	20
YALI1_B17871g	966	8055	8157	4697	4051	4098	3080	5903	5146	10865	1385	2058	262	2164	3151	2189	6905	4076	5875
YALI1_B17908g	2880	5642	6845	3968	2713	3005	2321	16171	4283	5915	977	1363	129	1724	3071	1836	4042	3275	3862
YALI1_B17927g	2697	13051	10086	6601	5147	5180	4130	6260	6220	15185	3368	3937	420	4341	7738	6258	11629	7740	11955
YALI1_B17964g	849	1270	1960	959	545	649	503	2860	989	1367	369	542	68	557	901	508	1426	885	1338
YALI1_B17968g	453	282	685	336	139	136	114	360	251	338	212	243	24	233	350	310	848	550	786
YALI1_B17990g	1419	12171	10393	6431	6071	6070	5019	8998	8025	16398	3188	3876	485	4268	6990	5282	10955	8207	11489
YALI1_B17998g	327	68	75	26	33	22	20	51	37	103	13	33	2	24	44	41	74	76	113
YALI1_B18012g	1491	7087	8478	4739	3193	3430	2615	11403	4908	7512	1479	1928	257	2543	3653	2495	6285	4495	6013
YALI1_B18036r	92	0	2	0	0	0	0	0	0	0	0	0	0	0	0	0	0	0	0
YALI1_B18069g	2151	8849	10318	6176	4880	4774	4367	15869	5396	12392	5826	7945	827	9851	15460	12618	22824	16517	21965
YALI1_B18134g	1557	25494	25001	15742	13966	13500	10425	30781	18403	31496	14011	15730	2145	24321	34323	30747	49526	34310	50896
YALI1_B18190g	795	1401	1782	883	700	768	618	1589	879	1715	675	803	108	696	1053	801	2199	1331	2020
YALI1_B18205g	267	744	1302	606	329	413	330	847	614	1128	437	463	50	424	605	328	1279	716	1187
YALI1_B18207g	1569	2766	2995	1663	1305	1299	1059	2359	1622	3421	742	825	92	983	1621	1077	2841	1993	2858
YALI1_B18236g	1020	141	108	83	60	79	86	223	111	230	12	12	1	4	8	20	10	10	52
YALI1_B18260g	1230	1428	2189	1053	647	726	566	989	909	1833	642	777	106	792	1203	967	2258	1394	2412
YALI1_B18265g	360	901	1049	520	443	454	357	560	469	1208	333	414	27	349	825	462	1411	798	1241
YALI1_B18292g	1419	160	144	68	55	40	49	46	93	108	51	39	10	32	70	81	139	80	120
YALI1_B18311g	1560	6092	4395	2351	2695	2551	2270	823	2688	9809	1564	1781	207	1652	2812	2342	5491	3679	5606
YALI1_B18347g	1596	19462	13777	8045	8128	7867	6738	1181	8960	31707	9075	8772	950	11360	19130	16170	30995	20955	33582
YALI1_B18368g	342	1344	1136	540	386	442	296	751	626	1073	300	405	50	302	476	371	1122	610	1152
YALI1_B18375g	375	223	324	214	180	161	136	210	220	414	133	132	15	134	389	142	521	320	459
YALI1_B18384g	627	4743	6130	4018	2582	2298	1835	3999	3352	6141	2537	3339	506	4065	6027	3186	12021	6607	8968
YALI1_B18391g	630	1	2	2	0	0	0	0	4	6	4	0	0	0	2	0	4	4	3
YALI1_B18451g	5691	7941	5928	3978	3694	3389	3021	4847	4704	9626	2018	2509	311	2457	4299	3687	6695	4733	6989
YALI1_B18460g	723	1801	1775	1043	1044	963	749	813	1026	2449	686	696	93	799	1033	891	2310	1504	2100
YALI1_B18472g	360	10398	8088	4727	5137	4580	4379	3418	6146	14797	2229	2148	96	1647	3404	2635	5979	4220	6460
YALI1_B18499g	1839	87311	68090	40731	51677	49639	37319	106696	62298	110218	26592	31028	4460	46623	68496	58841	104882	71321	107020
YALI1_B18536g	1698	3294	3056	1728	1741	1754	1310	5942	2654	4050	818	890	126	1297	1907	1462	2711	2436	3281
YALI1_B18572g	1830	10862	8027	4450	6466	6280	5065	4603	6217	21028	9296	12531	1692	10713	16621	13414	41531	19858	36067
YALI1_B18607g	624	8959	7875	4386	3613	3433	2915	4941	4445	10201	2448	3042	348	3397	5025	3595	10058	5218	9292
YALI1_B18613g	267	1284	1602	747	658	633	575	1090	806	2260	554	741	71	687	1559	635	2365	1376	2115
YALI1_B18631g	1083	4114	3483	1937	1473	1332	1175	1247	2043	5494	535	583	87	546	1048	642	1637	1015	1804
YALI1_B18645g	2397	21702	13253	9445	9792	9656	7895	4943	10906	28206	4887	5839	870	7842	12546	11488	21042	13253	20481
YALI1_B18687g	1440	2086	2253	1121	832	843	760	2403	1674	2439	501	609	48	572	920	690	1759	1135	1737
YALI1_B18707g	945	104411	134762	69679	52845	55617	39185	182746	69043	124258	26179	34115	5319	46515	70430	39077	113790	72906	101845
YALI1_B18727g	1239	1804	3232	1541	825	1015	700	2468	1463	2135	680	858	143	1181	1754	1217	2719	1924	2560
YALI1_B18741g	1743	16448	14713	8347	8375	8502	7423	10807	6821	27964	5022	6446	784	8002	9957	10886	22974	13196	22865
YALI1_B18764g	1005	1272	1097	661	650	667	540	842	881	1799	248	372	40	373	605	604	1137	854	1158
YALI1_B18798g	2226	6246	6032	3887	3644	3228	2787	4974	3992	8720	2147	2834	333	3511	5041	4173	9102	5677	8579
YALI1_B18811g	750	10115	9360	5031	5343	5160	4210	7622	6278	14333	3787	4794	576	4546	7230	5289	14864	8334	12697
YALI1_B18845g	2610	9359	7086	4430	6074	6227	5158	13847	8271	12708	2164	2165	244	4190	7506	5760	7483	5748	7439
YALI1_B18854g	501	1251	1502	875	620	701	517	1842	870	1307	238	243	24	375	596	395	726	548	727
YALI1_B18887g	2820	1068	1106	589	601	531	338	831	787	1147	279	354	46	339	634	446	977	714	1055
YALI1_B18902g	1059	11268	8488	5468	5311	5330	4250	7775	6273	14534	3839	4226	467	4287	6805	6046	11747	7179	11191
YALI1_B18921g	231	16	19	13	19	22	21	13	21	46	9	35	4	23	33	24	120	50	93
YALI1_B18930g	831	75382	69056	41230	35957	33835	27257	48851	39343	97035	27665	31456	4334	35308	57914	38910	101311	58400	90326
YALI1_B18955g	900	14508	12478	6937	6457	6020	4988	8039	7233	18083	3457	4099	442	4338	7587	5463	13269	8608	12256
YALI1_B18971g	510	176	244	102	97	83	68	215	168	166	76	65	6	55	111	128	217	180	252
YALI1_B18975g	2436	8487	6929	4512	4179	4156	3559	6247	5415	10813	2664	3063	391	4079	6240	5164	9254	7139	10213
YALI1_B19021g	1878	7845	7505	4511	4048	3895	3245	11316	5052	9706	2164	2921	332	3638	6067	4354	9289	6291	8426
YALI1_B19044g	1272	76666	68741	38402	31018	32296	25567	38808	36244	80013	18420	20016	2493	23657	34724	26801	64706	39602	59778
YALI1_B19079g	1161	43928	66291	39474	43716	39986	27232	70199	42370	83684	20302	31628	4812	37722	53480	35010	103083	63307	92065
YALI1_B19107g	837	3034	2736	1746	1767	1672	1387	2021	2132	4696	1111	1249	149	1697	2497	1682	4228	2580	3906
YALI1_B19120g	2106	3715	2957	1748	1394	1408	1288	1514	1987	4653	934	1006	120	946	1511	1380	2820	1747	2782
YALI1_B19143r	150	109	91	78	104	84	75	137	56	224	47	90	4	126	309	84	508	361	353
YALI1_B19153g	657	516	716	337	230	279	288	824	389	729	55	102	4	49	123	59	219	152	203
YALI1_B19205g	4350	13437	10792	6874	5827	5653	5169	2742	7142	16981	2804	3672	368	3529	5723	4926	9720	7299	10282
YALI1_B19217g	2178	4985	3228	2298	2159	2106	1842	716	2451	7084	1234	1496	191	1262	1993	1496	3956	2183	4052
YALI1_B19276g	2913	13319	10480	6694	6672	6836	5633	5990	8026	19167	7582	10229	1313	11331	16637	13556	32867	20105	30512
YALI1_B19290g	558	7511	6787	3715	3419	3229	2716	3765	3906	9012	2731	3372	319	3470	5529	3917	11074	6435	9934
YALI1_B19323g	2322	17708	11123	7083	7046	8104	6782	682	7747	27275	5762	5704	890	9500	12560	15025	21506	14076	27639
YALI1_B19326g	327	560	447	268	291	303	254	66	289	777	272	308	46	310	364	263	912	507	832
YALI1_B19336g	579	2556	2106	1098	933	1078	911	764	1097	3050	949	1041	110	877	1424	1058	2961	1889	3239
YALI1_B19348g	765	3983	3042	1709	1319	1586	1303	477	1512	6000	984	1105	147	911	1628	1269	3365	2051	3315
YALI1_B19388g	3072	6851	8907	4593	3203	3697	2660	29030	5886	6302	882	1159	176	1505	2636	1536	3271	2877	3271
YALI1_B19390g	1584	2035	1941	1031	708	724	657	1644	939	2488	794	888	58	811	1691	930	2892	1829	2568
YALI1_B19429g	498	108715	116563	58878	51016	52609	42359	71884	54282	132906	17957	17561	2550	26045	36398	31523	63120	50071	64176
YALI1_B19453g	237	1287	1362	943	569	600	535	503	691	1874	665	577	71	584	878	633	1708	1079	1785
YALI1_B19485g	2745	7123	5767	3885	2947	3031	2785	2848	3919	8763	1586	2137	255	2582	3751	3596	6942	4917	7370
YALI1_B19490g	1395	2213	1737	1247	996	824	797	1005	1285	2802	469	653	67	503	923	651	1519	1152	1348
YALI1_B19507g	486	13971	15083	7513	7086	7101	5281	13701	8059	18175	4072	5325	615	5219	9123	5855	17777	10054	15352
YALI1_B19520g	3513	4000	4455	2526	1724	1701	1275	2229	2521	4583	1061	1327	219	1968	2704	2145	4470	2898	4722
YALI1_B19567g	969	5767	5640	2989	1998	2198	1616	7778	2869	5149	1367	1450	256	1634	2320	1748	4168	2733	4172
YALI1_B19576g	936	5553	5632	2944	2151	2104	1720	12099	3097	5839	1076	1368	150	1388	2502	1467	3888	2674	3356
YALI1_B19587r	105	0	0	0	2	0	2	0	1	1	0	1	0	0	0	0	0	0	0
YALI1_B19602g	4926	9203	7363	4965	4152	4187	3445	8857	5019	10807	2332	2662	323	2998	4845	4143	7686	5531	8494
YALI1_B19668g	3993	17481	11080	8303	8116	7718	6847	6823	9980	21009	3878	4831	571	6241	10522	8934	17892	11911	17154
YALI1_B19713g	882	6369	6633	3950	2959	3135	2415	10366	4326	6885	1511	2218	240	2554	4116	2183	6966	4617	5885
YALI1_B19747g	2091	6472	5136	3323	2799	2849	2410	4701	3779	7351	1407	1658	192	2208	3162	2674	5234	3664	5498
YALI1_B19774g	1368	4863	4987	2626	2263	2174	1814	4847	3043	6268	1227	1408	176	1700	2903	2053	4729	3491	4470
YALI1_B19844g	6261	84572	107751	67878	42071	38713	31570	108553	56846	87412	27487	35753	4814	36072	57283	43092	87369	55831	85687
YALI1_B19856g	291	10	18	7	4	5	2	41	11	6	4	7	0	2	0	6	21	6	22
YALI1_B19877g	279	61	55	53	39	19	30	101	38	58	17	22	4	14	44	16	58	37	59
YALI1_B19880g	810	17285	18851	10397	8162	7648	6213	21945	8879	20775	6770	7081	851	7271	12904	7106	23899	13470	19652
YALI1_B19897g	519	67805	93813	50150	36412	38777	26023	174739	50426	66503	16209	24062	3692	30461	45919	18842	84717	56414	70507
YALI1_B19932g	591	17235	14250	8021	7922	8194	5935	28408	9637	17013	4542	5573	732	5277	6836	5866	15744	8124	14908
YALI1_B19962g	2118	8153	7161	4718	3919	3939	3077	5815	4883	10549	2425	2786	376	3165	4623	3588	8248	5342	7839
YALI1_B20009g	1593	5063	6383	3472	3387	3444	2579	3957	3211	10538	2046	2283	294	3194	3914	5275	8400	6294	10215
YALI1_B20043g	840	3844	2664	1772	1488	1505	1203	881	1933	4541	1240	1328	155	1369	2168	1734	4106	2303	3779
YALI1_B20052g	861	7381	6511	4417	3709	3413	2899	5380	4392	9789	2525	3029	287	2935	4780	3403	9198	5491	7959
YALI1_B20094g	2766	2877	2849	1797	1515	1585	1315	2643	2180	3894	762	897	148	1437	1852	1768	2927	2433	3332
YALI1_B20108g	909	6440	5334	3157	2054	2175	1888	4122	3241	7082	1625	1936	208	1454	2552	1821	4986	3360	4960
YALI1_B20130g	1080	3375	3113	1735	1791	1717	1488	840	1771	5884	1394	1650	186	1764	2638	2536	5680	3310	5630
YALI1_B20145g	447	62	77	55	32	41	13	96	51	89	7	14	2	21	22	23	70	40	25
YALI1_B20153g	1641	16827	23299	11134	8501	9075	6968	40872	12408	18022	3447	4329	723	5560	8799	5048	13770	10700	13467
YALI1_B20188g	1614	3208	3542	1903	959	1143	904	8593	1616	2380	530	538	95	614	722	497	1348	1088	1580
YALI1_B20192g	891	2945	2757	1458	961	1032	851	1157	1326	3367	942	940	97	761	1449	1206	2326	1629	2692
YALI1_B20205g	1362	1956	2201	1182	861	952	735	1252	1072	2583	708	799	151	882	1182	1015	2464	1471	2351
YALI1_B20242g	2220	3170	2807	1481	1408	1544	1294	2375	1742	4565	669	951	117	920	1511	1426	2823	1965	2727
YALI1_B20243g	1893	2621	3275	1578	865	1017	771	6728	1577	2350	402	441	76	486	589	662	1190	948	1571
YALI1_B20276g	1173	2822	2815	1546	1578	1516	1186	2161	1540	3831	1097	1338	178	1638	2446	2025	4792	2804	4549
YALI1_B20289g	1110	15186	16214	8744	8982	8985	6387	16152	9600	22185	3119	3947	574	6007	7632	6019	14348	8485	13125
YALI1_B20319g	1437	166	89	94	85	89	90	69	116	263	38	42	2	22	20	28	92	51	51
YALI1_B20337g	1383	2695	2345	1044	634	836	679	176	829	2963	323	395	40	334	451	438	1057	552	993
YALI1_B20359g	660	9	9	0	3	0	12	2	2	2	0	2	0	0	6	2	6	4	8
YALI1_B20378g	1548	32191	35391	19127	16519	15489	13079	27463	16466	46989	23352	30650	4028	35742	55841	44561	92930	59798	85877
YALI1_B20399g	252	40	41	24	11	29	10	5	30	43	9	26	2	17	31	27	41	35	55
YALI1_B20407g	237	22	44	18	22	15	19	28	18	54	18	13	4	20	25	23	35	27	42
YALI1_B20416g	2838	2534	4312	2420	1216	1272	1097	2750	1608	3188	1169	1541	185	1734	2946	2026	4441	2788	4290
YALI1_B20462g	1470	179496	132686	78712	75898	71076	55646	118220	88774	200391	46508	58540	7191	63577	102368	78005	200078	116729	172656
YALI1_B20493g	585	1724	1479	889	711	649	603	1047	816	1738	620	609	71	663	1242	935	1952	1076	1856
YALI1_B20521g	2196	3858	4670	2796	2125	2153	1630	18900	3318	3723	671	773	123	954	1661	1027	2413	2042	2287
YALI1_B20527g	1776	8303	6901	4333	3974	4014	3338	8005	4937	10924	1792	2209	258	2392	4191	2903	6869	4505	6221
YALI1_B20577g	2985	8056	7005	4340	3362	3585	2880	5262	4347	9692	2385	2835	357	3041	4628	4047	7847	5129	8430
YALI1_B20589g	2046	10361	12139	6561	4838	5189	4068	27242	7391	11789	2263	2812	345	3469	5761	3695	8710	6391	8265
YALI1_B20634g	6552	4210	3779	2321	1848	1729	1468	2448	2130	5133	1531	1834	224	1962	2861	2616	5023	3384	5654
YALI1_B20709g	276	14	1	14	9	7	6	6	6	23	14	13	9	9	21	14	46	27	36
YALI1_B20717g	576	7628	7576	4565	3590	3292	2854	5524	4169	9116	2787	3349	471	3848	5437	3953	9976	6097	9396
YALI1_B20730g	1677	15545	13097	8477	6910	6523	5479	18435	8914	16752	2777	3392	433	3615	5979	4161	10028	7266	9108
YALI1_B20765g	543	38	28	16	21	32	2	31	20	53	8	14	8	18	17	6	65	20	36
YALI1_B20777g	2049	4330	4412	2781	2404	2364	2029	1691	2794	6042	1608	2006	241	2376	3745	2782	6778	4285	6087
YALI1_B20802g	978	17907	12879	8576	7749	7048	6040	15205	9134	18810	3711	4347	476	4418	8622	4892	13789	9494	11758
YALI1_B20834g	2031	4332	3922	2302	1537	1912	1418	2836	2379	5068	937	1106	138	1250	1661	1603	3530	2324	3401
YALI1_B20835g	1104	3322	3436	1970	1622	1546	1282	4078	2074	3911	910	1030	138	1033	1917	1098	3075	2169	2918
YALI1_B20870g	2181	4868	3722	2387	1972	2097	1903	1742	2618	5825	2106	2827	424	3246	4126	4400	8068	5740	8390
YALI1_B20887g	498	685	743	413	341	350	280	605	439	1034	695	830	75	769	1018	825	2419	1440	2128
YALI1_B20899r	74	0	0	0	0	0	0	1	0	1	0	0	0	0	4	0	0	0	0
YALI1_B20919g	1530	5039	4271	2166	1922	2132	1705	1502	2528	6480	1166	1454	159	1493	2606	2075	4396	2693	4098
YALI1_B20935g	2502	3529	2696	1637	1218	1274	1191	1476	1696	3918	1232	1508	205	1306	2244	1911	3594	2684	4019
YALI1_B20968g	732	12	8	12	12	10	14	20	23	30	0	0	0	0	2	0	10	0	2
YALI1_B20992g	1392	5654	5252	3152	2663	2703	2223	8299	3715	6221	1345	1642	177	1944	2683	1826	4848	3120	4430
YALI1_B21004g	1350	2143	1526	1129	926	932	723	862	1163	2772	457	627	44	520	982	666	1749	1095	1672
YALI1_B21030g	966	2119	3181	1834	1378	1363	1131	3459	2005	3094	375	561	112	719	1156	516	1928	1458	1689
YALI1_B21042g	372	1192	1280	507	463	480	376	460	673	1394	427	543	67	612	752	543	1644	948	1679
YALI1_B21043g	243	1763	1501	803	914	990	814	73	801	3182	522	631	88	554	897	786	2091	1170	2191
YALI1_B21070g	1584	23194	29735	15496	11241	11580	8378	64312	15860	24120	4342	5631	714	6556	11631	6272	17837	12653	17047
YALI1_B21088g	993	8334	7994	4844	3694	3753	2775	12085	4397	10354	2035	2143	291	2350	3740	2719	5885	3770	5691
YALI1_B21104g	366	151	142	82	100	136	61	174	163	326	108	126	10	91	190	100	284	216	303
YALI1_B21114g	1164	487	219	145	185	142	181	107	256	653	7	9	0	12	24	6	26	18	38
YALI1_B21134g	837	1447	711	1100	600	598	727	845	1423	1443	229	216	33	157	294	418	497	445	617
YALI1_B21155g	1095	262	268	111	238	303	277	269	248	919	644	661	37	424	645	718	1576	1454	1560
YALI1_B21194g	2244	11959	11126	5886	4279	4391	3195	9783	5558	12754	2583	3123	332	3610	4866	4043	9201	6535	10122
YALI1_B21208g	3510	9723	10135	5408	4057	4342	3397	21054	5642	9707	1538	2056	240	2283	3933	2683	5982	4372	5847
YALI1_B21250g	645	8136	7442	3616	2839	3059	2419	4504	3005	9915	3734	4290	677	5135	6634	6081	16390	7919	14790
YALI1_B21275g	1902	5037	4388	2562	2109	2107	1509	2900	2633	6018	1256	1489	219	1343	2424	1725	4163	2645	4150
YALI1_B21313g	2961	18178	14624	8323	7617	8533	7479	10432	7098	27637	5342	6728	800	7728	9866	11301	22358	14035	23504
YALI1_B21320r	72	0	0	0	0	0	0	2	0	0	0	0	0	0	0	0	0	0	0
YALI1_B21323g	1287	6493	6282	3727	3111	3038	2697	5372	3836	9156	2069	2492	282	2739	4224	3200	7629	4876	7241
YALI1_B21356g	1827	5535	4633	2871	2432	2501	2070	2087	2883	7673	1348	1648	183	1429	2626	2060	4485	2941	4525
YALI1_B21381g	1737	1517	1684	1249	826	790	724	476	1155	2178	265	372	18	323	453	506	998	802	1149
YALI1_B21423g	2241	9655	9543	6286	5072	4755	4081	8068	6586	13412	2941	3893	432	4526	6711	4627	11793	7684	10606
YALI1_B21432g	972	3525	2966	1924	1291	1374	1154	1552	1815	3968	1222	1209	190	1261	1889	1619	3808	2203	3729
YALI1_B21466g	1482	3172	3388	2036	1629	1794	1536	2783	2303	4309	1255	1608	191	1593	2208	2229	4020	2657	4571
YALI1_B21493g	1551	66715	41312	32883	37410	32173	29958	7592	35692	102841	20560	23263	2590	25484	43513	41777	77293	50607	76699
YALI1_B21538g	1734	49122	36413	30793	34755	32063	26381	10005	33119	82004	7795	12815	1761	15518	22265	14246	35375	23516	29915
YALI1_B21562g	2766	3628	9167	4402	1907	2163	1681	6617	2942	4320	1597	1931	287	3050	4610	2886	6309	4394	6122
YALI1_B21594g	729	797	1837	867	408	417	388	709	583	1354	491	636	85	752	1292	614	1982	1180	1644
YALI1_B21618g	1347	1169	1553	935	780	847	700	1329	980	1755	306	557	78	596	925	658	1499	1045	1527
YALI1_B21628g	960	8449	8128	4220	3813	3635	2968	4262	3935	11009	2742	3185	324	2958	4586	3571	8689	5350	8590
YALI1_B21675g	3282	18809	12205	8717	11022	10210	9742	1628	11118	30043	6542	8184	1284	12724	18226	19105	27960	18730	31079
YALI1_B21714g	1233	4684	5826	3122	1950	2023	1483	8586	2854	4435	774	909	103	1042	1640	890	2224	1985	2301
YALI1_B21737g	2442	4389	4216	2519	3030	2505	2212	3166	2087	9167	1522	1725	219	2000	2566	2844	5918	4040	6659
YALI1_B21774g	999	4080	3364	1842	1766	1850	1313	1516	1964	5412	1271	1317	151	1282	2040	1641	4045	2327	4059
YALI1_B21787g	975	6648	5201	3241	2787	2667	2263	5713	3714	7138	1460	1605	171	1560	2744	1931	4398	2926	4370
YALI1_B21798g	783	4674	6012	3111	2552	2810	1831	9549	3523	4968	1079	1585	251	2227	3104	1523	5595	3749	4590
YALI1_B21816g	708	366	595	297	197	174	127	227	190	499	252	261	37	226	441	248	835	368	717
YALI1_B21819g	684	588	666	364	303	276	262	499	410	795	162	246	14	211	308	280	751	471	753
YALI1_B21855g	2202	12586	12693	7735	5896	5785	4850	9174	6774	16793	3509	4377	499	4747	7517	5685	12778	8394	12867
YALI1_B21885g	3414	12035	10315	7120	3921	4084	3590	5102	5808	12500	2825	3426	442	3575	4874	3914	9702	5927	9685
YALI1_B21935g	939	516	515	225	181	117	139	252	105	648	52	111	16	45	80	38	203	101	153
YALI1_B21946g	285	403	545	326	169	187	154	168	247	516	320	325	59	333	488	335	947	525	835
YALI1_B21966g	2100	7613	7078	4339	3778	3578	2932	6231	4992	9115	2553	3323	467	3899	6427	4562	10488	6489	9798
YALI1_B22015g	2352	9288	13305	6911	3608	4189	3119	30367	6290	7939	1651	1954	288	2620	3975	2138	6189	4977	5835
YALI1_B22020g	2859	5436	6413	3418	2498	2534	2239	6050	3413	7242	2241	2632	281	3157	5360	3419	8031	5557	7958
YALI1_B22055g	315	576	669	387	230	261	230	291	398	904	228	215	29	205	358	229	659	361	757
YALI1_B22060g	546	2051	2407	1263	1031	889	691	1755	1303	2701	697	828	110	826	1392	774	2753	1613	2388
YALI1_B22088g	777	8828	8427	4262	4308	4226	3415	3019	4053	12350	2324	2902	302	3416	4750	3651	10138	6044	9287
YALI1_B22109g	2616	3336	5882	2889	1741	1787	1519	4445	2168	4010	1150	1673	243	2102	3163	2419	4849	3300	4956
YALI1_B22158g	8946	398	257	126	181	141	170	207	232	390	170	213	6	172	288	251	460	237	430
YALI1_B22259g	996	2761	2607	1700	1328	1196	1178	3119	1907	3693	267	353	54	348	708	494	1071	733	1223
YALI1_B22266g	471	5528	4726	2733	1777	1854	1541	2533	2425	6447	2021	1897	236	1564	2923	1852	5848	3257	5001
YALI1_B22276g	2280	9630	6940	4653	3828	3795	3295	4040	4771	11637	2462	2930	298	2517	4066	3465	7425	4765	7368
YALI1_B22302r	89	0	0	0	0	0	0	0	1	0	0	0	0	0	0	0	0	3	0
YALI1_B22321g	1749	330	187	101	145	159	141	20	189	520	135	115	10	139	256	144	393	240	359
YALI1_B22351g	825	754	649	390	265	293	258	250	204	1063	118	160	16	128	293	191	404	224	428
YALI1_B22372g	1308	767	861	476	383	373	349	214	387	1386	344	436	31	442	670	704	1267	748	1186
YALI1_B22375g	657	475	451	195	200	181	111	120	191	698	94	115	12	86	151	85	375	192	320
YALI1_B22391g	297	204	229	138	67	88	97	76	147	288	94	95	4	113	181	91	283	139	187
YALI1_B22410g	1569	2127	1815	1220	1235	1201	996	1162	1352	3214	798	1154	110	1418	1814	1658	3225	1849	3198
YALI1_B22414g	2058	1857	1614	938	889	906	730	955	1132	2566	416	446	67	599	772	895	1396	1096	1859
YALI1_B22452g	1716	4	8	0	3	6	4	2	6	10	10	4	0	8	12	19	23	30	11
YALI1_B22499g	2058	2022	2517	1316	1108	1130	967	2723	1596	2755	534	651	85	835	1254	975	1935	1527	1867
YALI1_B22512g	300	276	446	222	159	148	136	251	220	480	160	250	20	216	338	282	620	365	607
YALI1_B22533g	969	4162	4303	2733	1993	1976	1720	6881	2691	4855	977	1128	138	1198	1969	1218	3047	2045	2956
YALI1_B22549g	873	1802	1910	1124	1006	1201	919	1876	1361	2675	590	798	101	1039	1455	1118	2708	1694	2397
YALI1_B22561g	432	5077	4739	2880	2335	2064	1966	3787	3054	6649	1445	1705	205	1448	2619	1787	4966	2918	4695
YALI1_B22598g	1131	11590	8931	5871	6086	5866	4654	8125	6776	15126	3218	4097	563	4555	7025	5043	14351	7953	12486
YALI1_B22614g	1449	14716	15716	9208	7793	8233	6227	22858	9882	17622	3211	4277	484	5284	9047	5806	14026	9170	12036
YALI1_B22638g	708	3559	3392	1844	1526	1408	1142	2191	1764	4224	1437	1399	174	1441	2447	1640	4531	2650	4100
YALI1_B22645g	492	1370	1065	791	517	758	599	1045	735	1820	381	502	46	316	596	404	1418	621	1133
YALI1_B22667g	1515	3051	2709	1623	1418	1359	1128	1804	1702	4177	1097	1118	119	1109	2064	1658	3635	2247	3396
YALI1_B22677g	417	5385	5507	3145	3301	3051	2496	6254	4262	7590	1962	2411	249	2871	3780	3066	7546	4366	7198
YALI1_B22697g	1191	7185	7693	4916	4041	3885	3126	7225	5170	9531	2301	3030	440	3665	5496	3598	9446	5918	8101
YALI1_B22721g	900	1960	1244	1072	871	786	757	261	864	2729	505	604	72	582	1121	863	2088	1126	1768
YALI1_B22747g	1962	2174	2429	1370	988	1042	932	3930	1408	2933	468	628	86	700	858	861	1702	1408	2085
YALI1_B22769r	119	0	0	0	2	0	1	2	2	0	0	4	0	0	0	2	0	2	0
YALI1_B22770r	88	0	0	1	0	0	0	0	0	2	0	0	0	0	0	1	0	0	0
YALI1_B22793g	1872	29138	25474	14133	13987	12932	10432	20835	14312	41137	8512	9717	1121	10419	17118	13943	32041	20686	32454
YALI1_B22820g	1032	7111	6607	3395	2721	2745	2163	3425	3215	8858	2183	2412	265	2629	4215	3010	8028	4501	7104
YALI1_B22853g	2568	31358	28158	15975	14686	14824	11764	19312	16911	36952	7858	9761	1271	11684	18724	13696	31456	20764	29913
YALI1_B22883g	1119	5641	5128	3379	2749	2707	2355	4714	3307	7724	2628	3158	353	3217	5574	3153	8988	6826	9060
YALI1_B22905g	291	11508	12151	5788	4294	4336	3519	10745	6157	12988	2763	3265	292	2747	4700	2784	8462	5147	8350
[truncated: 6,606 more rows]
